# Supplementary material for: Bromide-selective Suzuki cross-coupling of bromophenyl triflates enabled by bidentate diimine-Pd complexes
Source: Royal Society of Chemistry journal article supplement (doi:10.1039/d5ob01266j), 2025-01-01
Supplement: d5ob01266j1.pdf [file d5ob01266j1.pdf]

## Supporting Information

### **Bromide-Selective Suzuki Cross-coupling of Bromoaryl Triflates Enabled by Bidentate Diimine-Pd Complexes**

Li-Yao Wang, Xiao-Dan Su, Feng-Shou Liu\* and Chang Xu\*

*School of Chemistry and Chemical Engineering, Guangdong Pharmaceutical University,  
Zhongshan, Guangdong, 528458, China*

\*Corresponding authors: Chang Xu, E-mail: [xcpanda9@163.com](mailto:xcpanda9@163.com).

Feng-Shou Liu, E-mail: [fengshou2004@126.com](mailto:fengshou2004@126.com).

### **Contents**

|                                                              |         |
|--------------------------------------------------------------|---------|
| 1. General experimental information.....                     | S1      |
| 2. Synthesis procedure for the catalysts.....                | S1-S4   |
| 3. General procedure for Pd catalyzed Suzuki reactions.....  | S5-S6   |
| 4. Characterization data of the Suzuki coupled products..... | S6-S10  |
| 5. NMR spectrums of the catalysts and reaction products..... | S10-S58 |
| 6. References.....                                           | S58     |

## 1. General experimental information

All bromoaryl triflate and aryl boronic acids were purchased from Aldrich Chemical. Aryl amines, glyoxal, acenaphthenequinone, and palladium (II) chloride were also commercially obtained from Aldrich Chemical. Inorganic bases were purchased from Darui Chemical Reagent Factory. Isopropyl alcohol and other solvents were obtained from Guangzhou Chemical Reagent Factory and used directly. Complexes **C1-C2** were prepared following the procedures described below. **C3-C10** were synthesized according to the previous literature.<sup>1-2</sup>

The NMR data of the compounds were acquired on a Varian Mercury-Plus 400 MHz spectrometer at room temperature, unless stated otherwise. The decoupled nucleus was used, with CDCl<sub>3</sub> as the solvent and TMS as the reference standard. *J* values are given in Hz. GC yields for optimization studies were obtained using a Shimadzu GC-2010 Plus instrument.

All Suzuki coupling reactions were carried out using a parallel reaction apparatus (WP-RH-1020, WATTECS) under air conditions. The subsequent work-up and purification procedures were performed using reagent-grade solvents obtained from Guangzhou Chemical Reagent Factory. Purification was achieved through standard column chromatography techniques employing silica gel.

## 2. Synthesis procedure for the catalysts

The synthetic routes for complexes **C1** and **C2**, depicted in Scheme 1, were modified based on previous methods.<sup>1-2</sup> These complexes were obtained in good to high yields and isolated as air-stable yellow solids. Their chemical structures were confirmed using <sup>1</sup>H and <sup>13</sup>C NMR spectroscopy.

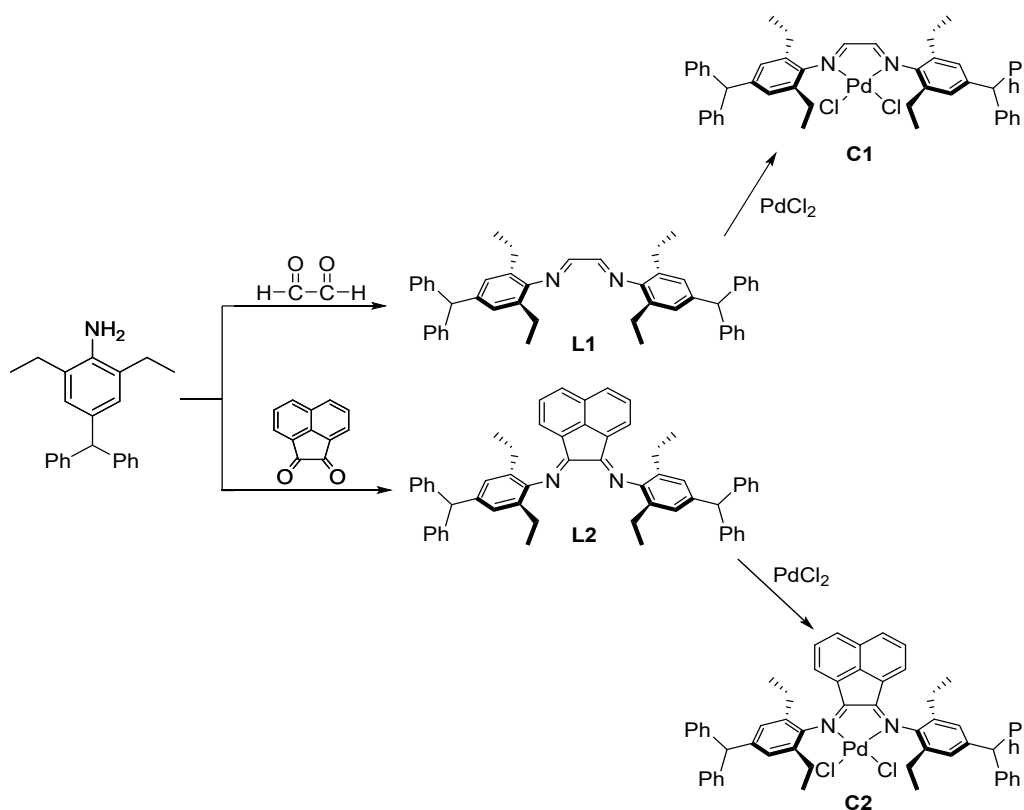

Scheme 1. The synthetic procedure of the investigated Pd-diimine complexes **C1-C2**.

**Procedure for the Synthesis of  $\alpha$ -Diimine Compounds L1-L2.** Under  $\text{N}_2$  atmosphere, 4-(diphenylmethyl)-2,6-diethylaniline (20 mmol, 6.30 g), 40% glyoxal solution (10 mmol, 1.44 g), anhydrous ethanol (30 mL) and acetic acid (3 mL) were transferred into a flask and the resulting mixture was allowed to stir at room temperature under air for 24 hours. Upon reaction completion, collect the yellow precipitate by suction filtration. Dry the solid, then recrystallize from dichloromethane/anhydrous ethanol to obtain the titled compound **L1** as a yellow solid in 85% yield (8.5 mmol, 5.5 g).

**L1:**  $^1\text{H}$  NMR (400 MHz,  $\text{CDCl}_3$ )  $\delta$  8.05 (s, 2H), 7.25 – 7.18 (m, 10H), 7.07 (d,  $J = 7.5$  Hz, 10H), 6.77 (s, 4H), 5.43 (s, 2H), 2.37 (q,  $J = 7.5$  Hz, 8H), 1.00 (t,  $J = 7.5$  Hz, 12H).  $^{13}\text{C}$  NMR (101 MHz,  $\text{CDCl}_3$ )  $\delta$  163.26, 147.51, 144.23, 140.32, 132.38, 129.48, 128.29, 127.68, 126.24, 56.58, 22.71, 14.47.

4-(diphenylmethyl)-2,6-diethylaniline (22 mmol, 6.90 g), acenaphthenequinone (10 mmol, 1.82 g), anhydrous zinc chloride (23 mmol, 3.20 g) and acetic acid (25 mL) were combined in a flask under  $\text{N}_2$  atmosphere and the mixture was allowed to heat at 140  $^\circ\text{C}$  for 5 h. After completion of the reaction, cool the mixture to room temperature, and

collect the reddish-orange solid via filtration using a Büchner funnel. The obtained solid was washed by acetic acid, dried by oven and redissolved in CH<sub>2</sub>Cl<sub>2</sub>. Potassium oxalate (4.60 g, 25 mmol) in 150 mL H<sub>2</sub>O was added into the CH<sub>2</sub>Cl<sub>2</sub> solution, and the resulting mixture was allowed to stir at RT for 24 h. Upon completion of the stirring, the reaction mixture was filtered to remove white solid and the filtrate was stewed and layered. The organic layer was then dried over anhydrous sodium sulfate, filtered, concentrated under vacuum and recrystallized from CH<sub>2</sub>Cl<sub>2</sub>/ethanol. The titled compound **L2** was obtained as orange/reddish solids 6.99 g (9.0 mmol, 90% yield). The NMR data for **L2** are consistent with those previously reported in the literature.<sup>3</sup>

**Procedures for the Synthesis of Pd-Diimine Compounds C1-C2.** Under nitrogen atmosphere, a mixture of **L1** (0.5 mmol, 0.326 g), PdCl<sub>2</sub> (0.55 mmol, 0.0975 g), and 10 mL of methanol was heated slowly to 60°C and stirred at 60°C for 24 h. After completion, the solution was cooled to room temperature. Purify the crude product by dry-column flash chromatography using dichloromethane as the eluent. Concentrate the collected fractions under reduced pressure, then recrystallize from dichloromethane/n-hexane to afford the desired complex **C1**.

**C1** was obtained as bright-yellow solids in 70% yield (0.29 g). <sup>1</sup>H NMR (400 MHz, CDCl<sub>3</sub>) δ 8.31 (s, 2H), 7.24 (dd, *J* = 9.5, 5.3 Hz, 8H), 7.17 (d, *J* = 7.3 Hz, 4H), 7.06 (d, *J* = 7.3 Hz, 8H), 6.71 (s, 4H), 5.44 (s, 2H), 2.50–2.48 (m, 8H), 0.96 (t, *J* = 7.5 Hz, 12H). <sup>13</sup>C NMR (101 MHz, CDCl<sub>3</sub>) δ 170.03, 142.91, 142.59, 141.82, 134.35, 128.42, 127.32, 125.86, 125.37, 55.55, 23.83, 12.93.

**C2** was synthesized according to the same procedure and obtained as yellow-orange solids in 80% yield (0.38 g). <sup>1</sup>H NMR (400 MHz, CDCl<sub>3</sub>) δ 8.15 (d, *J* = 8.3 Hz, 2H), 7.48 (t, *J* = 7.8 Hz, 2H), 7.35 (t, *J* = 7.5 Hz, 8H), 7.28–7.24 (m, 4H), 7.20 (d, *J* = 7.2 Hz, 8H), 7.03 (s, 4H), 6.55 (d, *J* = 7.2 Hz, 2H), 5.63 (s, 2H), 2.94–2.85 (m, 4H), 2.75–2.63 (m, 4H), 1.17 (t, *J* = 7.5 Hz, 12H). <sup>13</sup>C NMR (100 MHz, CDCl<sub>3</sub>) δ 175.69, 144.49, 143.62, 140.88, 135.02, 132.65, 129.54, 129.32, 127.86, 126.56, 125.43, 124.86, 56.78, 24.94, 13.91.

### 3. General procedure for Pd-diimine catalyzed Suzuki reactions

**General procedure for Pd-diimine catalyzed Suzuki reactions of bromoaryl triflates.** Under an air atmosphere, bromoaryl triflate (0.25 mmol), arylboronic acid (0.26 mmol), base (0.5 mmol), palladium  $\alpha$ -diimine complex (0.25 mol%), and solvent (1 mL) were sequentially added into a parallel reaction tube. The resulting mixture was allowed to stir at 80 °C for 4 h. After completion, the reaction mixture was cooled to room temperature and followed by extraction with ethyl acetate three times ( $3 \times 10$  mL). The organic layers were combined and dried with anhydrous sodium sulfate, filtered, and subsequently analyzed by gas chromatography (GC) to determine the GC yield. The solvent was removed by rotary evaporation under reduced pressure. The residue was purified by thin-layer chromatography (TLC) or silica-gel column chromatography to afford the products. The isolated yields of coupled products were calculated based on the feedings of the bromophenyl triflates.

**General procedure for Pd-NHC catalyzed Suzuki reactions of aryl triflates.** Under an air atmosphere, aryl triflate (0.25 mmol), arylboronic acid (0.26 mmol), potassium carbonate (0.5 mmol), Pd-NHC complex (0.000625 mmol, 0.25 mol%), and MeOH (1 mL) were sequentially added into a parallel reaction tube. The resulting mixture was allowed to stir at 80°C for 4 h. After completion, the reaction mixture was cooled to room temperature and followed by extraction with ethyl acetate three times ( $3 \times 10$  mL). The organic layers were combined and dried with anhydrous sodium sulfate, filtered, and concentrated. The resulting residue was then purified by thin-layer chromatography on silica-gel using petroleum ether/ethyl acetate to afford the corresponding products. The isolated yields of coupled products were calculated based on the feedings of the aryl triflates.

**Reaction procedure for Pd-diimine catalyzed Competitive Suzuki reactions.** Under an air atmosphere, bromobenzene (0.50 mmol, 0.079 g), phenyl

triflate (0.50 mmol, 0.11 g), *p*-tolylboronic acid (0.52 mmol, 0.07 g), potassium carbonate (0.5 mmol, 0.14 g), complex **C3** (0.25 mol%, 0.0014 g), and <sup>i</sup>PrOH/H<sub>2</sub>O (19:1, 1 mL) were sequentially added into a parallel reaction tube. The mixture was stirred at 80 °C for 4 h. After cooling to ambient temperature, 1,3,5-trimethoxybenzene (84 mg, 0.50 mmol) was added as an internal standard to the mixture and stirred for 30 min. The mixture was then concentrated under reduced pressure. <sup>1</sup>H and <sup>19</sup>F NMR spectroscopy was performed on the residue.

#### 4. Characterization data of the Coupled products

4'-methyl-[1,1'-biphenyl]-4-yl trifluoromethanesulfonate (**3a**) <sup>1</sup>H NMR (400 MHz, CDCl<sub>3</sub>) δ 7.62 (d, *J* = 8.8 Hz, 2H), 7.45 (d, *J* = 8.1 Hz, 2H), 7.32 (d, *J* = 8.8 Hz, 2H), 7.28 (s, 2H), 2.40 (s, 3H). <sup>13</sup>C NMR (100 MHz, CDCl<sub>3</sub>) δ 148.74, 141.65, 138.02, 136.41, 129.73, 128.66, 127.03, 121.59, 118.80 (q, *J* = 319.0 Hz), 21.15. <sup>19</sup>F NMR (376 MHz, CDCl<sub>3</sub>) δ -72.77.

3'-methyl-[1,1'-biphenyl]-4-yl trifluoromethanesulfonate (**3b**) <sup>1</sup>H NMR (400 MHz, CDCl<sub>3</sub>) δ 7.57 (d, *J* = 6.0 Hz, 2H), 7.31 (m, 5H), 7.19 (m, 1H), 2.40 (s, 3H). <sup>13</sup>C NMR (100 MHz, CDCl<sub>3</sub>) δ 149.54, 142.47, 139.91, 139.31, 129.50, 128.61, 124.94, 124.26, 122.20, 119.47 (q, *J* = 319.0 Hz), 22.1. <sup>19</sup>F NMR (376 MHz, CDCl<sub>3</sub>) δ -72.77.

2'-methyl-[1,1'-biphenyl]-4-yl trifluoromethanesulfonate (**3c**) <sup>1</sup>H NMR (400 MHz, CDCl<sub>3</sub>) δ 7.42 (d, *J* = 8.7 Hz, 2H), 7.35–7.33 (m, 2H), 7.30 (d, *J* = 3.6 Hz, 2H), 7.28 (s, 1H), 7.22 (d, *J* = 7.2 Hz, 1H), 2.28 (s, 3H). <sup>13</sup>C NMR (100 MHz, CDCl<sub>3</sub>) δ 148.52, 142.39, 139.93, 135.25, 131.01, 130.55, 129.67, 127.99, 126.01, 121.03, 118.80 (q, *J* = 319.0 Hz), 20.40. <sup>19</sup>F NMR (376 MHz, CDCl<sub>3</sub>) δ -72.82.

4'-ethyl-[1,1'-biphenyl]-4-yl trifluoromethanesulfonate (**3d**) <sup>1</sup>H NMR (400 MHz, CDCl<sub>3</sub>) δ 7.67–7.62 (m, 2H), 7.49 (d, *J* = 8.1 Hz, 2H), 7.35–7.33 (m, 4H), 2.72 (q, *J* = 7.6 Hz, 2H), 1.30 (t, *J* = 7.6 Hz, 3H). <sup>13</sup>C NMR (100 MHz, CDCl<sub>3</sub>) δ 148.76, 144.37, 141.69, 136.67, 128.69, 128.56, 127.14, 121.60, 118.83 (q, *J* = 319.0 Hz), 28.55, 15.56. <sup>19</sup>F NMR (376 MHz, CDCl<sub>3</sub>) δ -72.78.

2'-ethyl-[1,1'-biphenyl]-4-yl trifluoromethanesulfonate (**3e**) <sup>1</sup>H NMR (400 MHz, CDCl<sub>3</sub>) δ 7.37 (d, *J* = 8.8 Hz, 2H), 7.35–7.27 (m, 4H), 7.25–7.20 (m, 1H), 7.15 (d, *J* = 7.0 Hz, 1H), 2.56 (q, *J* = 7.6 Hz, 2H), 1.09 (t, *J* = 7.5 Hz, 3H). <sup>13</sup>C NMR (100 MHz,

CDCl<sub>3</sub>)  $\delta$  149.22, 143.09, 142.15, 140.26, 131.67, 130.48, 129.45, 128.86, 126.45, 121.61, 119.48 (q,  $J$  = 321.2 Hz), 26.72, 16.19. <sup>19</sup>F NMR (376 MHz, CDCl<sub>3</sub>)  $\delta$  -72.82. HRMS (ESI)  $m/z$ : [M+Na]<sup>+</sup> calcd. for C<sub>15</sub>H<sub>13</sub>F<sub>3</sub>NaO<sub>3</sub>S, 353.0435; found, 353.0425.

4'-(tert-butyl)-[1,1'-biphenyl]-4-yl trifluoromethanesulfonate (**3f**) <sup>1</sup>H NMR (400 MHz, CDCl<sub>3</sub>)  $\delta$  7.67–7.62 (m, 2H), 7.50 (s, 4H), 7.34 (d,  $J$  = 8.7 Hz, 2H), 1.37 (s, 9H). <sup>13</sup>C NMR (100 MHz, CDCl<sub>3</sub>)  $\delta$  151.24, 148.77, 141.57, 136.39, 128.70, 126.87, 125.99, 121.59, 118.80 (q,  $J$  = 319.0 Hz), 34.64, 31.33. <sup>19</sup>F NMR (376 MHz, CDCl<sub>3</sub>)  $\delta$  -72.78. 4'-methoxy-[1,1'-biphenyl]-4-yl trifluoromethanesulfonate (**3g**) <sup>1</sup>H NMR (400 MHz, CDCl<sub>3</sub>)  $\delta$  7.59 (d,  $J$  = 8.5 Hz, 2H), 7.49 (d,  $J$  = 8.5 Hz, 2H), 7.31 (d,  $J$  = 8.4 Hz, 2H), 6.99 (d,  $J$  = 8.4 Hz, 2H), 3.86 (s, 3H). <sup>13</sup>C NMR (100 MHz, CDCl<sub>3</sub>)  $\delta$  159.71, 148.50, 141.32, 131.76, 128.37, 128.29, 121.60, 118.79 (q,  $J$  = 319.0 Hz), 114.43, 55.40. <sup>19</sup>F NMR (376 MHz, CDCl<sub>3</sub>)  $\delta$  -72.77.

3'-methoxy-[1,1'-biphenyl]-4-yl trifluoromethanesulfonate (**3h**) <sup>1</sup>H NMR (400 MHz, CDCl<sub>3</sub>)  $\delta$  7.61 (d,  $J$  = 8.8 Hz, 2H), 7.38–7.29 (m, 3H), 7.11 (d,  $J$  = 7.3 Hz, 1H), 7.08–7.04 (m, 1H), 6.92 (d,  $J$  = 8.2 Hz, 1H), 3.84 (s, 3H). <sup>13</sup>C NMR (100 MHz, CDCl<sub>3</sub>)  $\delta$  160.72, 149.64, 142.18, 141.37, 130.68, 129.55, 122.24, 120.26, 119.45 (q,  $J$  = 322.2 Hz), 113.95, 113.68, 55.91. <sup>19</sup>F NMR (376 MHz, CDCl<sub>3</sub>)  $\delta$  -72.76.

2'-methoxy-[1,1'-biphenyl]-4-yl trifluoromethanesulfonate (**3i**) <sup>1</sup>H NMR (400 MHz, CDCl<sub>3</sub>)  $\delta$  7.60 (d,  $J$  = 8.8 Hz, 2H), 7.39–7.33 (m, 1H), 7.30 (d,  $J$  = 8.7 Hz, 3H), 7.07–6.98 (m, 2H), 3.82 (s, 3H). <sup>13</sup>C NMR (100 MHz, CDCl<sub>3</sub>)  $\delta$  156.31, 148.49, 138.97, 131.35, 130.76, 129.46, 128.61, 120.99, 120.81, 118.80 (q,  $J$  = 319.0 Hz), 111.28, 55.53. <sup>19</sup>F NMR (376 MHz, CDCl<sub>3</sub>)  $\delta$  -72.83.

4'-(methylthio)-[1,1'-biphenyl]-4-yl trifluoromethanesulfonate (**3j**) <sup>1</sup>H NMR (400 MHz, CDCl<sub>3</sub>)  $\delta$  7.62 (d,  $J$  = 8.8 Hz, 2H), 7.48 (d,  $J$  = 8.4 Hz, 2H), 7.33 (d,  $J$  = 8.5 Hz, 4H), 2.52 (d,  $J$  = 3.5 Hz, 3H). <sup>13</sup>C NMR (100 MHz, CDCl<sub>3</sub>)  $\delta$  148.82, 141.03, 138.90, 135.87, 128.54, 127.50, 126.78, 121.72, 118.79 (q,  $J$  = 319.0 Hz), 15.64. <sup>19</sup>F NMR (376 MHz, CDCl<sub>3</sub>)  $\delta$  -72.75. HRMS (ESI)  $m/z$ : [M+H]<sup>+</sup> calcd. for C<sub>14</sub>H<sub>12</sub>F<sub>3</sub>O<sub>3</sub>S<sub>2</sub>, 349.0180; found, 349.0183.

4'-ethoxy-[1,1'-biphenyl]-4-yl trifluoromethanesulfonate (**3k**) <sup>1</sup>H NMR (400 MHz, CDCl<sub>3</sub>)  $\delta$  7.59 (d,  $J$  = 8.7 Hz, 2H), 7.48 (d,  $J$  = 8.6 Hz, 2H), 7.31 (d,  $J$  = 8.7 Hz, 2H), 6.98 (d,  $J$  = 8.7 Hz, 2H), 4.08 (d,  $J$  = 7.0 Hz, 2H), 1.45 (t,  $J$  = 7.0 Hz, 3H). <sup>13</sup>C NMR (100 MHz, CDCl<sub>3</sub>)  $\delta$  159.10, 148.47, 141.36, 131.56, 128.33, 128.25, 121.58, 118.80 (q,  $J$  = 319.0 Hz), 114.95, 63.59, 14.85. <sup>19</sup>F NMR (376 MHz, CDCl<sub>3</sub>)  $\delta$  -72.77.

4'-phenoxy-[1,1'-biphenyl]-4-yl trifluoromethanesulfonate (**3l**)  $^1\text{H}$  NMR (400 MHz,  $\text{CDCl}_3$ )  $\delta$  7.62 (d,  $J = 8.7$  Hz, 2H), 7.52 (d,  $J = 8.6$  Hz, 2H), 7.39 (t,  $J = 7.9$  Hz, 2H), 7.34 (d,  $J = 8.7$  Hz, 2H), 7.16 (t,  $J = 7.4$  Hz, 1H), 7.09 (dd,  $J = 8.0, 6.4$  Hz, 4H).  $^{13}\text{C}$  NMR (100 MHz,  $\text{CDCl}_3$ )  $\delta$  157.67, 156.77, 148.76, 141.06, 134.14, 129.92, 128.60, 128.56, 123.75, 121.69, 119.30, 119.02, 118.82 (q,  $J = 319.0$  Hz).  $^{19}\text{F}$  NMR (376 MHz,  $\text{CDCl}_3$ )  $\delta$  -72.75. HRMS (ESI)  $m/z$ :  $[\text{M}+\text{H}]^+$  calcd. for  $\text{C}_{19}\text{H}_{14}\text{F}_3\text{O}_4\text{S}$ , 395.0565; found, 395.0556.

4'-(trifluoromethyl)-[1,1'-biphenyl]-4-yl trifluoromethanesulfonate (**3m**)  $^1\text{H}$  NMR (400 MHz,  $\text{CDCl}_3$ )  $\delta$  7.73 (d,  $J = 8.3$  Hz, 2H), 7.66 (d,  $J = 8.8$  Hz, 4H), 7.39 (dd,  $J = 6.7, 4.8$  Hz, 2H).  $^{13}\text{C}$  NMR (400 MHz,  $\text{CDCl}_3$ )  $\delta$  149.50, 142.78, 140.23, 129.83, 129.16, 127.57, 126.01, 124.10 (q,  $J = 270.0$  Hz), 121.98, 118.78 (q,  $J = 319.0$  Hz).  $^{19}\text{F}$  NMR (376 MHz,  $\text{CDCl}_3$ )  $\delta$  -62.55, -72.73.

4'-fluoro-[1,1'-biphenyl]-4-yl trifluoromethanesulfonate (**3n**)  $^1\text{H}$  NMR (400 MHz,  $\text{CDCl}_3$ )  $\delta$  7.59 (d,  $J = 8.7$  Hz, 2H), 7.55–7.48 (m, 2H), 7.34 (d,  $J = 8.7$  Hz, 2H), 7.15 (t,  $J = 8.6$  Hz, 2H).  $^{13}\text{C}$  NMR (100 MHz,  $\text{CDCl}_3$ )  $\delta$  162.86 (d,  $J = 247.8$  Hz), 148.92, 140.73, 128.83, 128.79, 121.75, 118.79 (q,  $J = 319.0$  Hz), 116.08, 115.87.  $^{19}\text{F}$  NMR (376 MHz,  $\text{CDCl}_3$ )  $\delta$  -72.76, -114.34.

3',5'-bis(trifluoromethyl)-[1,1'-biphenyl]-4-yl trifluoromethanesulfonate (**3o**)  $^1\text{H}$  NMR (400 MHz,  $\text{CDCl}_3$ )  $\delta$  7.99 (s, 2H), 7.92 (s, 1H), 7.69 (d,  $J = 8.8$  Hz, 2H), 7.44 (d,  $J = 8.7$  Hz, 2H).  $^{13}\text{C}$  NMR (100 MHz,  $\text{CDCl}_3$ )  $\delta$  150.66, 142.13, 139.39, 133.19 (q,  $J = 34.0$  Hz), 129.94, 128.06, 123.92 (q,  $J = 272.0$  Hz), 123.02, 122.48, 119.50 (q,  $J = 322.2$  Hz).  $^{19}\text{F}$  NMR (376 MHz,  $\text{CDCl}_3$ )  $\delta$  -62.91, -72.73.

4'-chloro-[1,1'-biphenyl]-4-yl trifluoromethanesulfonate (**3p**)  $^1\text{H}$  NMR (400 MHz,  $\text{CDCl}_3$ )  $\delta$  7.61 (d,  $J = 8.7$  Hz, 2H), 7.49 (d,  $J = 8.6$  Hz, 2H), 7.43 (d,  $J = 8.5$  Hz, 2H), 7.35 (d,  $J = 8.7$  Hz, 2H).  $^{13}\text{C}$  NMR (100 MHz,  $\text{CDCl}_3$ )  $\delta$  149.10, 140.48, 137.73, 134.34, 129.21, 128.79, 128.46, 121.83, 118.78 (q,  $J = 319.0$  Hz).  $^{19}\text{F}$  NMR (376 MHz,  $\text{CDCl}_3$ )  $\delta$  -72.74.

methyl 4'-(((trifluoromethyl)sulfonyl)oxy)-[1,1'-biphenyl]-4-carboxylate (**3q**)  $^1\text{H}$  NMR (400 MHz,  $\text{CDCl}_3$ )  $\delta$  8.13 (d,  $J = 8.4$  Hz, 2H), 7.68 (d,  $J = 8.8$  Hz, 2H), 7.63 (d,  $J = 8.4$  Hz, 2H), 7.38 (d,  $J = 8.7$  Hz, 2H), 3.95 (s, 3H).  $^{13}\text{C}$  NMR (100 MHz,  $\text{CDCl}_3$ )  $\delta$  166.78, 149.45, 143.59, 140.50, 130.31, 129.70, 129.13, 127.19, 121.89, 118.78 (q,  $J = 319.0$  Hz), 52.30.  $^{19}\text{F}$  NMR (376 MHz,  $\text{CDCl}_3$ )  $\delta$  -72.73.

[1,1'-biphenyl]-4-yl trifluoromethanesulfonate (**3r**)  $^1\text{H}$  NMR (400 MHz,  $\text{CDCl}_3$ )  $\delta$  7.65 (d,  $J = 8.7$  Hz, 2H), 7.56 (d,  $J = 7.5$  Hz, 2H), 7.47 (t,  $J = 7.5$  Hz, 2H), 7.40 (d,  $J = 7.3$



Hz, 1H), 7.35 (d,  $J = 8.7$  Hz, 2H).  $^{13}\text{C}$  NMR (100 MHz,  $\text{CDCl}_3$ )  $\delta$  148.95, 141.72, 139.31, 129.02, 128.91, 128.09, 127.22, 121.66, 118.80 (q,  $J = 319.0$  Hz).  $^{19}\text{F}$  NMR (376 MHz,  $\text{CDCl}_3$ )  $\delta$  -72.76.

4-(benzofuran-2-yl)phenyl trifluoromethanesulfonate (**3s**)  $^1\text{H}$  NMR (400 MHz,  $\text{CDCl}_3$ )  $\delta$  7.88 (d,  $J = 8.9$  Hz, 2H), 7.58 (d,  $J = 8.6$  Hz, 1H), 7.51 (d,  $J = 9.0$  Hz, 1H), 7.31 (m, 3H), 7.27–7.21 (m, 1H), 7.02 (s, 1H).  $^{13}\text{C}$  NMR (100 MHz,  $\text{CDCl}_3$ )  $\delta$  155.73, 154.44, 149.84, 131.48, 129.52, 127.21, 125.66, 123.94, 122.52, 121.92, 119.44 (q,  $J = 322.0$  Hz), 111.97, 103.44.  $^{19}\text{F}$  NMR (376 MHz,  $\text{CDCl}_3$ )  $\delta$  -72.70. HRMS (ESI)  $m/z$ :  $[\text{M}+\text{H}]^+$  calcd. for  $\text{C}_{15}\text{H}_{10}\text{F}_3\text{O}_4\text{S}$ , 343.0252; found, 343.0260.

4-(thiophen-3-yl)phenyl trifluoromethanesulfonate (**3t**)  $^1\text{H}$  NMR (400 MHz,  $\text{CDCl}_3$ )  $\delta$  7.65 (d,  $J = 8.8$  Hz, 2H), 7.48 (dd,  $J = 2.9, 1.3$  Hz, 1H), 7.42 (dd,  $J = 5.0, 3.0$  Hz, 1H), 7.36 (dd,  $J = 5.0, 1.2$  Hz, 1H), 7.30 (d,  $J = 8.8$  Hz, 2H).  $^{13}\text{C}$  NMR (100 MHz,  $\text{CDCl}_3$ )  $\delta$  148.53, 140.39, 136.30, 128.10, 126.92, 126.14, 121.74, 121.52, 118.78 (q,  $J = 319.0$  Hz).  $^{19}\text{F}$  NMR (376 MHz,  $\text{CDCl}_3$ )  $\delta$  -72.74. HRMS (ESI)  $m/z$ :  $[\text{M}+\text{H}]^+$  calcd. for  $\text{C}_{11}\text{H}_8\text{F}_3\text{O}_3\text{S}_2$ , 308.9867; found, 308.9857.

4-(naphthalen-1-yl)phenyl trifluoromethanesulfonate (**3u**)  $^1\text{H}$  NMR (400 MHz,  $\text{CDCl}_3$ )  $\delta$  7.92–7.84 (m, 2H), 7.77 (d,  $J = 8.0$  Hz, 1H), 7.54–7.48 (m, 3H), 7.48–7.40 (m, 2H), 7.39–7.32 (m, 3H).  $^{13}\text{C}$  NMR (100 MHz,  $\text{CDCl}_3$ )  $\delta$  149.53, 141.88, 138.76, 134.46, 132.47, 131.94, 129.11 (d,  $J = 4.0$  Hz), 128.55, 127.80, 127.16, 126.74, 126.48, 126.03 (d,  $J = 7.0$  Hz), 121.90, 119.53 (q,  $J = 322.2$  Hz).  $^{19}\text{F}$  NMR (376 MHz,  $\text{CDCl}_3$ )  $\delta$  -72.75. 4'-methoxy-[1,1'-biphenyl]-3-yl trifluoromethanesulfonate (**3v**)  $^1\text{H}$  NMR (400 MHz,  $\text{CDCl}_3$ )  $\delta$  7.57 (d,  $J = 7.9$  Hz, 1H), 7.54–7.46 (m, 3H), 7.47–7.42 (m, 1H), 7.20 (dd,  $J = 8.1, 1.7$  Hz, 1H), 7.00 (d,  $J = 8.8$  Hz, 2H), 3.86 (s, 3H).  $^{13}\text{C}$  NMR (100 MHz,  $\text{CDCl}_3$ )  $\delta$  159.94, 150.07, 143.59, 131.46, 130.46, 128.29, 126.58, 119.45, 119.15, 118.80 (q,  $J = 319.0$  Hz), 114.49, 55.41.  $^{19}\text{F}$  NMR (376 MHz,  $\text{CDCl}_3$ )  $\delta$  -72.82.

4'-methyl-[1,1'-biphenyl]-3-yl trifluoromethanesulfonate (**3w**)  $^1\text{H}$  NMR (400 MHz,  $\text{CDCl}_3$ )  $\delta$  7.60 (d,  $J = 7.8$  Hz, 1H), 7.49 (m, 4H), 7.28 (d,  $J = 7.9$  Hz, 2H), 7.23 (dd,  $J = 8.1, 2.0$  Hz, 1H), 2.42 (s, 3H).  $^{13}\text{C}$  NMR (100 MHz,  $\text{CDCl}_3$ )  $\delta$  150.05, 143.93, 138.37, 136.15, 130.46, 129.80, 127.02, 126.86, 119.75, 119.52, 118.80 (q,  $J = 319.0$  Hz), 21.17.  $^{19}\text{F}$  NMR (376 MHz,  $\text{CDCl}_3$ )  $\delta$  -72.80.

2'-methyl-[1,1'-biphenyl]-3-yl trifluoromethanesulfonate (**3x**)  $^1\text{H}$  NMR (400 MHz,

CDCl<sub>3</sub>)  $\delta$  7.49 (t,  $J$  = 8.0 Hz, 1H), 7.35 (d,  $J$  = 7.6 Hz, 1H), 7.31–7.23 (m, 5H), 7.20 (d,  $J$  = 7.2 Hz, 1H), 2.26 (s, 3H). <sup>13</sup>C NMR (100 MHz, CDCl<sub>3</sub>)  $\delta$  149.36, 144.55, 139.67, 135.27, 130.64, 129.93, 129.61, 129.27, 128.18, 126.08, 122.14, 119.64, 118.81 (q,  $J$  = 319.0 Hz), 20.29. <sup>19</sup>F NMR (376 MHz, CDCl<sub>3</sub>)  $\delta$  -72.80.

[1,1'-biphenyl]-3-yl trifluoromethanesulfonate (**3y**) <sup>1</sup>H NMR (400 MHz, CDCl<sub>3</sub>)  $\delta$  7.61 (d,  $J$  = 7.8 Hz, 1H), 7.59–7.55 (m, 2H), 7.53 (d,  $J$  = 8.1 Hz, 1H), 7.48 (t,  $J$  = 7.9 Hz, 3H), 7.41 (t,  $J$  = 7.2 Hz, 1H), 7.26 (d,  $J$  = 4.2 Hz, 1H). <sup>13</sup>C NMR (100 MHz, CDCl<sub>3</sub>)  $\delta$  150.03, 143.99, 139.03, 130.53, 129.09, 128.38, 127.20, 127.10, 120.00, 119.85, 118.80 (q,  $J$  = 319.0 Hz). <sup>19</sup>F NMR (376 MHz, CDCl<sub>3</sub>)  $\delta$  -72.78.

4'-methoxy-[1,1'-biphenyl]-2-yl trifluoromethanesulfonate (**3z**) <sup>1</sup>H NMR (400 MHz, CDCl<sub>3</sub>)  $\delta$  7.46–7.41 (m, 2H), 7.42–7.35 (m, 4H), 6.99 (d,  $J$  = 8.7 Hz, 2H), 3.86 (s, 3H). <sup>13</sup>C NMR (100 MHz, CDCl<sub>3</sub>)  $\delta$  159.67, 146.94, 135.26, 131.94, 130.59, 128.54, 127.92, 122.09, 119.97, 118.38 (q,  $J$  = 318.0 Hz), 113.98, 55.32. <sup>19</sup>F NMR (376 MHz, CDCl<sub>3</sub>)  $\delta$  -74.04.

2'-methoxy-[1,1'-biphenyl]-2-yl trifluoromethanesulfonate (**4a**) <sup>1</sup>H NMR (400 MHz, CDCl<sub>3</sub>)  $\delta$  7.47–7.38 (m, 4H), 7.34 (ddd,  $J$  = 7.8, 4.8, 2.6 Hz, 1H), 7.24 (dd,  $J$  = 7.5, 1.6 Hz, 1H), 7.07–6.97 (m, 2H), 3.79 (s, 3H). <sup>13</sup>C NMR (100 MHz, CDCl<sub>3</sub>)  $\delta$  157.27, 148.45, 133.17, 131.98, 130.80, 130.11, 129.67, 128.77, 125.28, 121.83, 121.22, 119.04 (q,  $J$  = 318.0 Hz), 111.46, 56.05. <sup>19</sup>F NMR (376 MHz, CDCl<sub>3</sub>)  $\delta$  -74.61.

4'-methoxy-5-methyl-[1,1'-biphenyl]-2-yl trifluoromethanesulfonate (**4b**) <sup>1</sup>H NMR (400 MHz, CDCl<sub>3</sub>)  $\delta$  7.38 (d,  $J$  = 8.8 Hz, 2H), 7.24 (t,  $J$  = 6.5 Hz, 2H), 7.16 (dd,  $J$  = 8.4, 1.6 Hz, 1H), 6.97 (d,  $J$  = 8.8 Hz, 2H), 3.85 (s, 3H), 2.40 (s, 3H). <sup>13</sup>C NMR (100 MHz, CDCl<sub>3</sub>)  $\delta$  159.61, 144.90, 138.55, 134.84, 132.40, 130.53, 129.01, 128.12, 121.76, 118.40 (q,  $J$  = 318.0 Hz), 113.94, 55.30, 20.94. <sup>19</sup>F NMR (376 MHz, CDCl<sub>3</sub>)  $\delta$  -72.82.

3-(4'-methyl-[1,1'-biphenyl]-4-yl)thiophene (**5a**) <sup>1</sup>H NMR (400 MHz, CDCl<sub>3</sub>)  $\delta$  7.65 (q,  $J$  = 8.4 Hz, 4H), 7.52 (d,  $J$  = 8.1 Hz, 2H), 7.49–7.46 (m, 1H), 7.44–7.37 (m, 2H), 7.24 (s, 2H), 2.39 (s, 3H). <sup>13</sup>C NMR (100 MHz, CDCl<sub>3</sub>)  $\delta$  142.64, 140.52, 138.46, 137.82, 135.21, 130.22, 127.97, 127.47, 126.97, 126.95, 120.86, 100.66, 21.81. HRMS (ESI)  $m/z$ : [M+H]<sup>+</sup> calcd. for C<sub>17</sub>H<sub>15</sub>S, 251.0894; found, 251.0889.

2-(4'-methyl-[1,1'-biphenyl]-4-yl)benzofuran (**5b**) <sup>1</sup>H NMR (400 MHz, CDCl<sub>3</sub>)  $\delta$  7.84 (d,  $J$  = 8.8 Hz, 2H), 7.61 (d,  $J$  = 7.6 Hz, 2H), 7.53 (m, 1H), 7.48 (m, 3H), 7.18 (m, 4H),

6.98 (s, 1H), 2.34 (s, 3H).  $^{13}\text{C}$  NMR (100 MHz,  $\text{CDCl}_3$ )  $\delta$  156.45, 155.59, 141.85, 138.20, 138.14, 130.28, 129.97, 129.77, 127.91, 127.49, 125.99, 124.93, 123.63, 121.55, 111.85, 101.96, 21.84.

4-fluoro-4"-methyl-1,1':4',1"-terphenyl (**5c**)  $^1\text{H}$  NMR (400 MHz,  $\text{CDCl}_3$ )  $\delta$  7.53 (m, 8H), 7.20 (m, 2H), 7.06 (m, 2H), 2.33 (s, 3H).  $^{13}\text{C}$  NMR (100 MHz,  $\text{CDCl}_3$ )  $\delta$  162.50 (d,  $J = 244.0$  Hz), 140.09, 138.86, 137.71, 137.26, 136.91, 129.60, 128.54, 127.38, 127.35, 115.81, 115.60, 21.18. HRMS (ESI)  $m/z$ :  $[\text{M}+\text{H}]^+$  calcd. for  $\text{C}_{19}\text{H}_{16}\text{F}_2$ , 263.1236; found, 263.1238.

## 5. NMR spectrums of the catalysts and reaction products

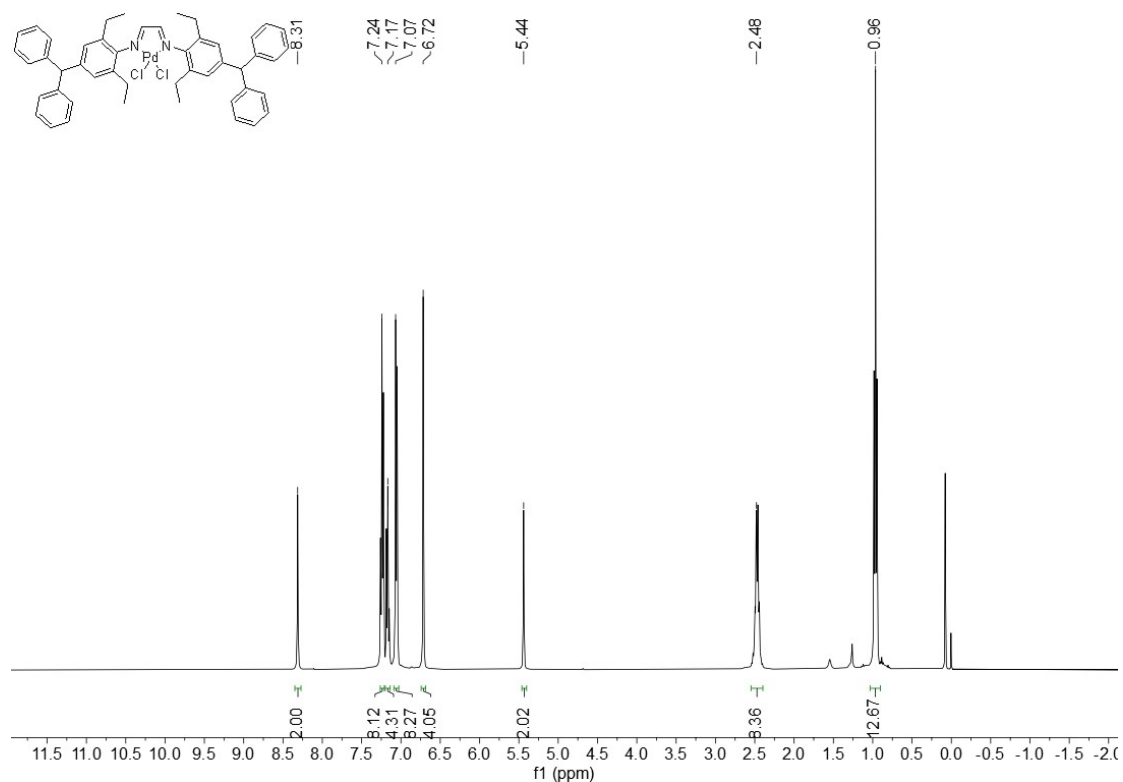

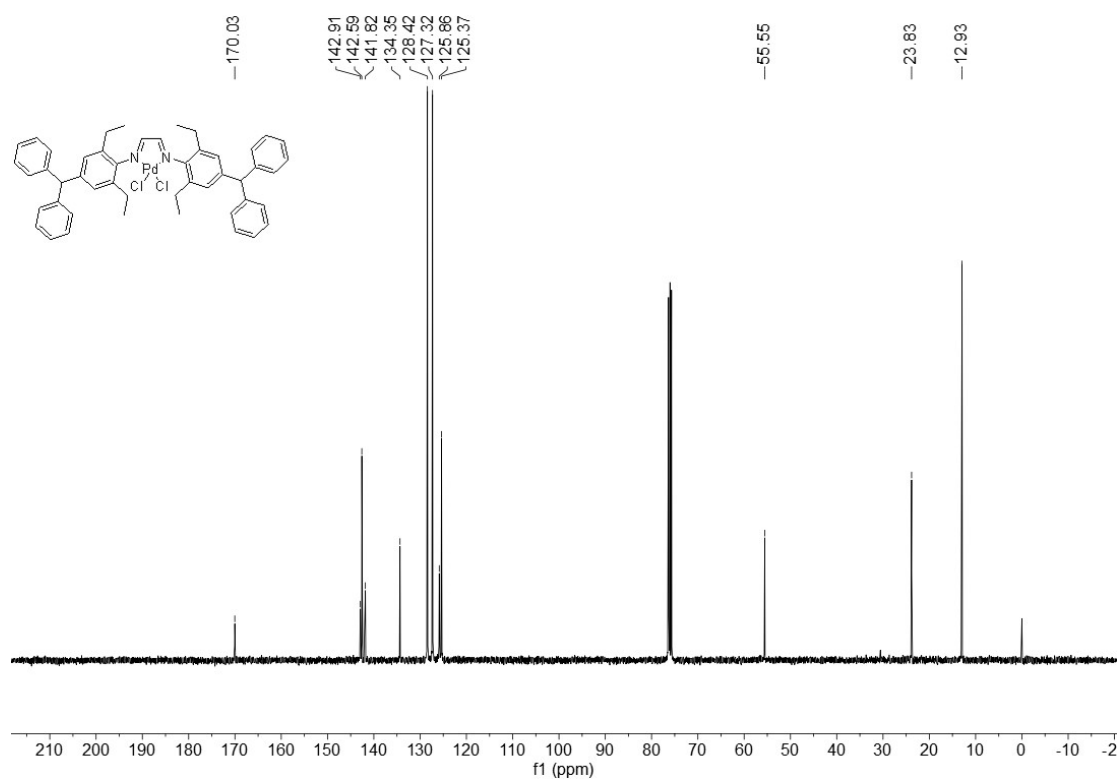

Figure S1. The NMR spectrums of **C1**

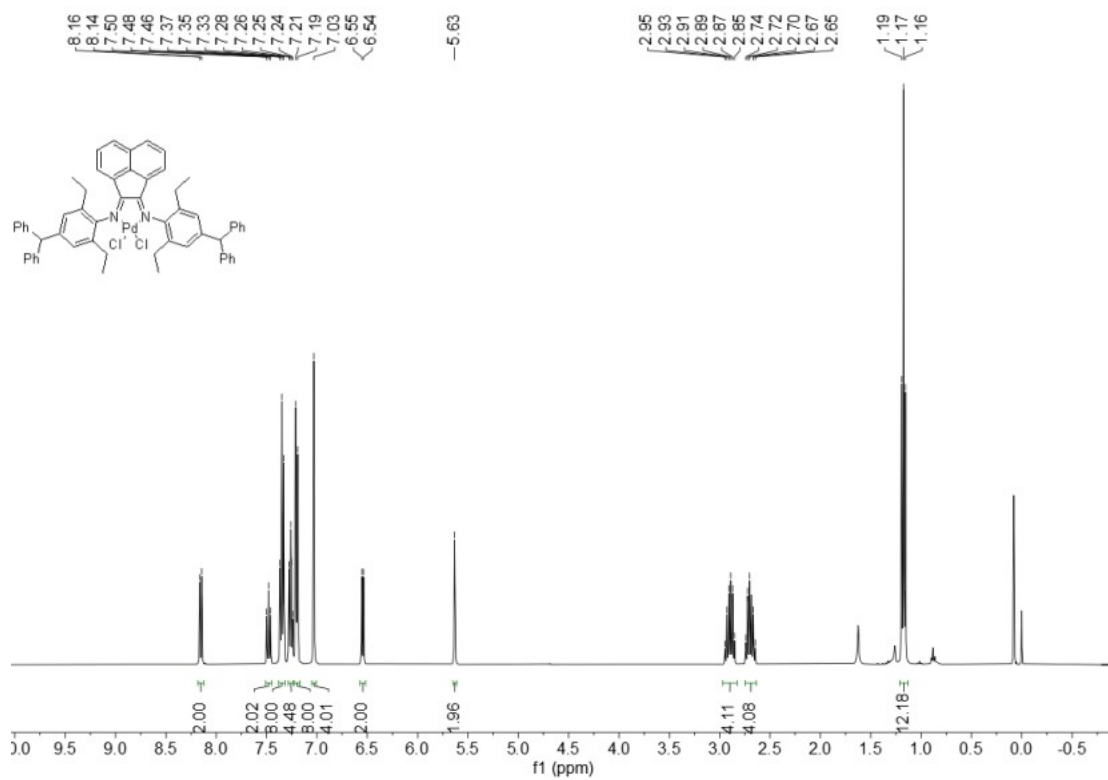

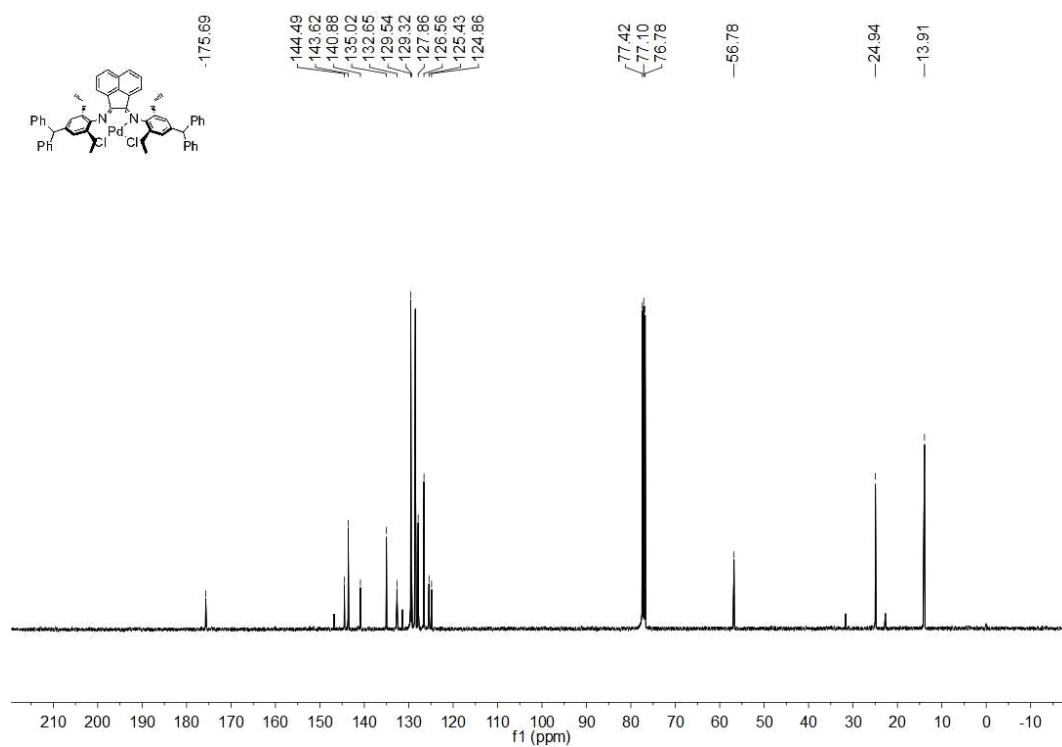

Figure S2. The NMR spectrums of **C2**

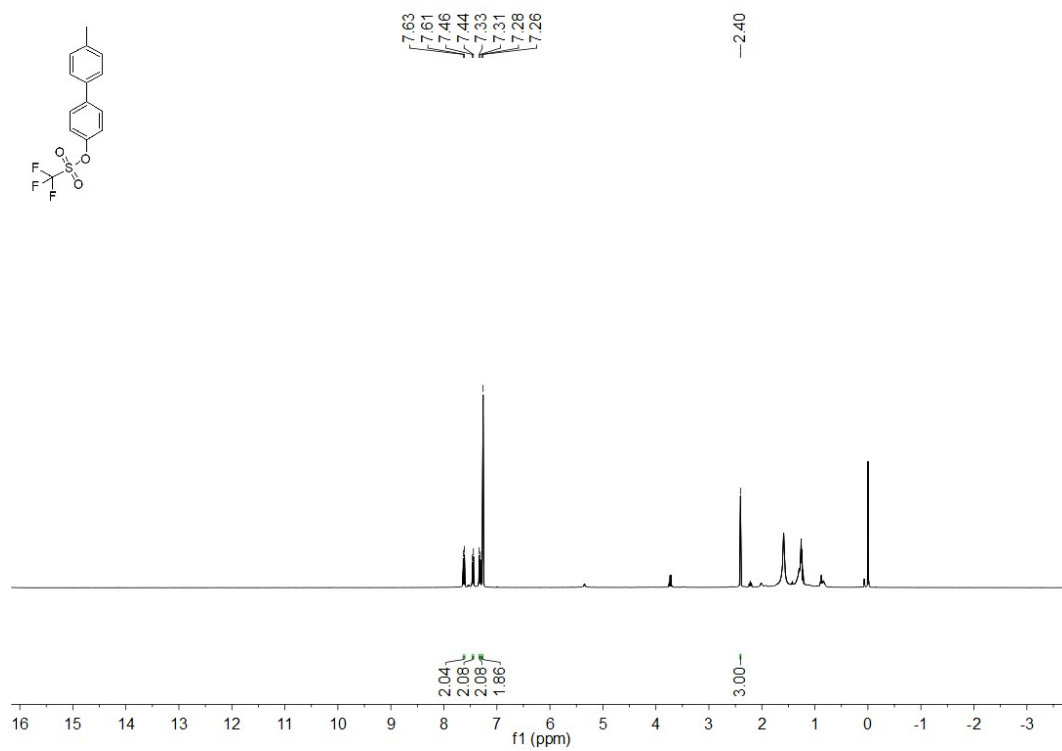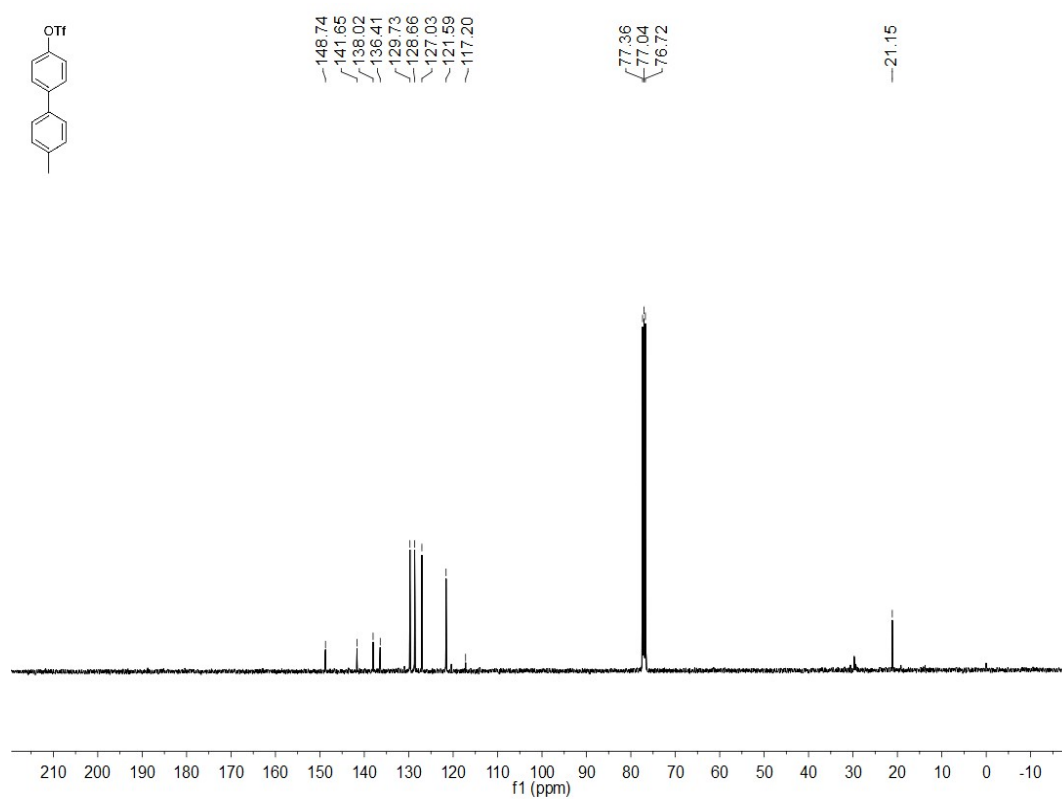

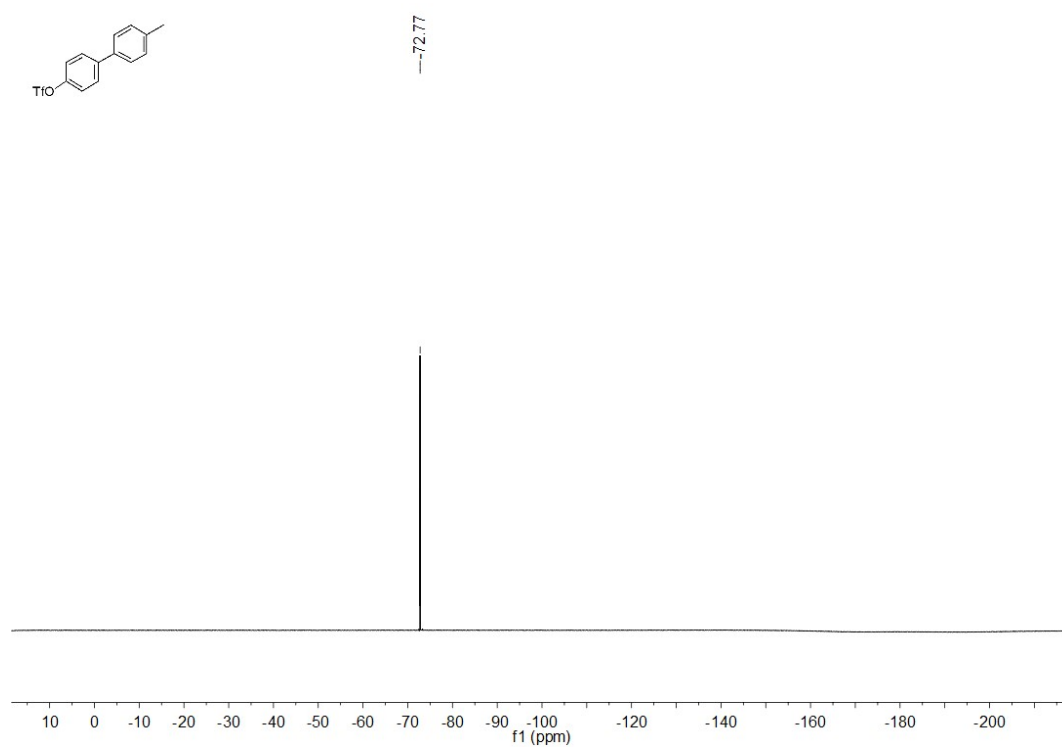

Figure S3. The NMR spectra of **3a**

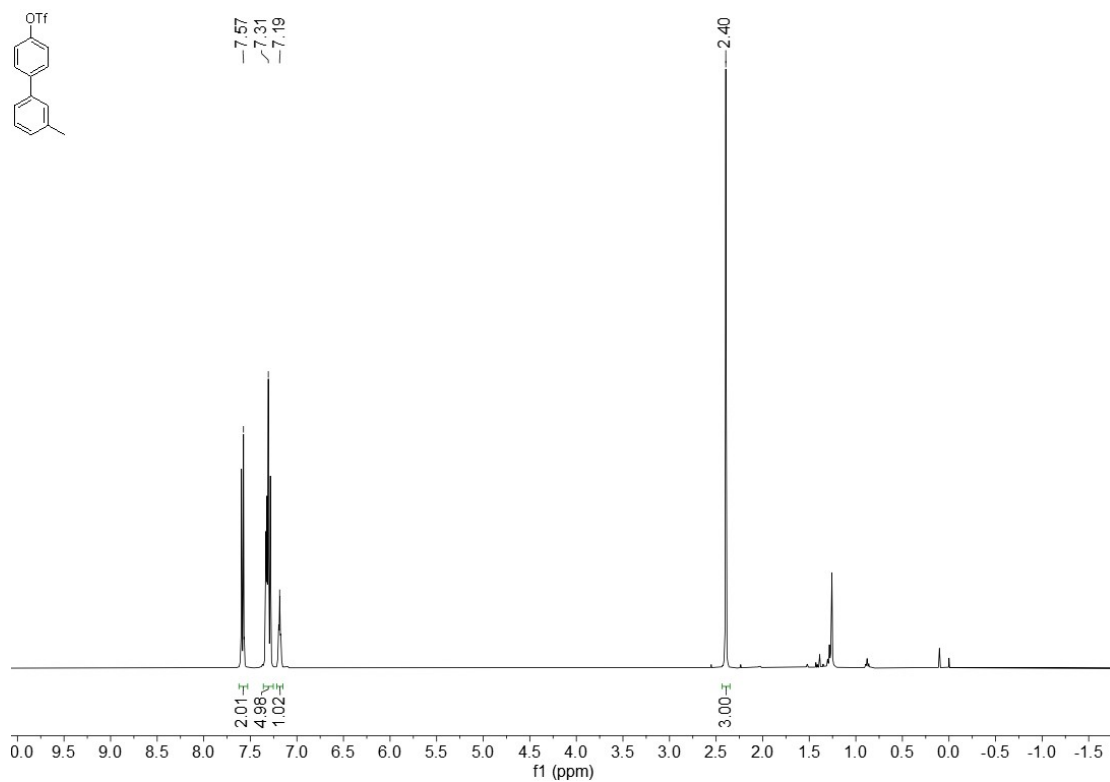

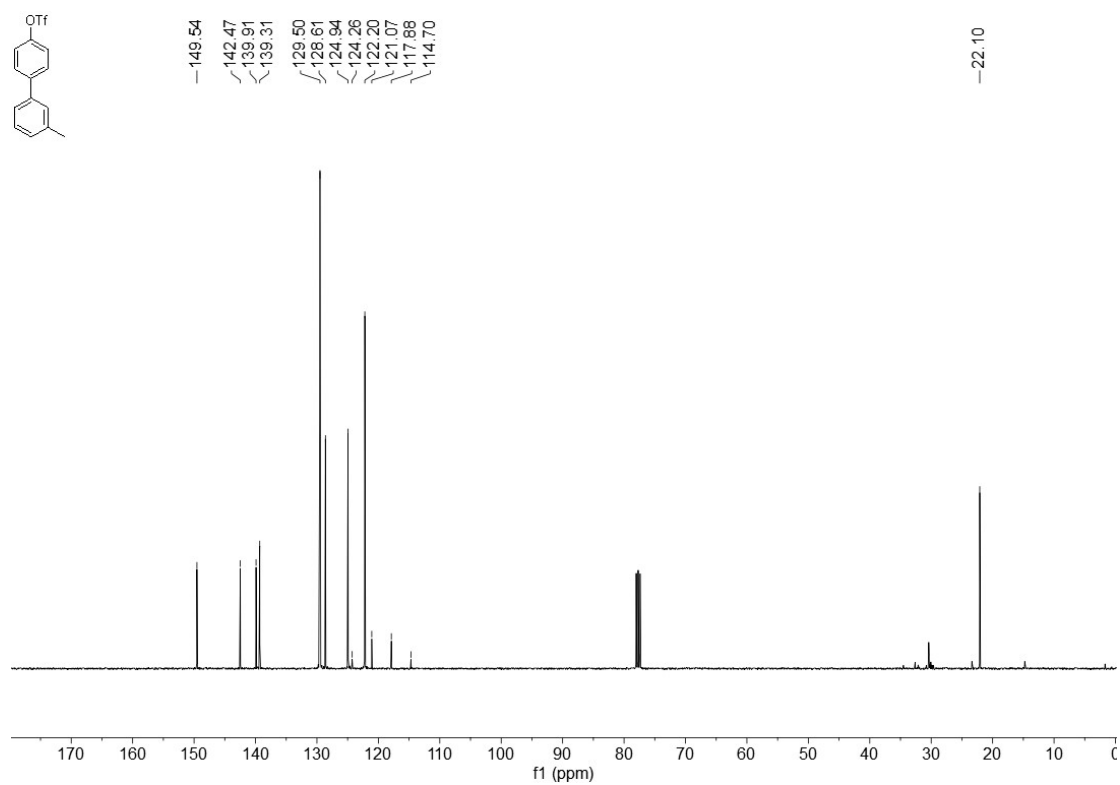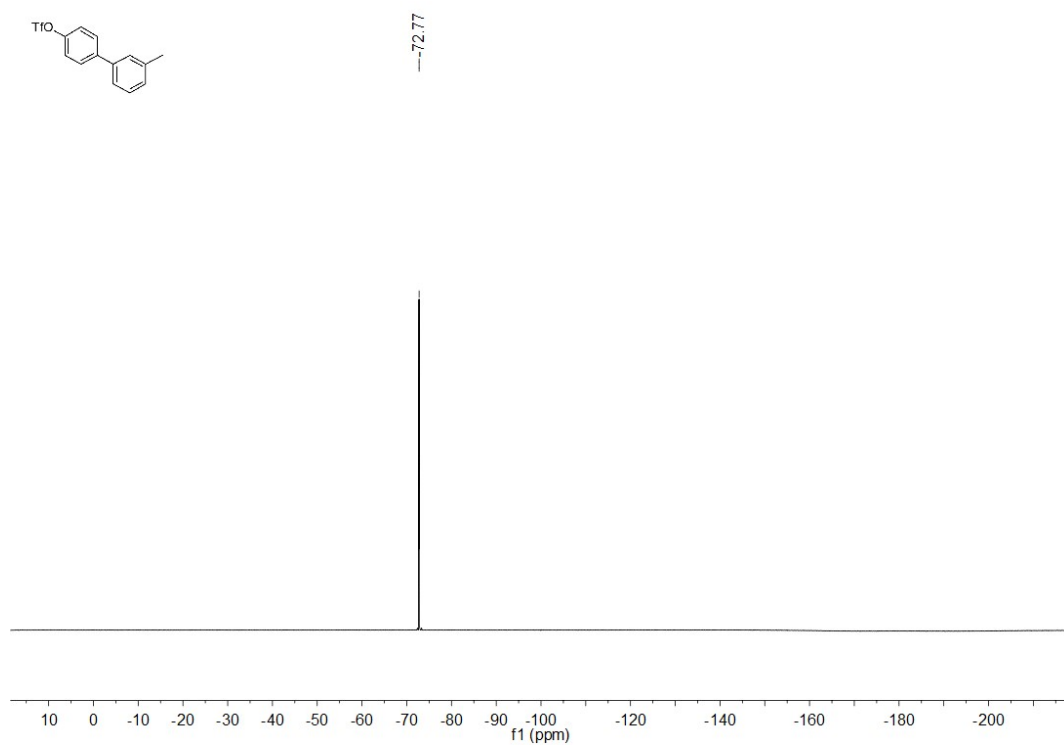

Figure S4. The NMR spectra of **3b**



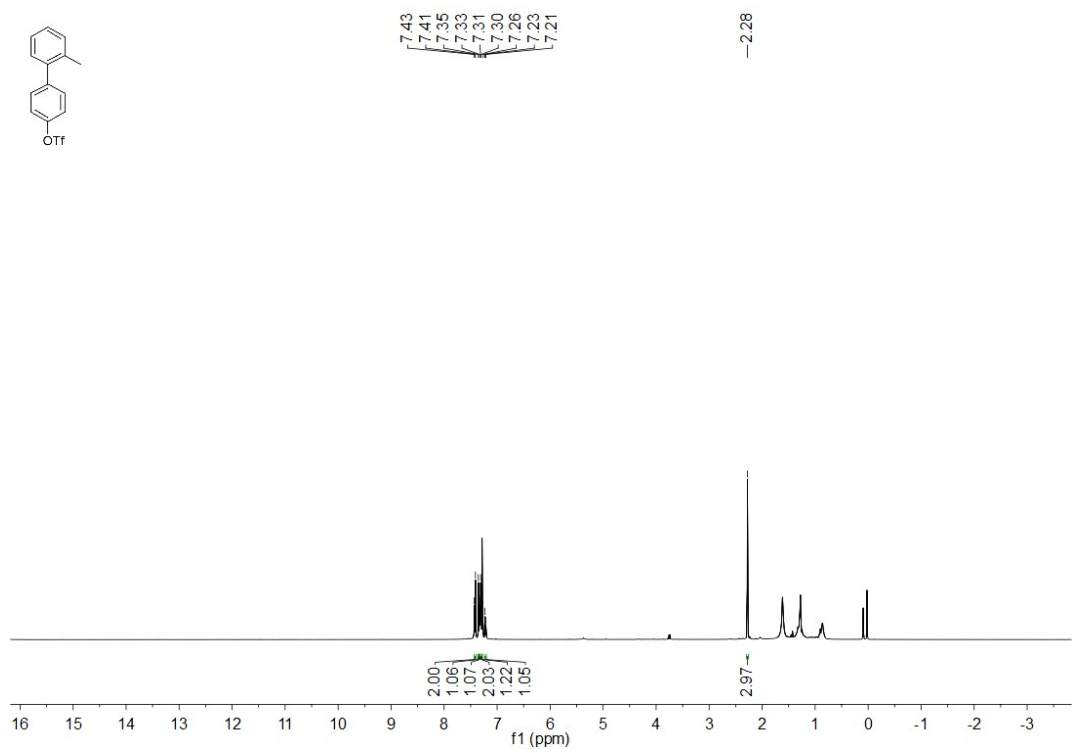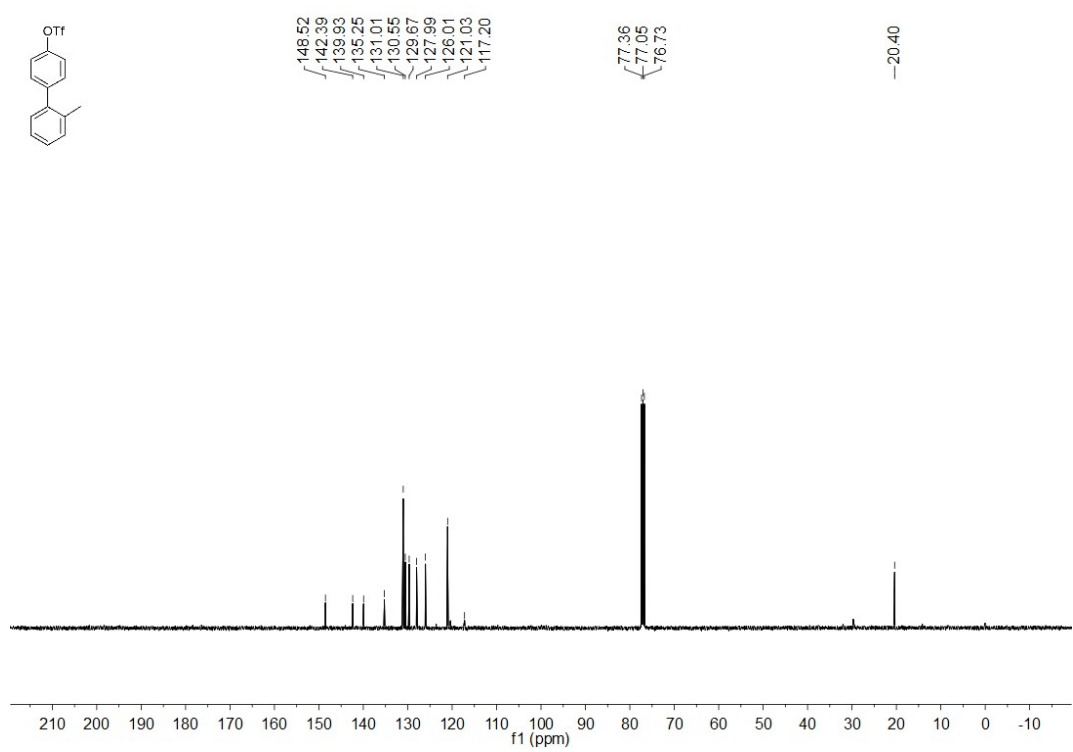

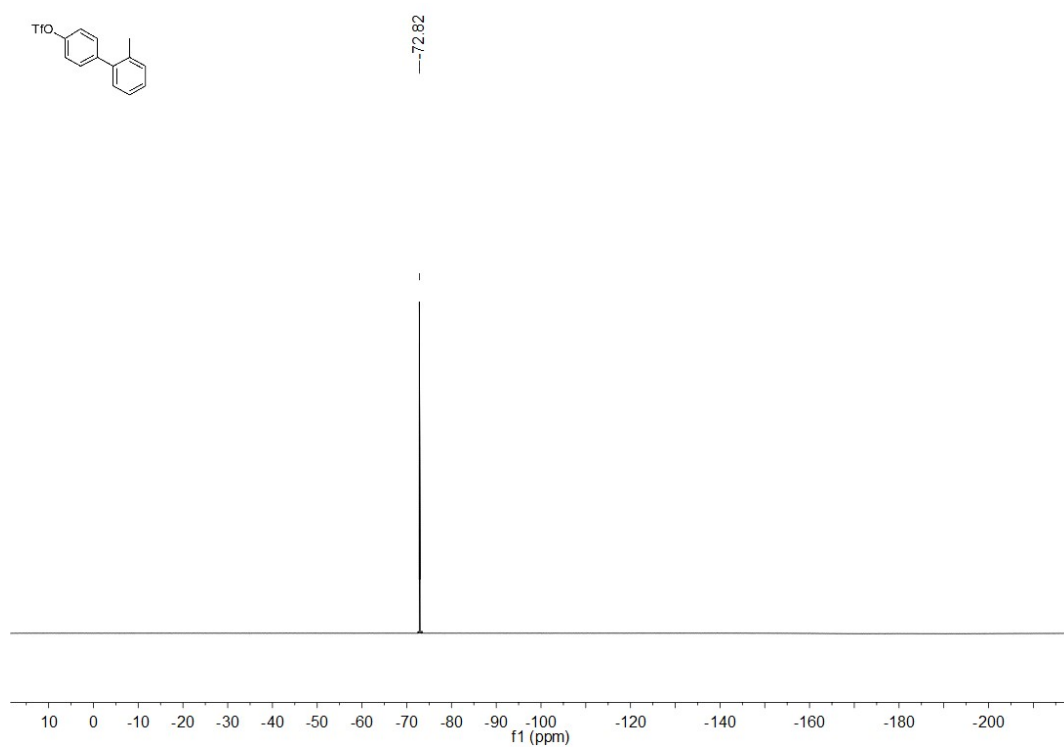

Figure S5. The NMR spectra of **3c**

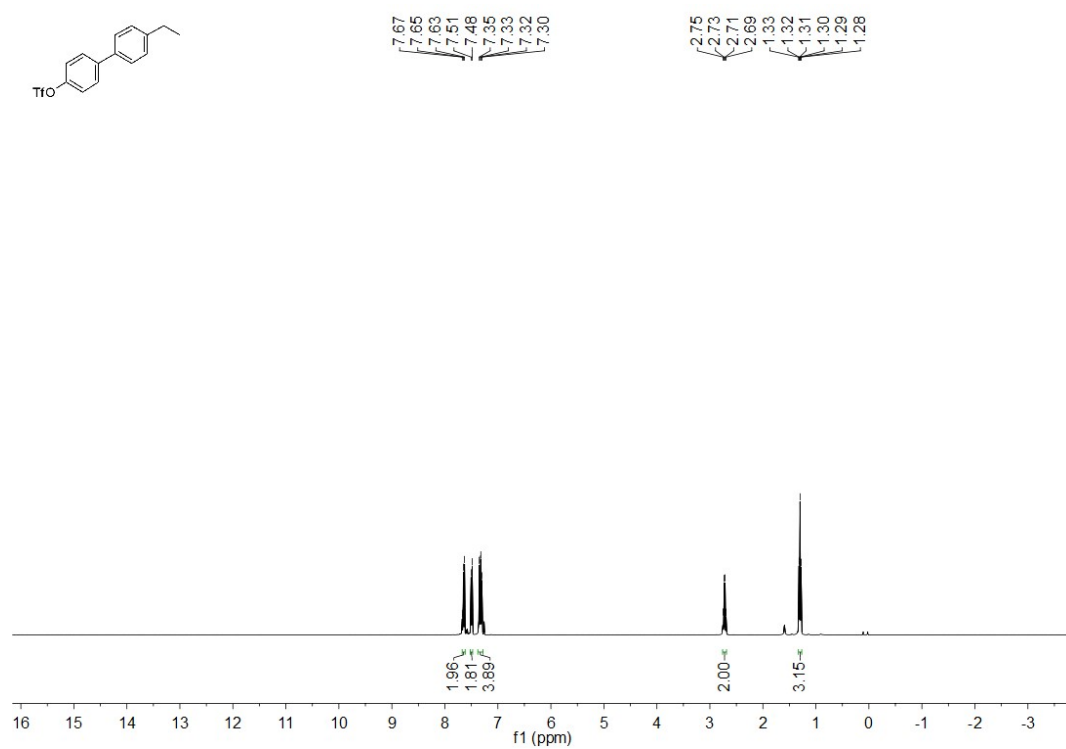

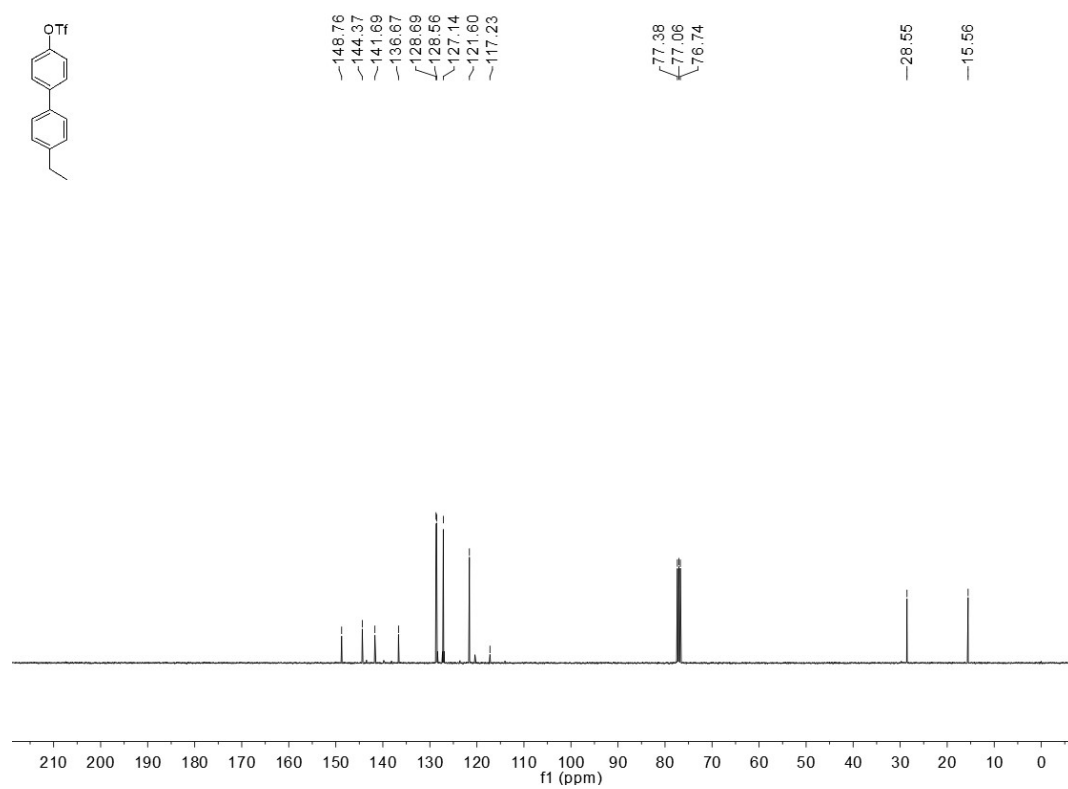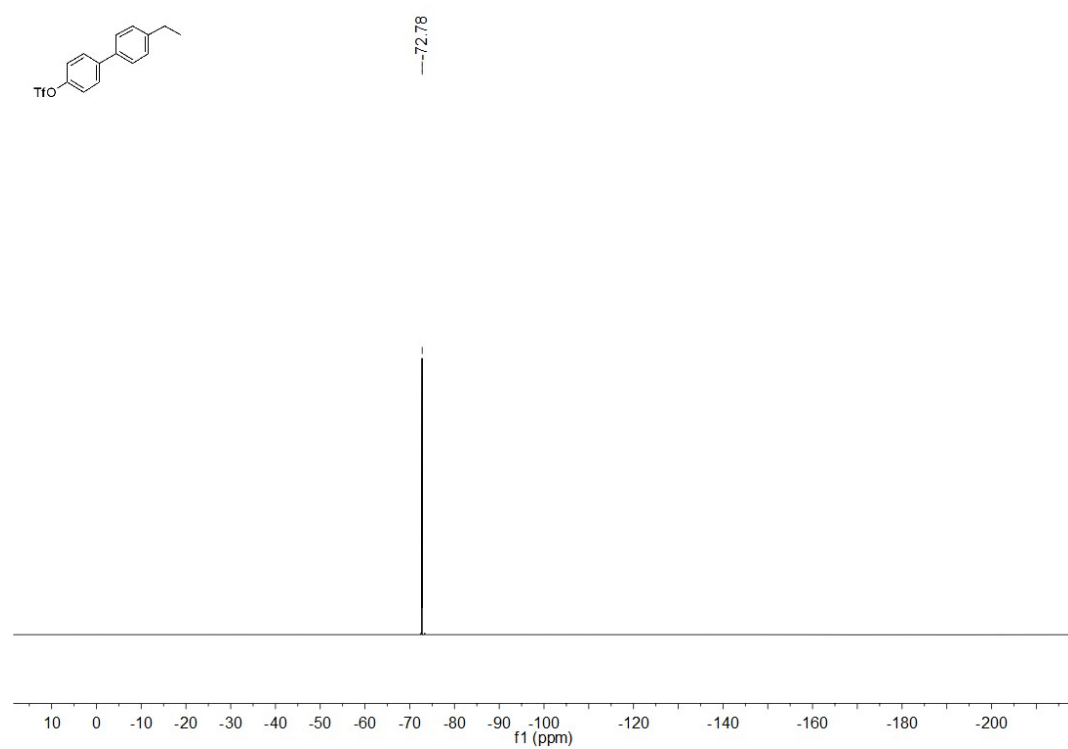

Figure S6. The NMR spectra of **3d**

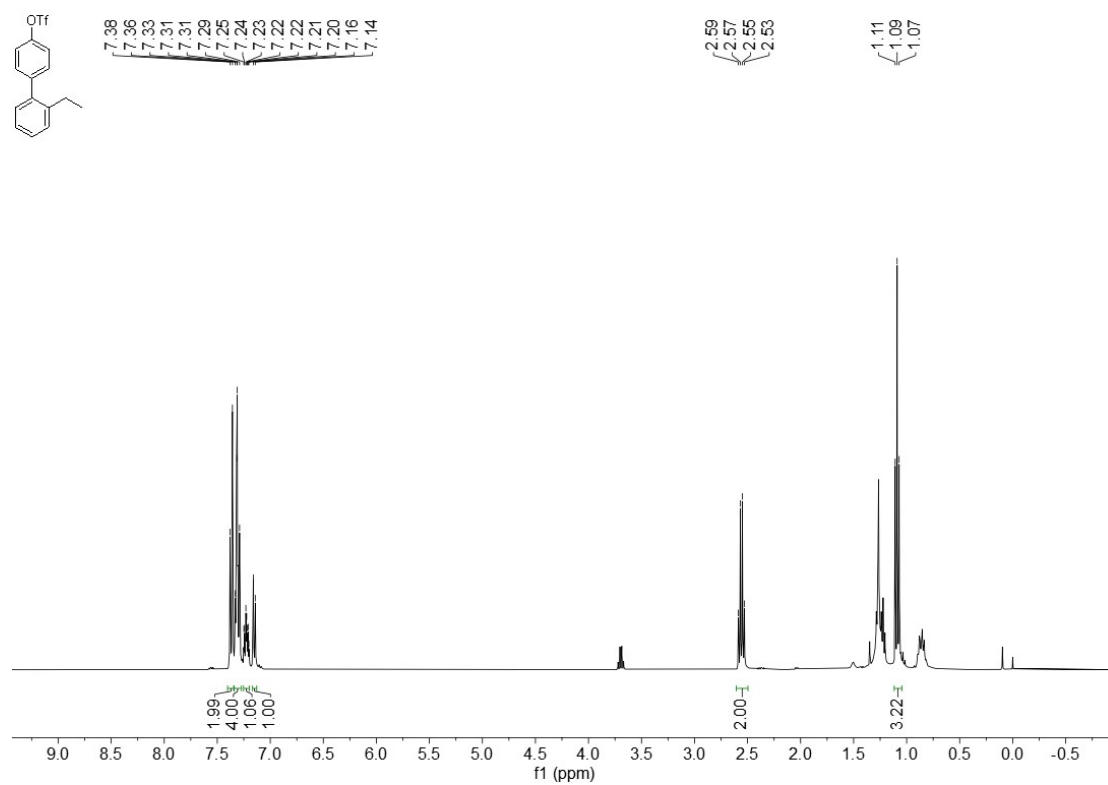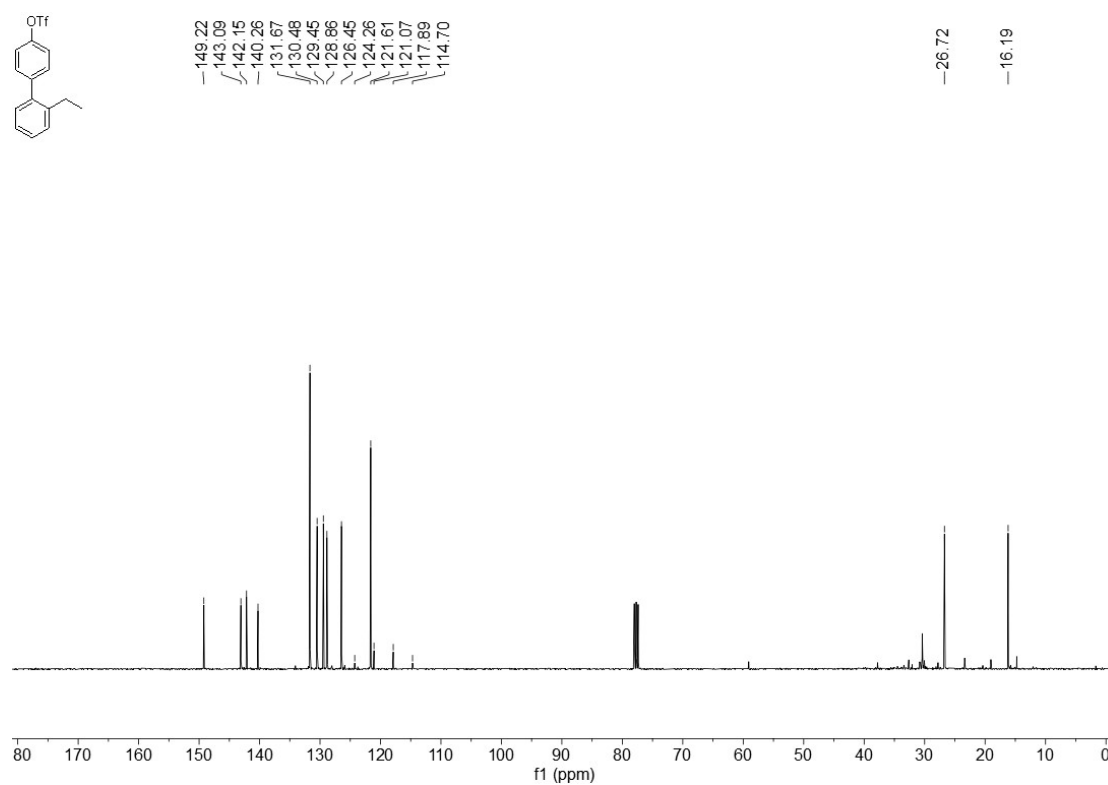

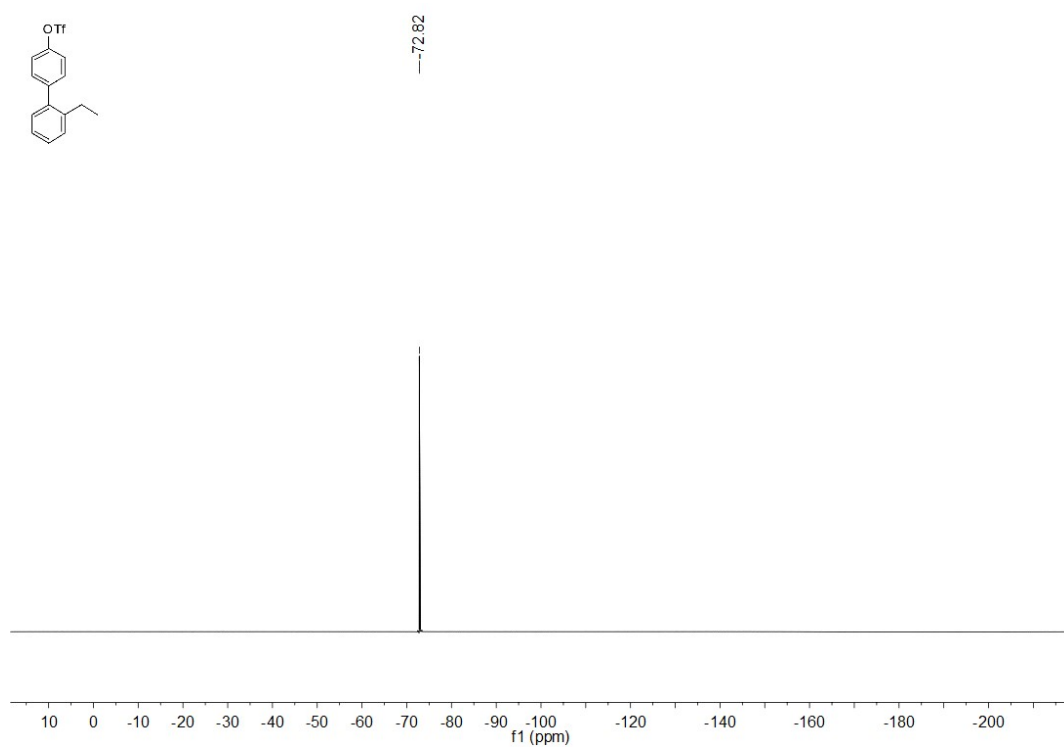

Figure S7. The NMR spectra of **3e**

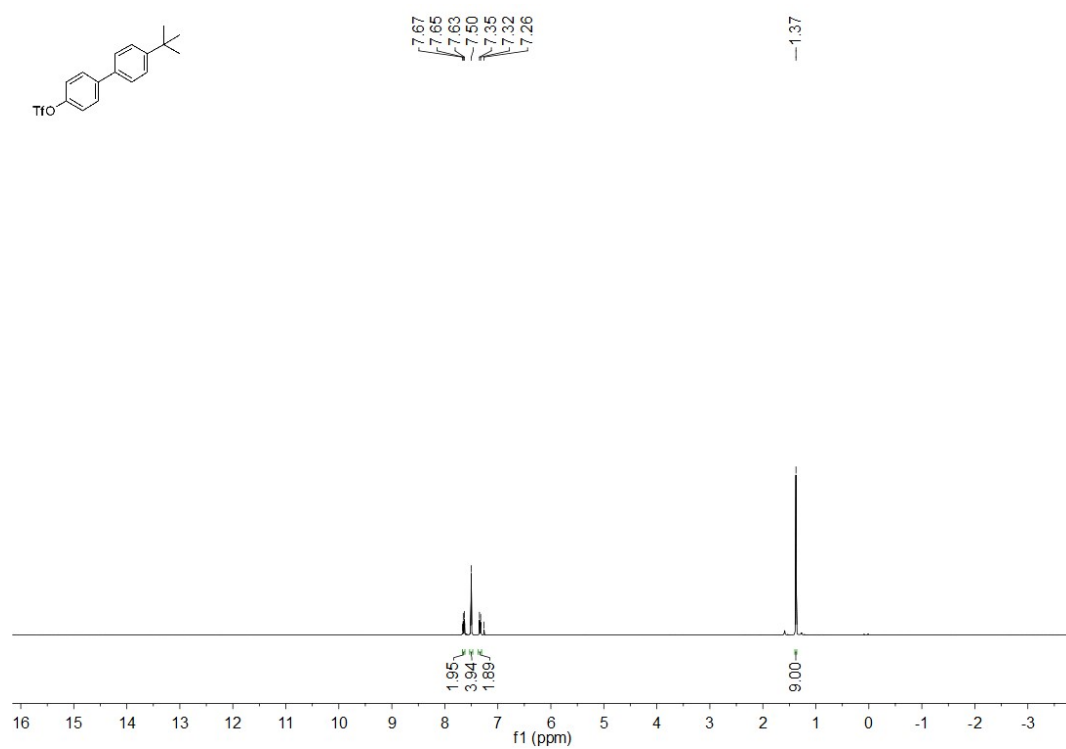

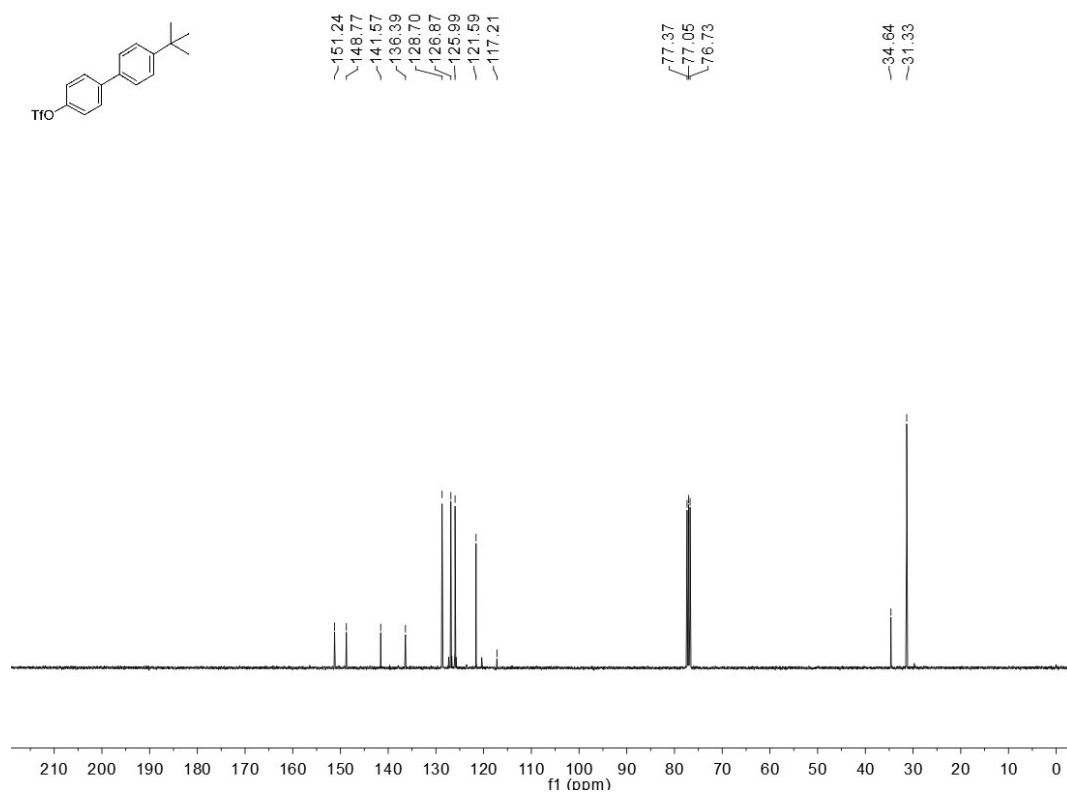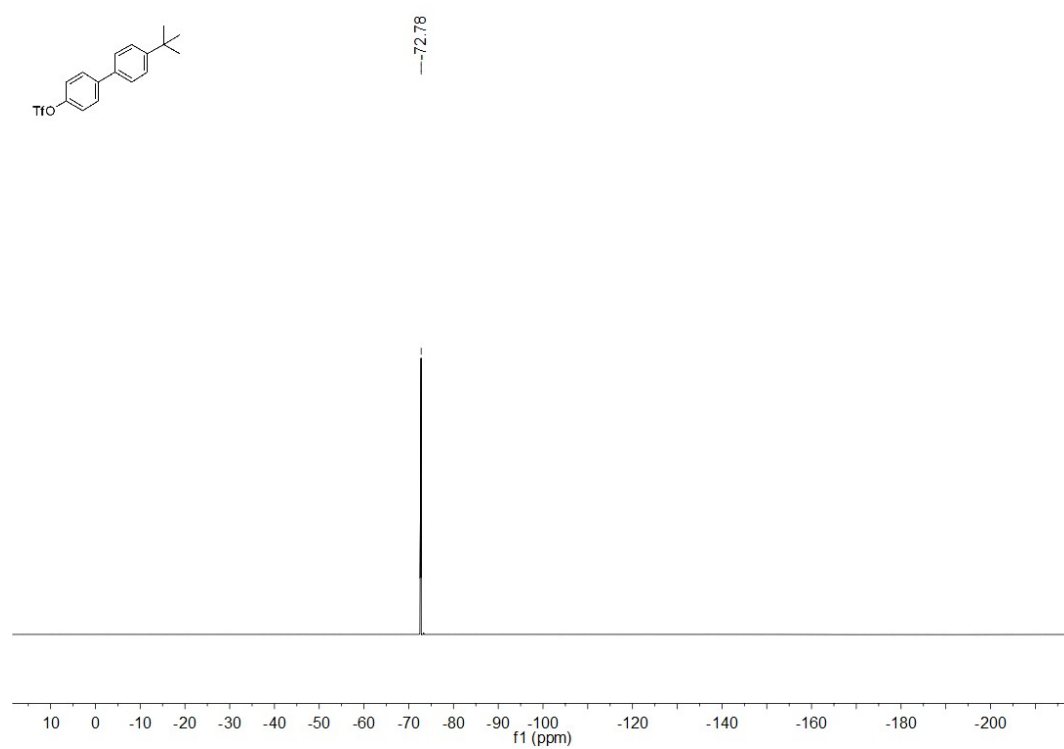

Figure S8. The NMR spectra of **3f**

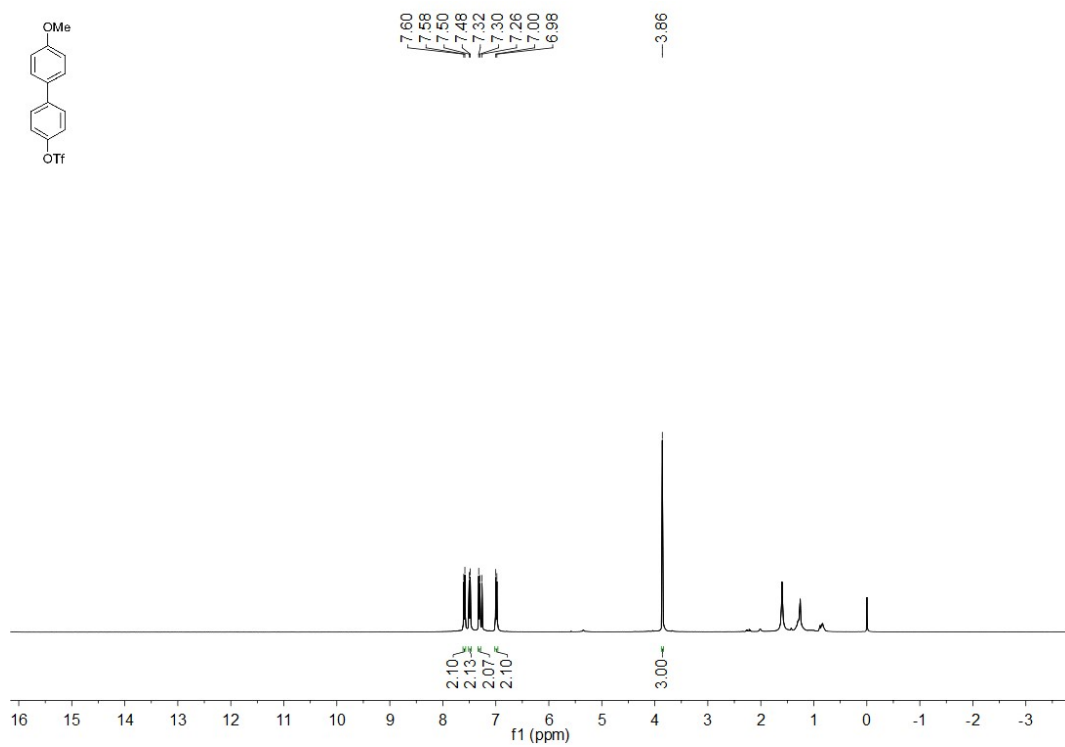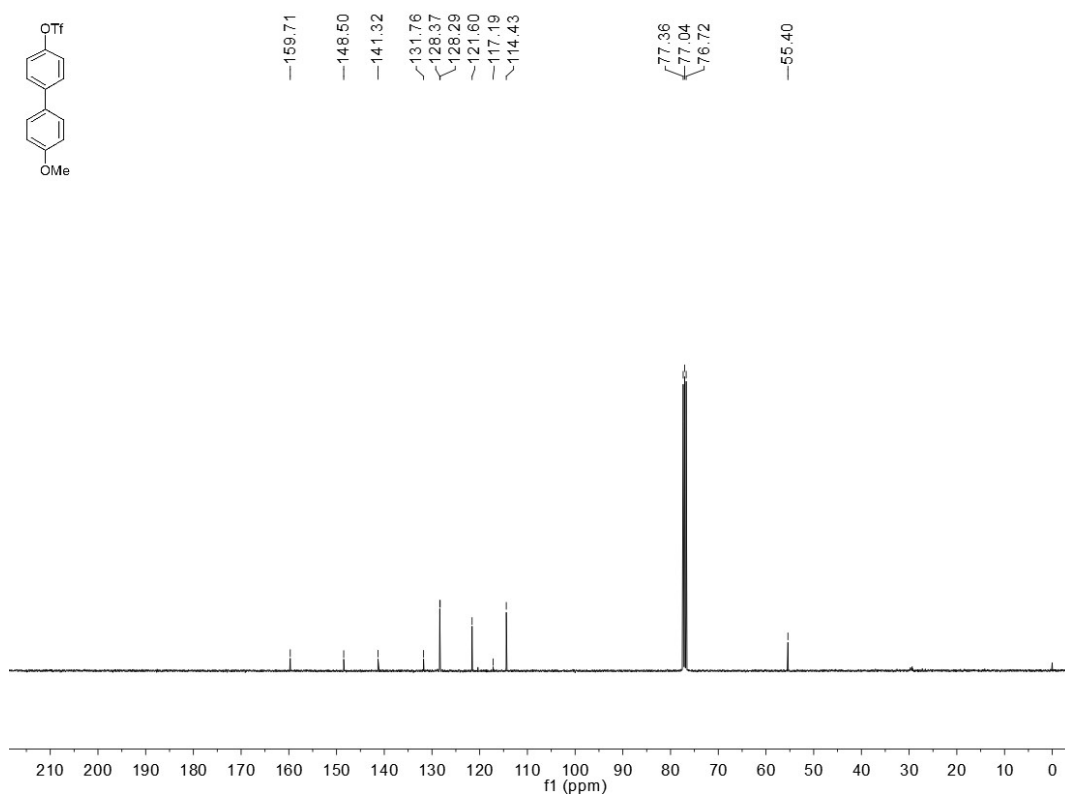

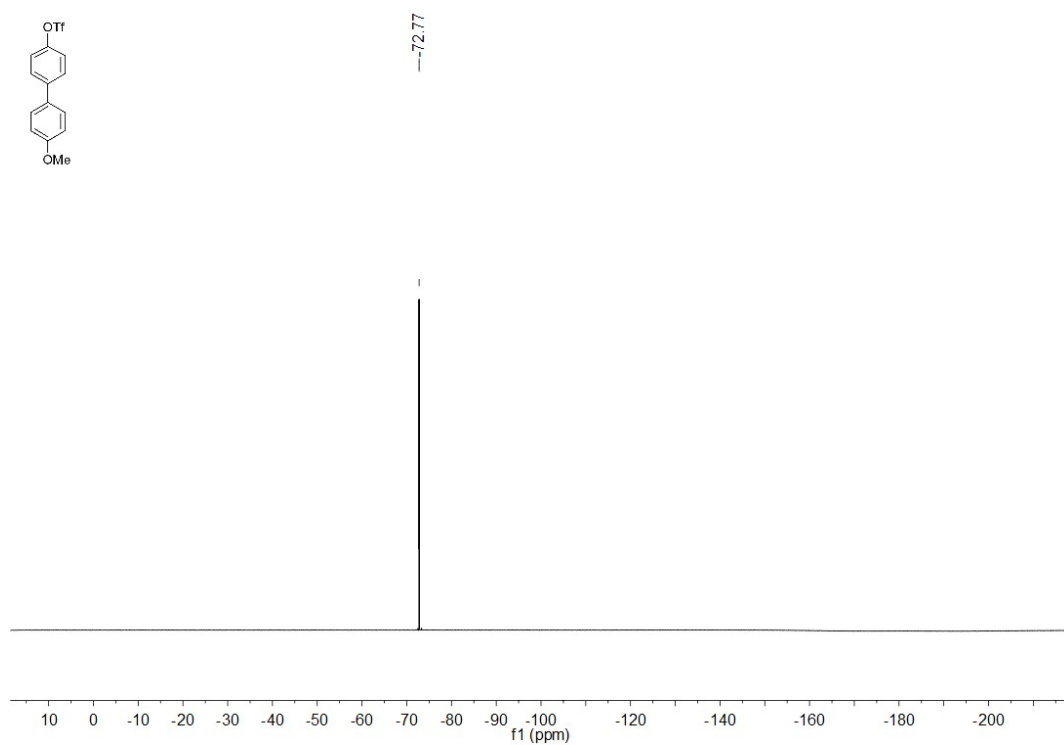

Figure S9. The NMR spectra of **3g**

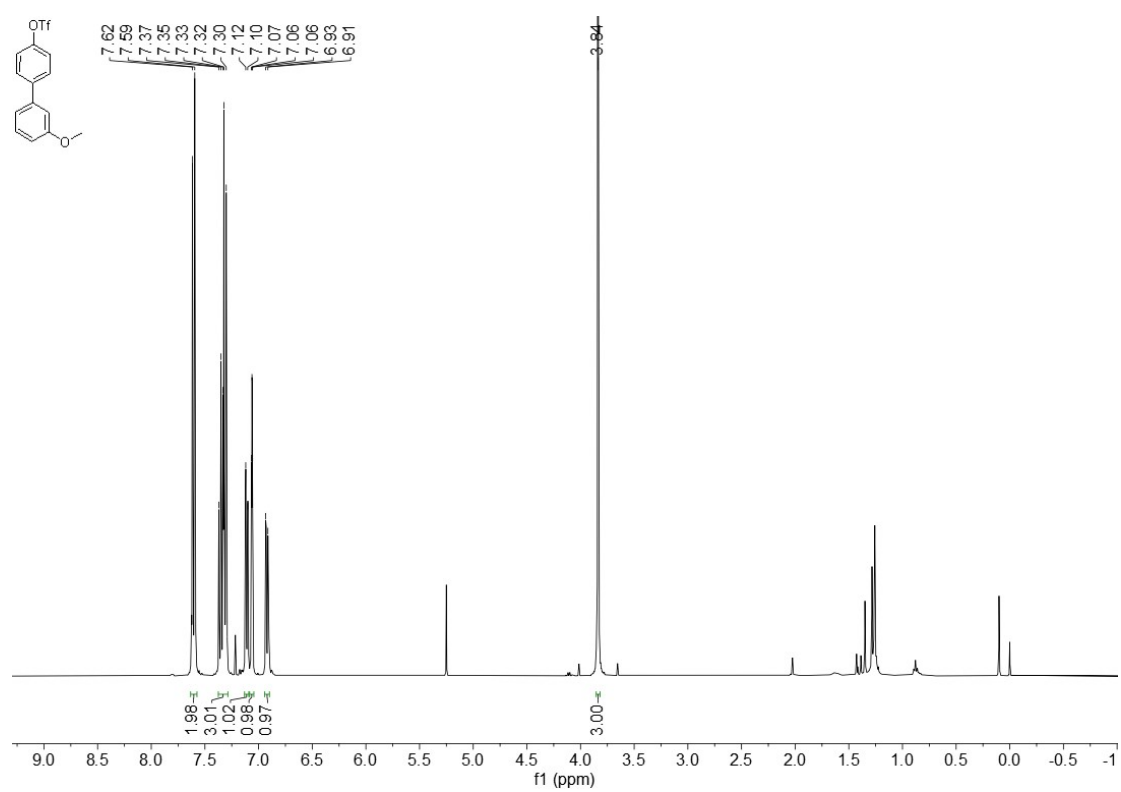



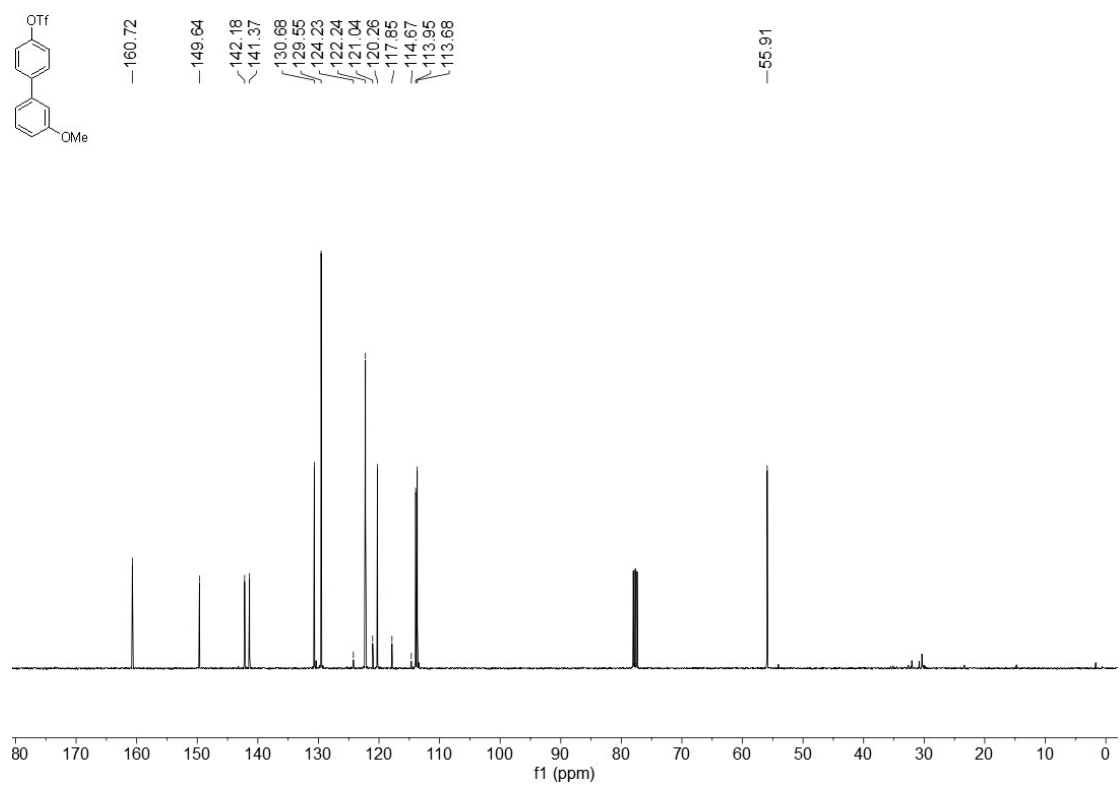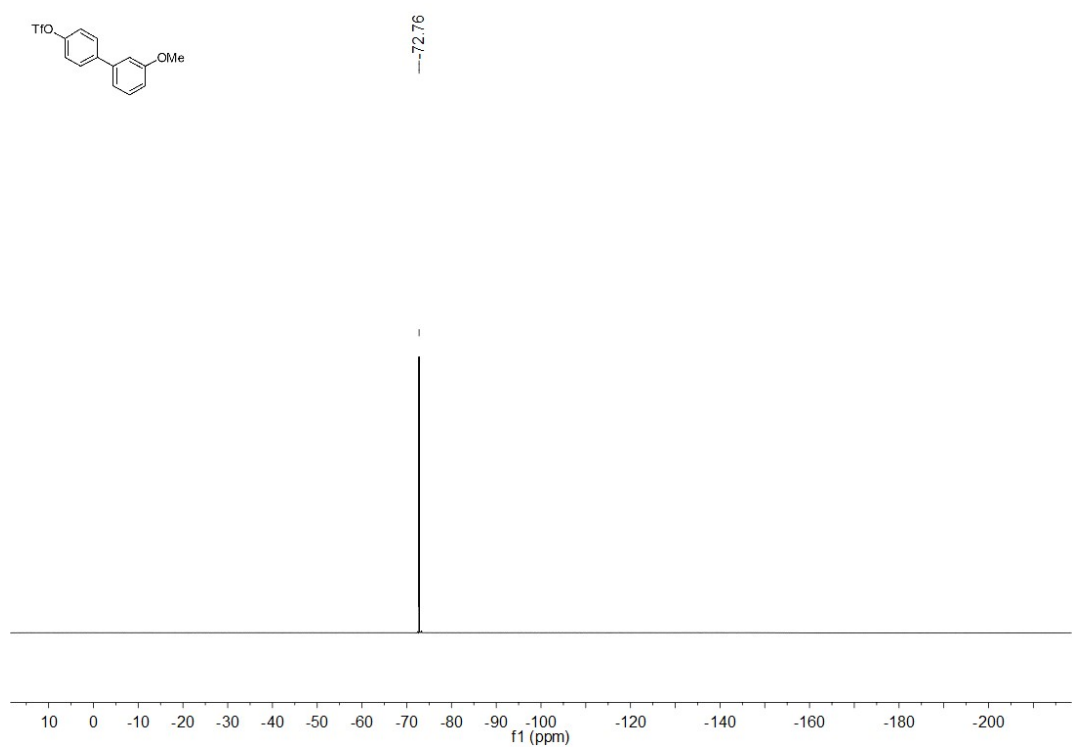

Figure S10. The NMR spectra of **3h**

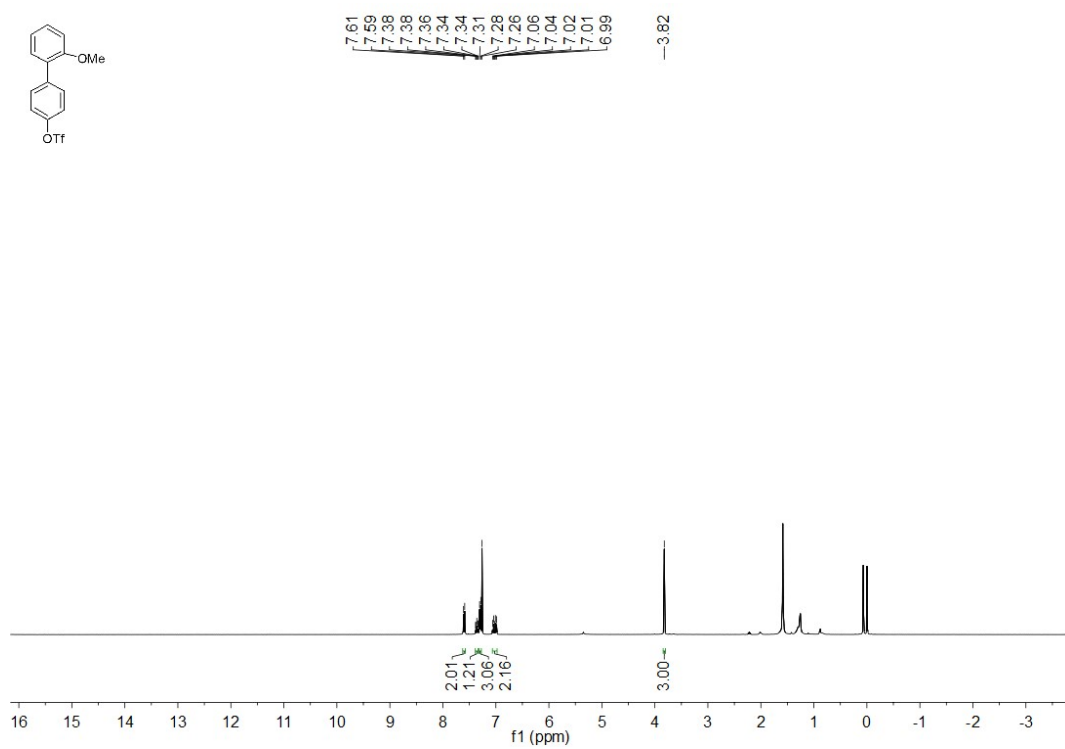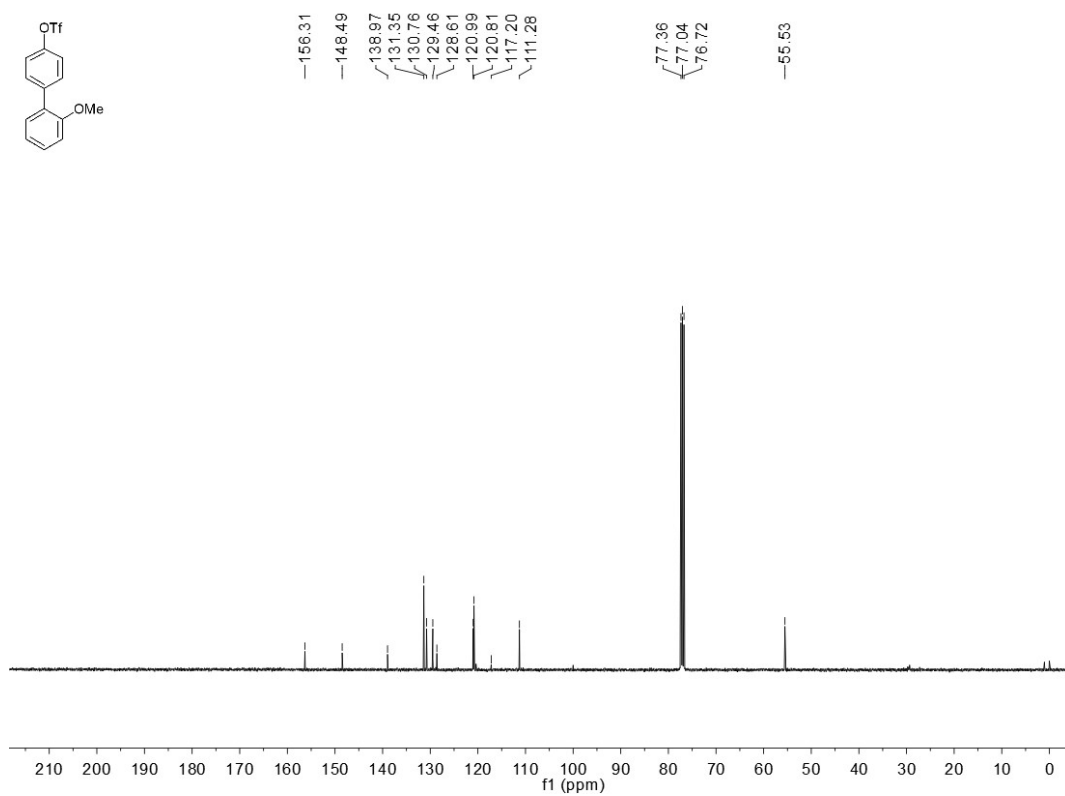

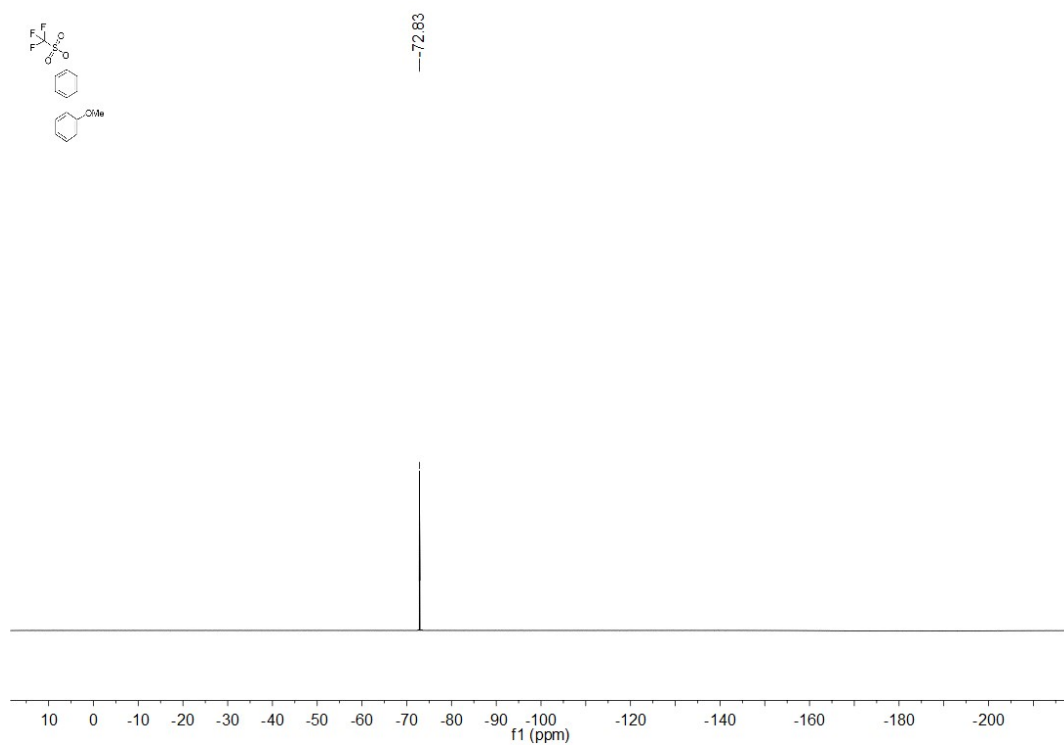

Figure S11. The NMR spectrums of **3i**

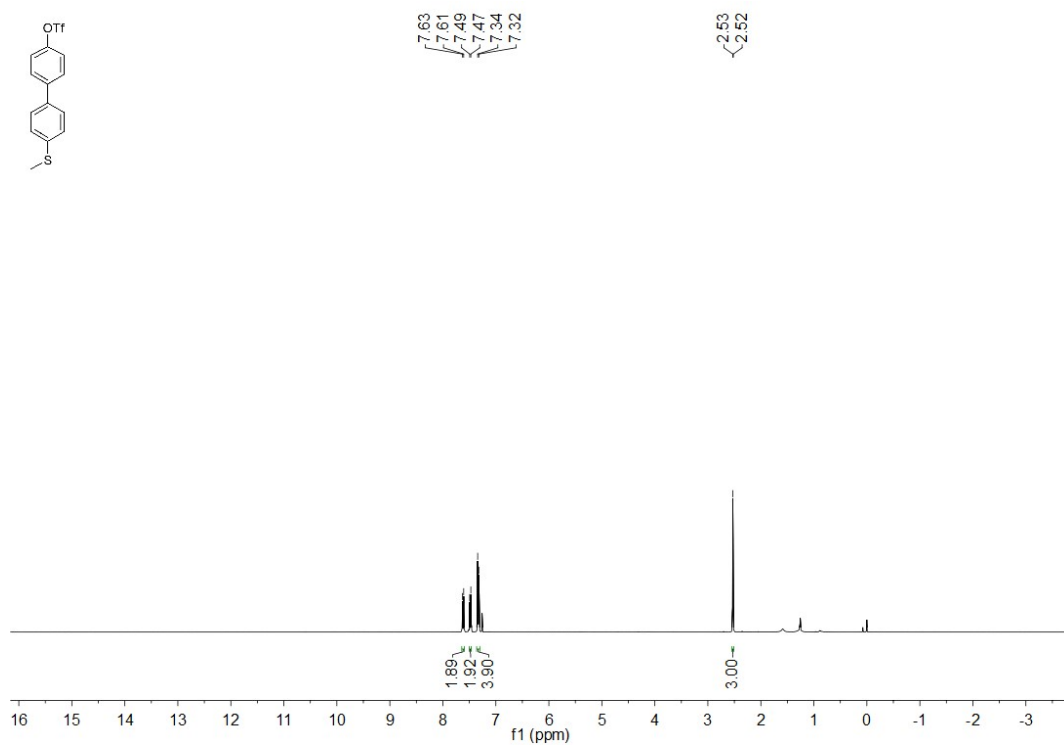

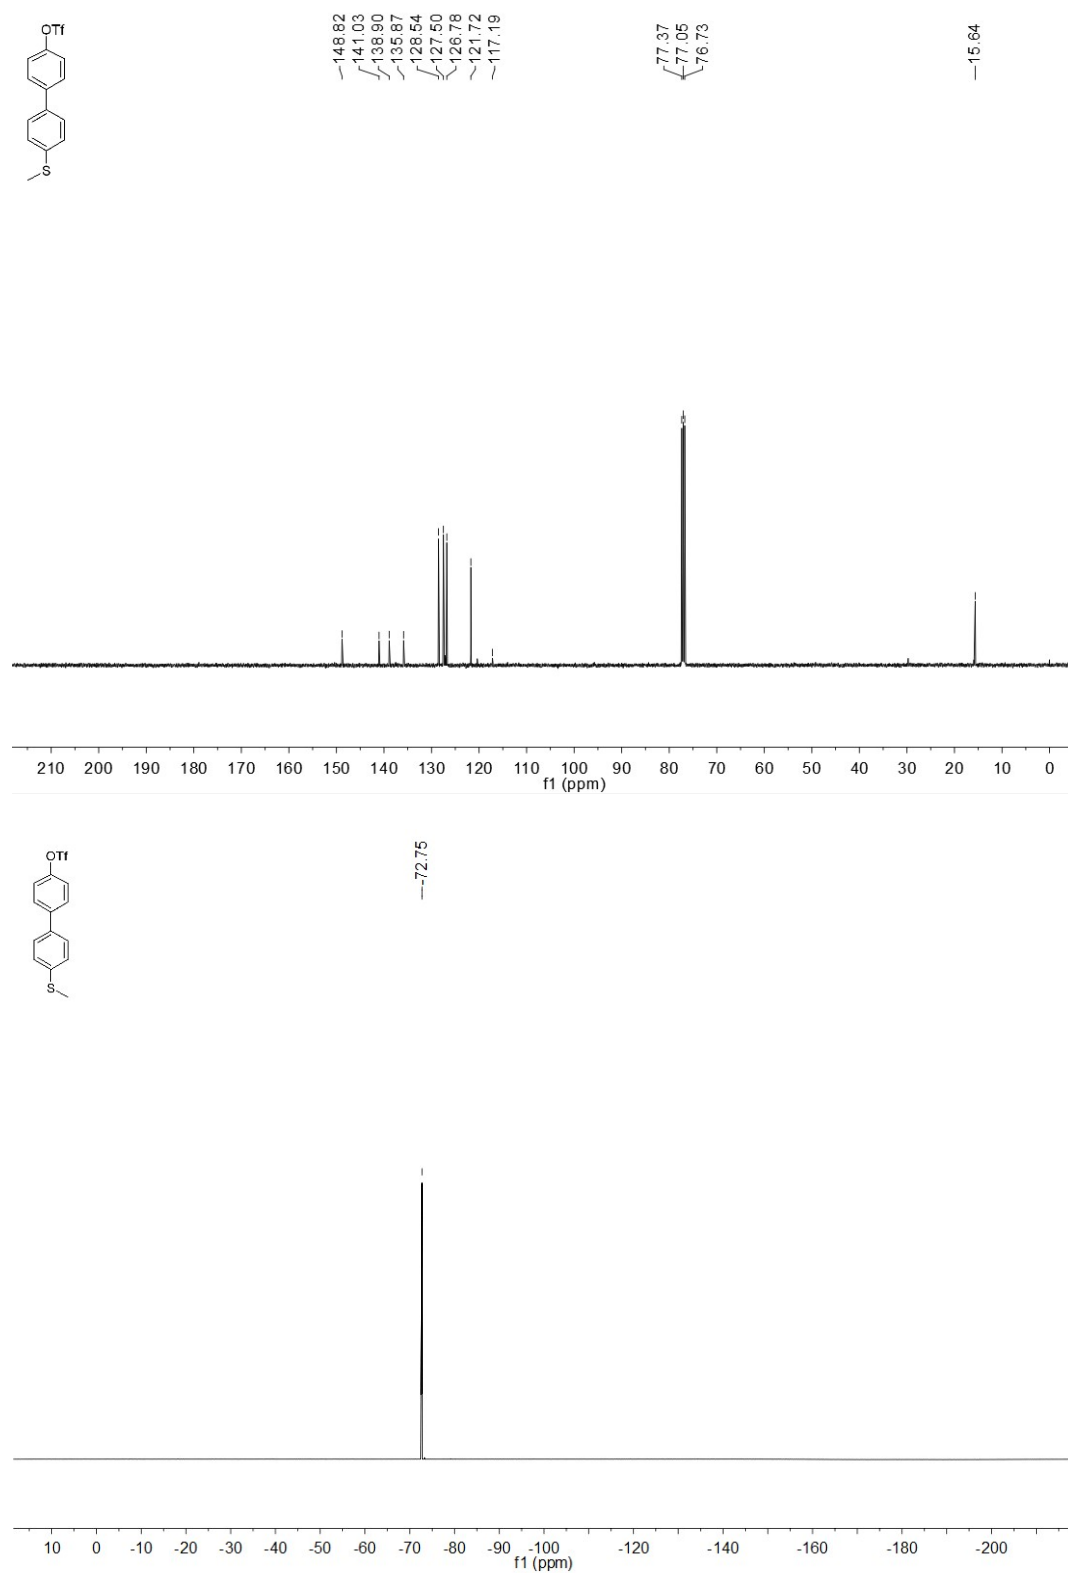

Figure S12. The NMR spectra of **3j**

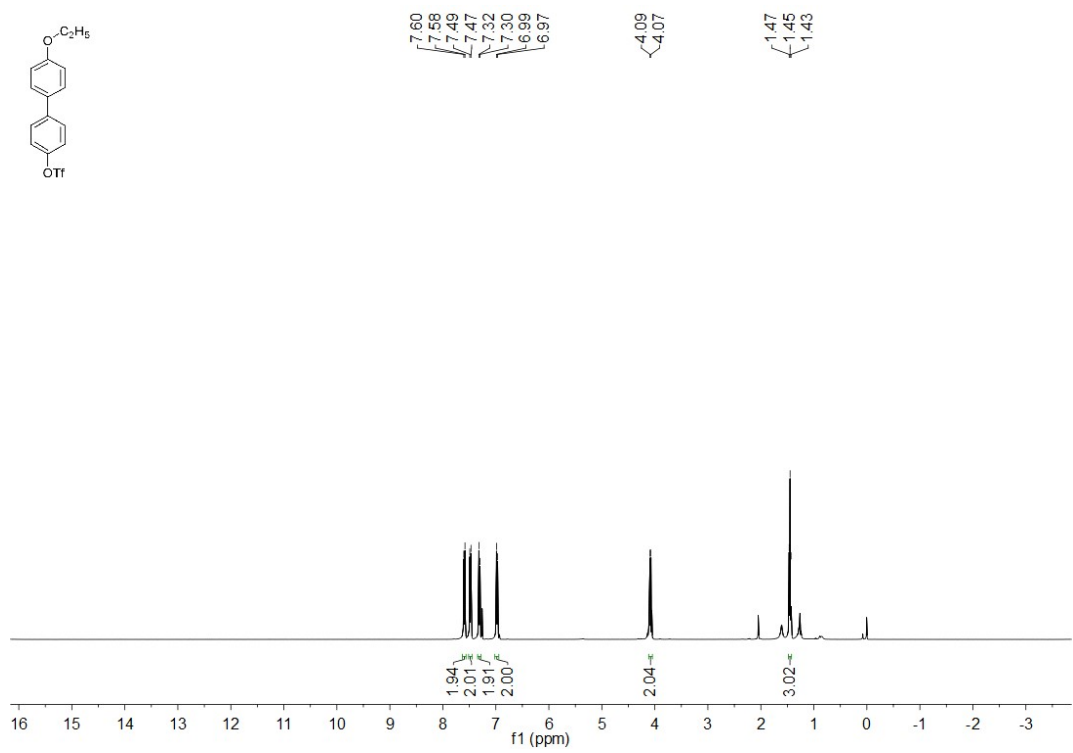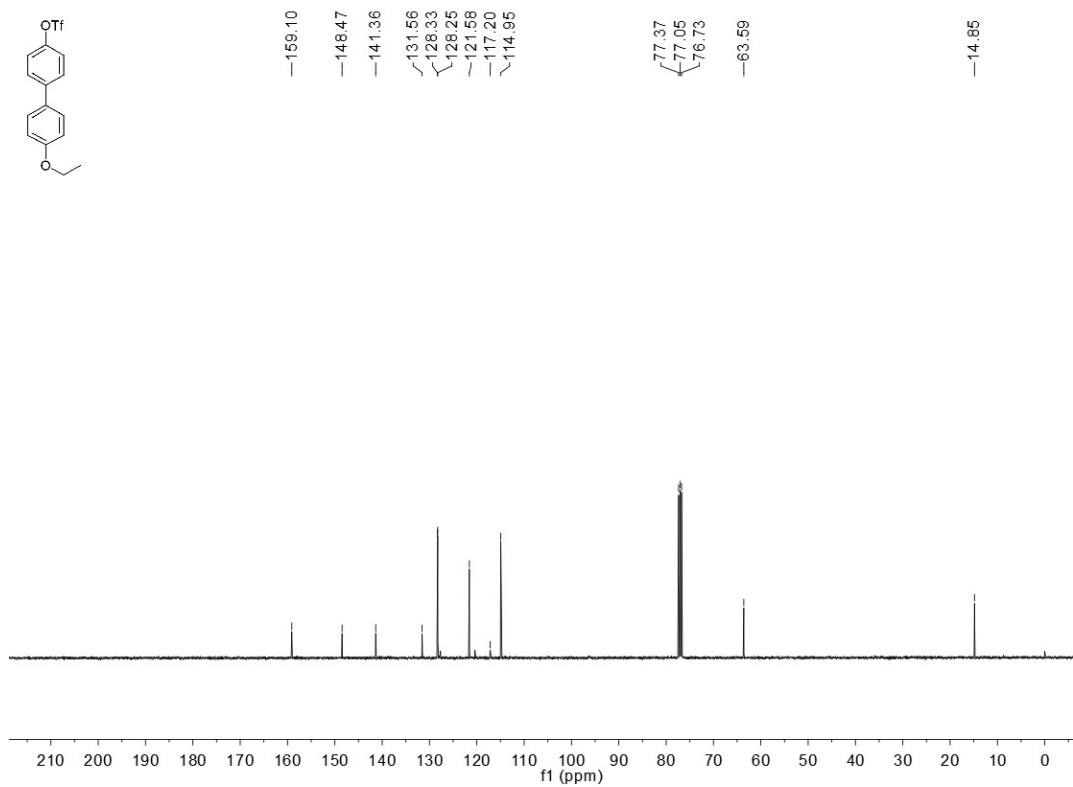

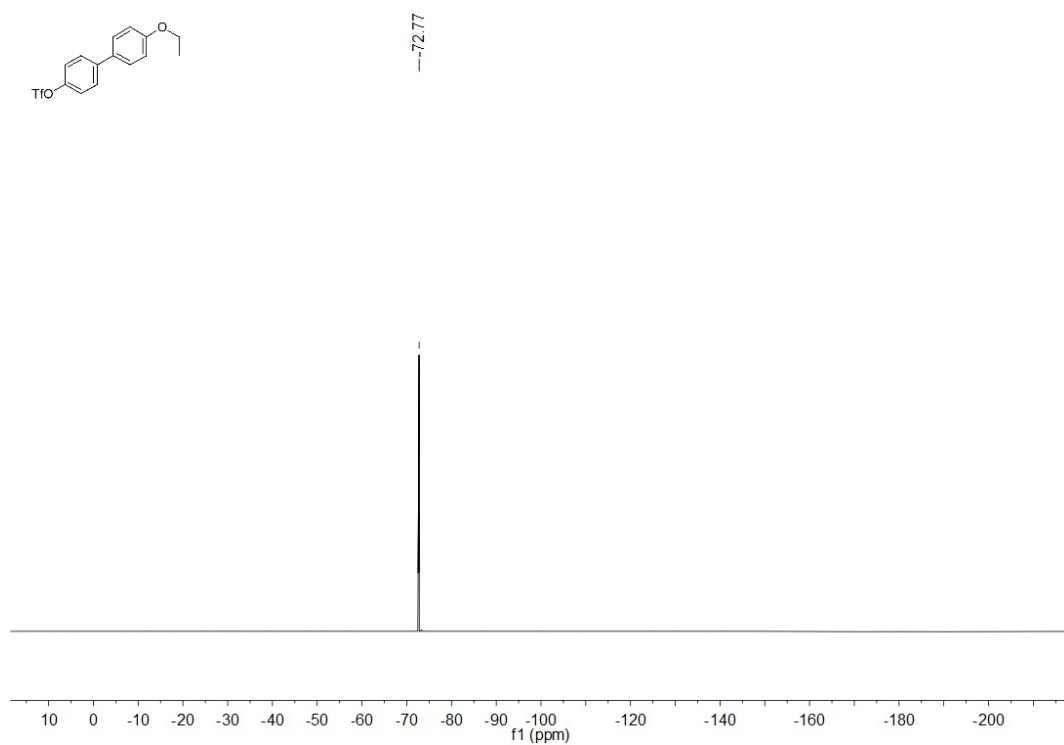

Figure S13. The NMR spectrums of **3k**

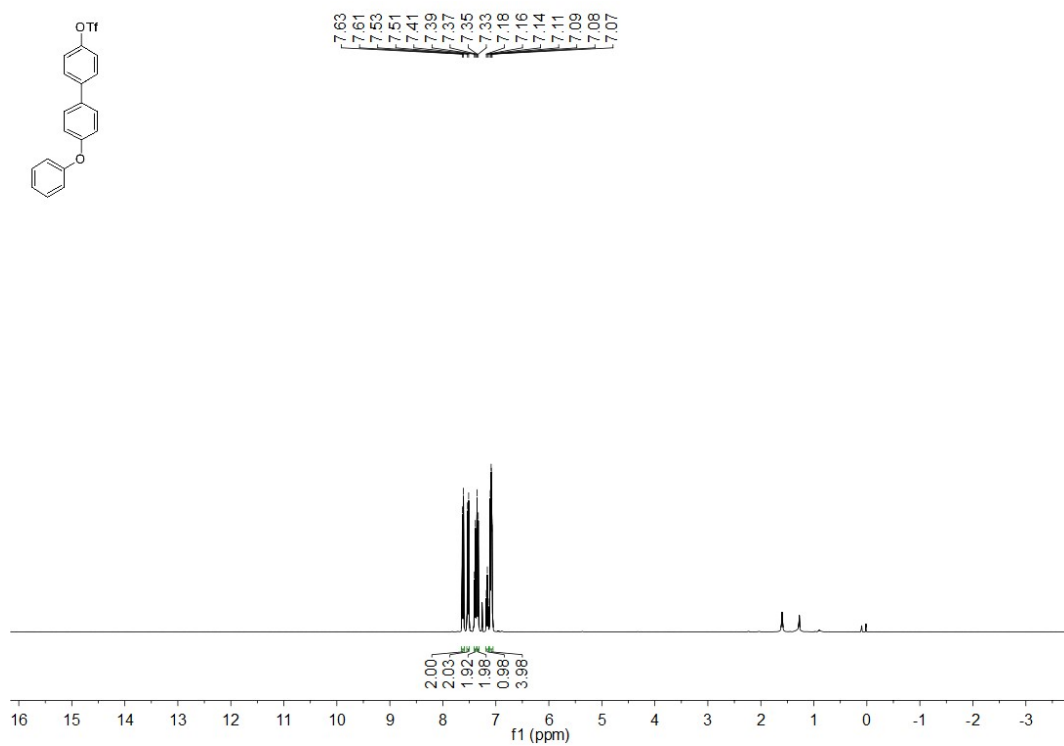

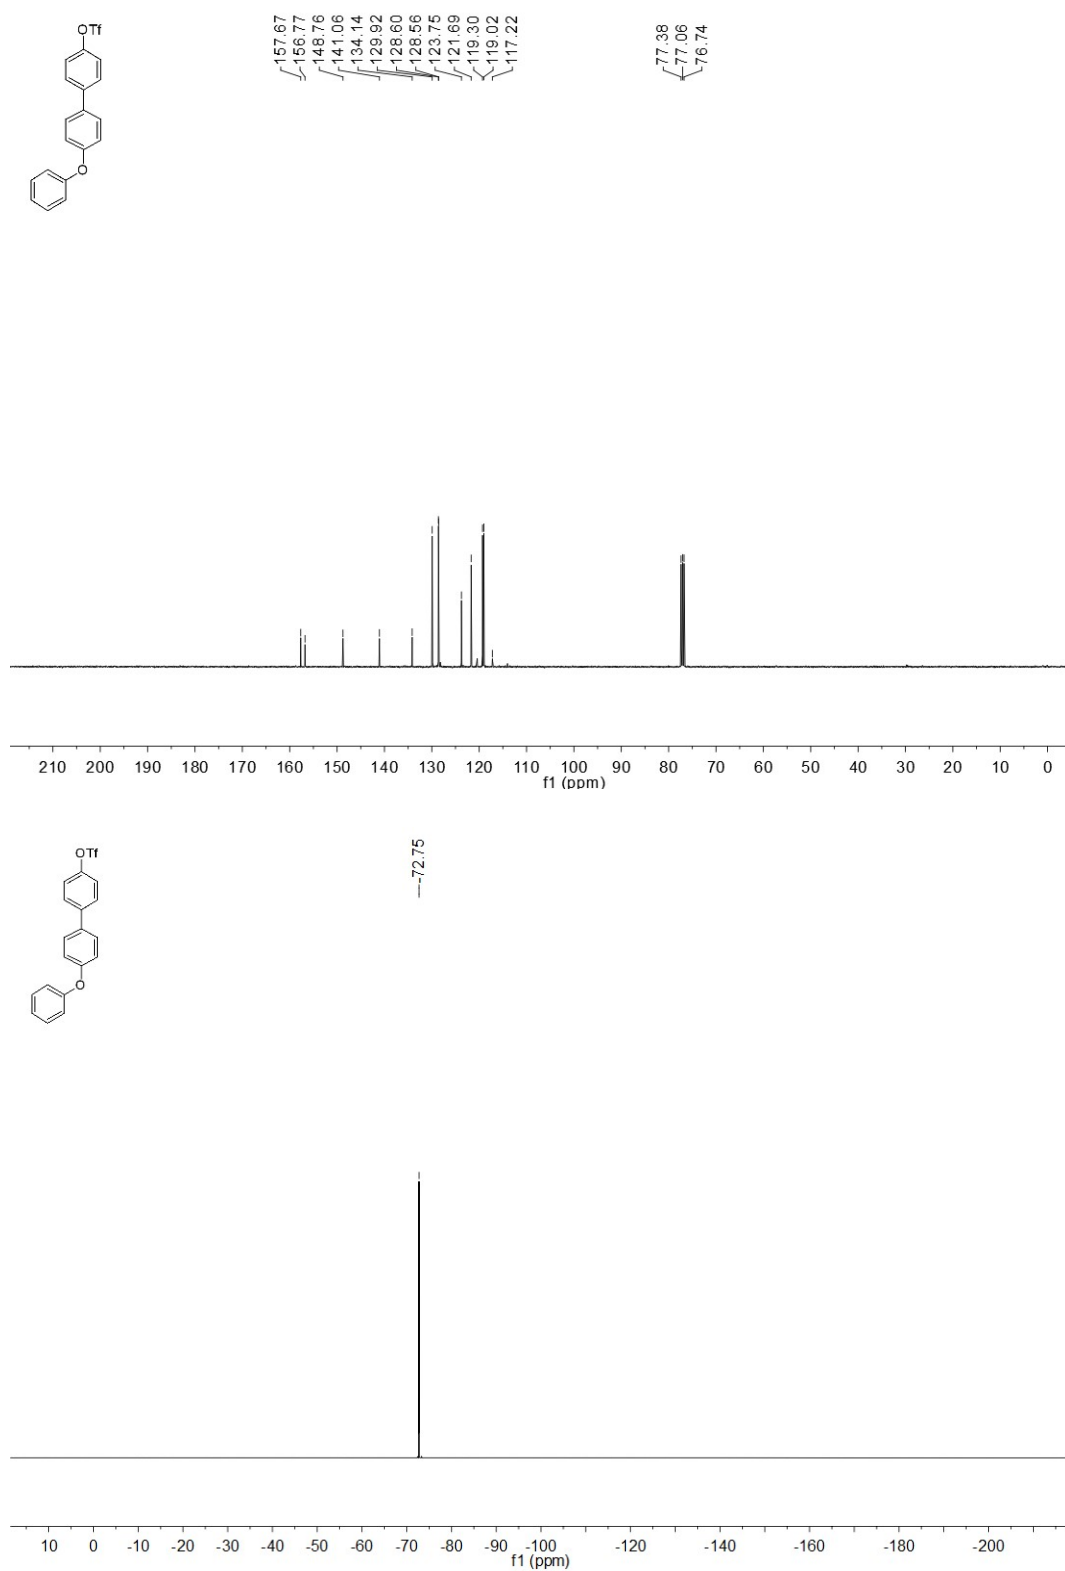

Figure S14. The NMR spectra of **31**

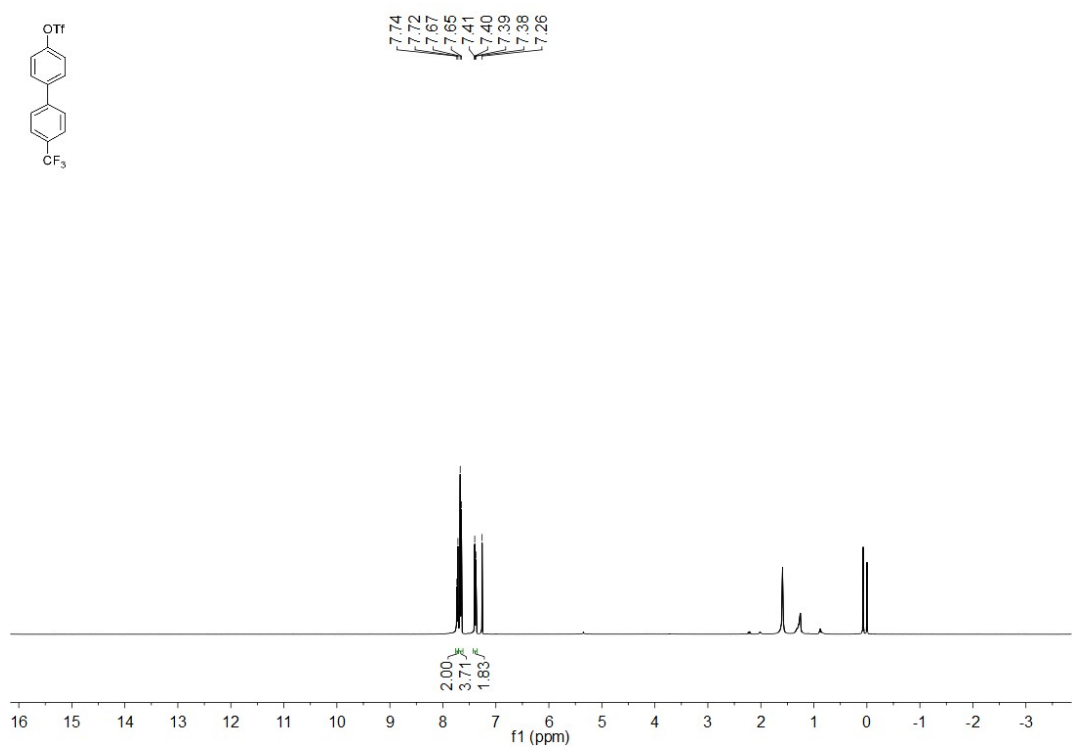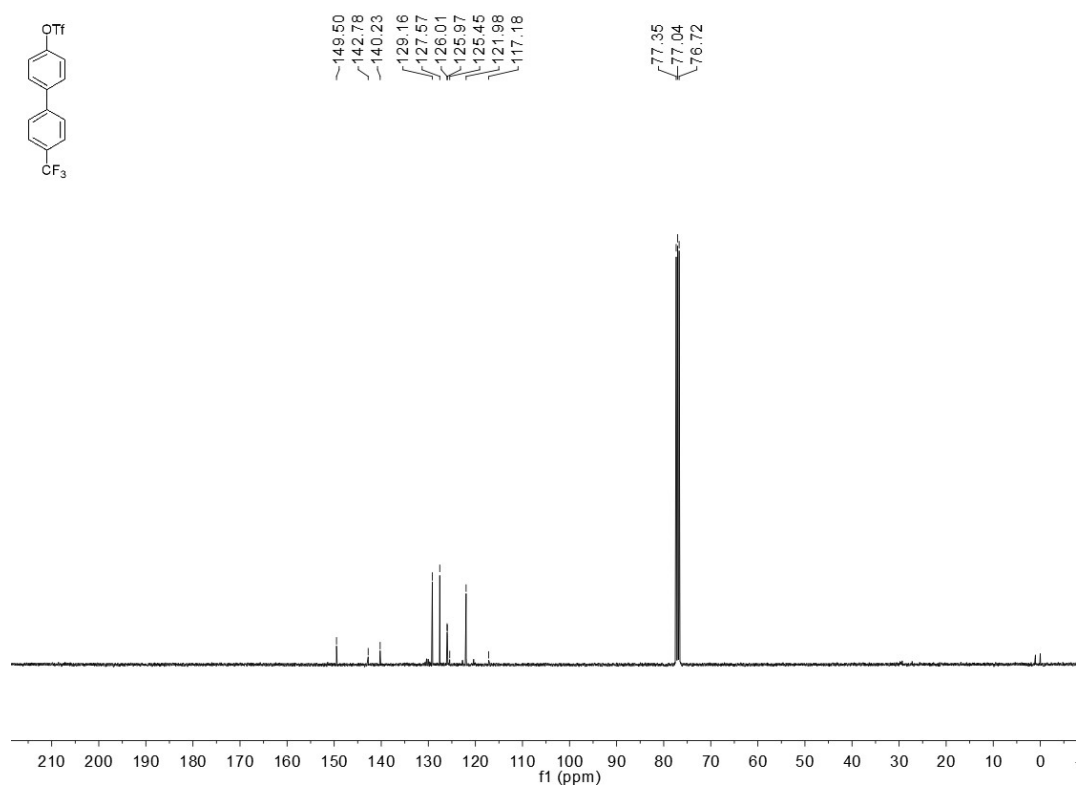



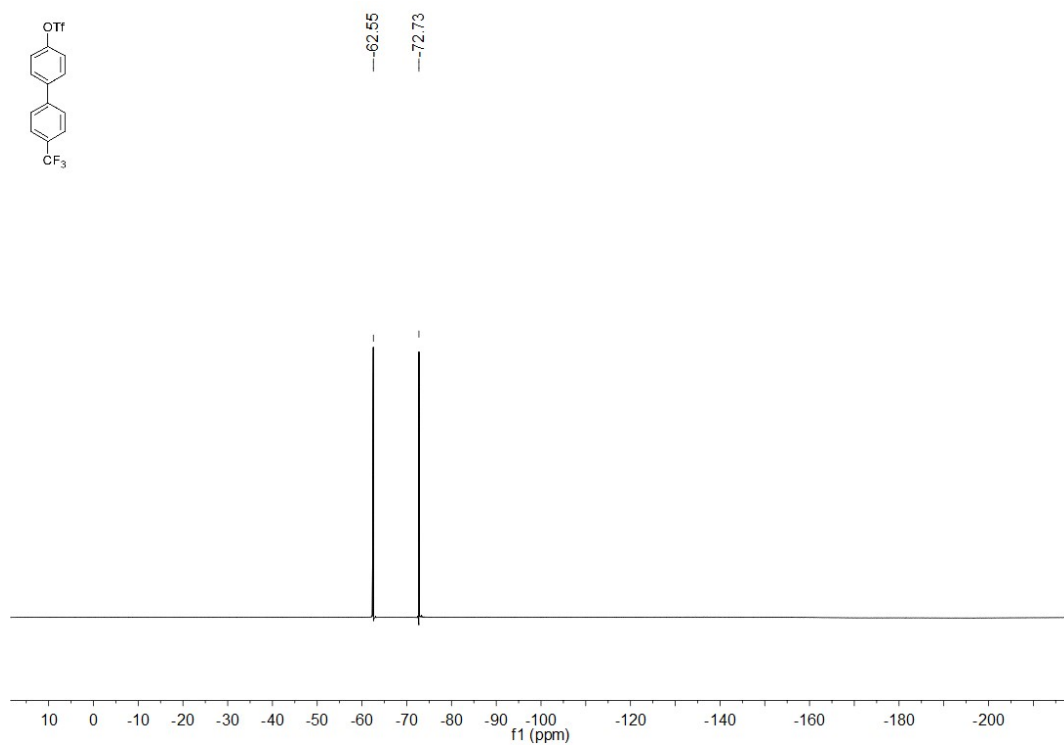

Figure S15. The NMR spectra of **3m**

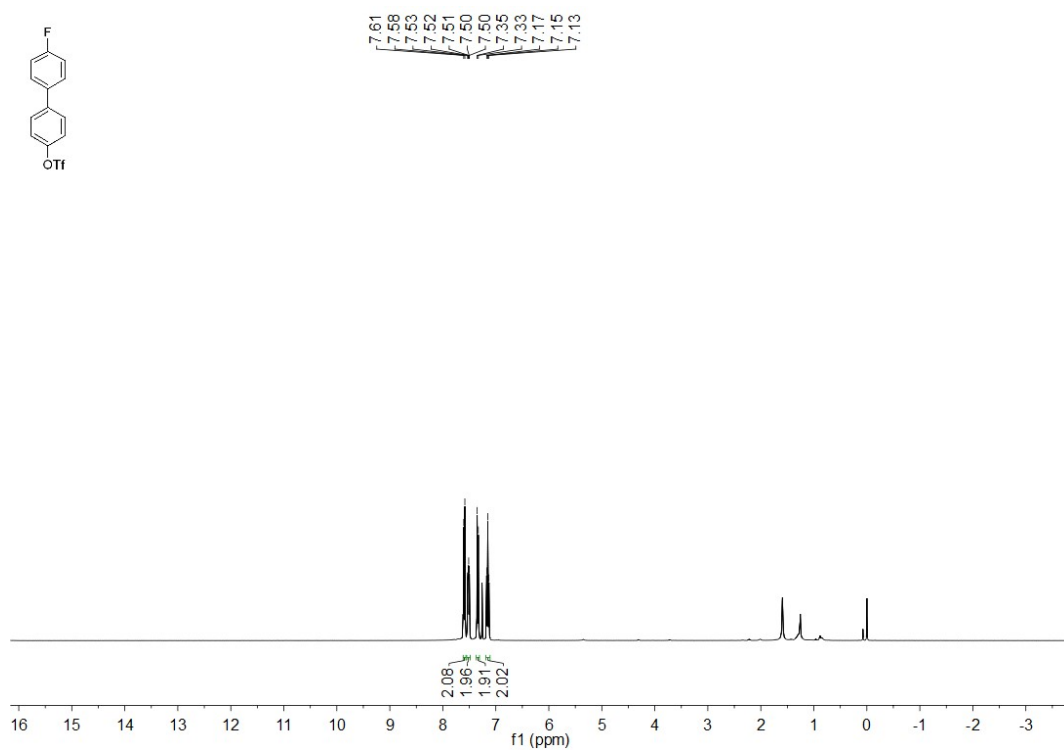

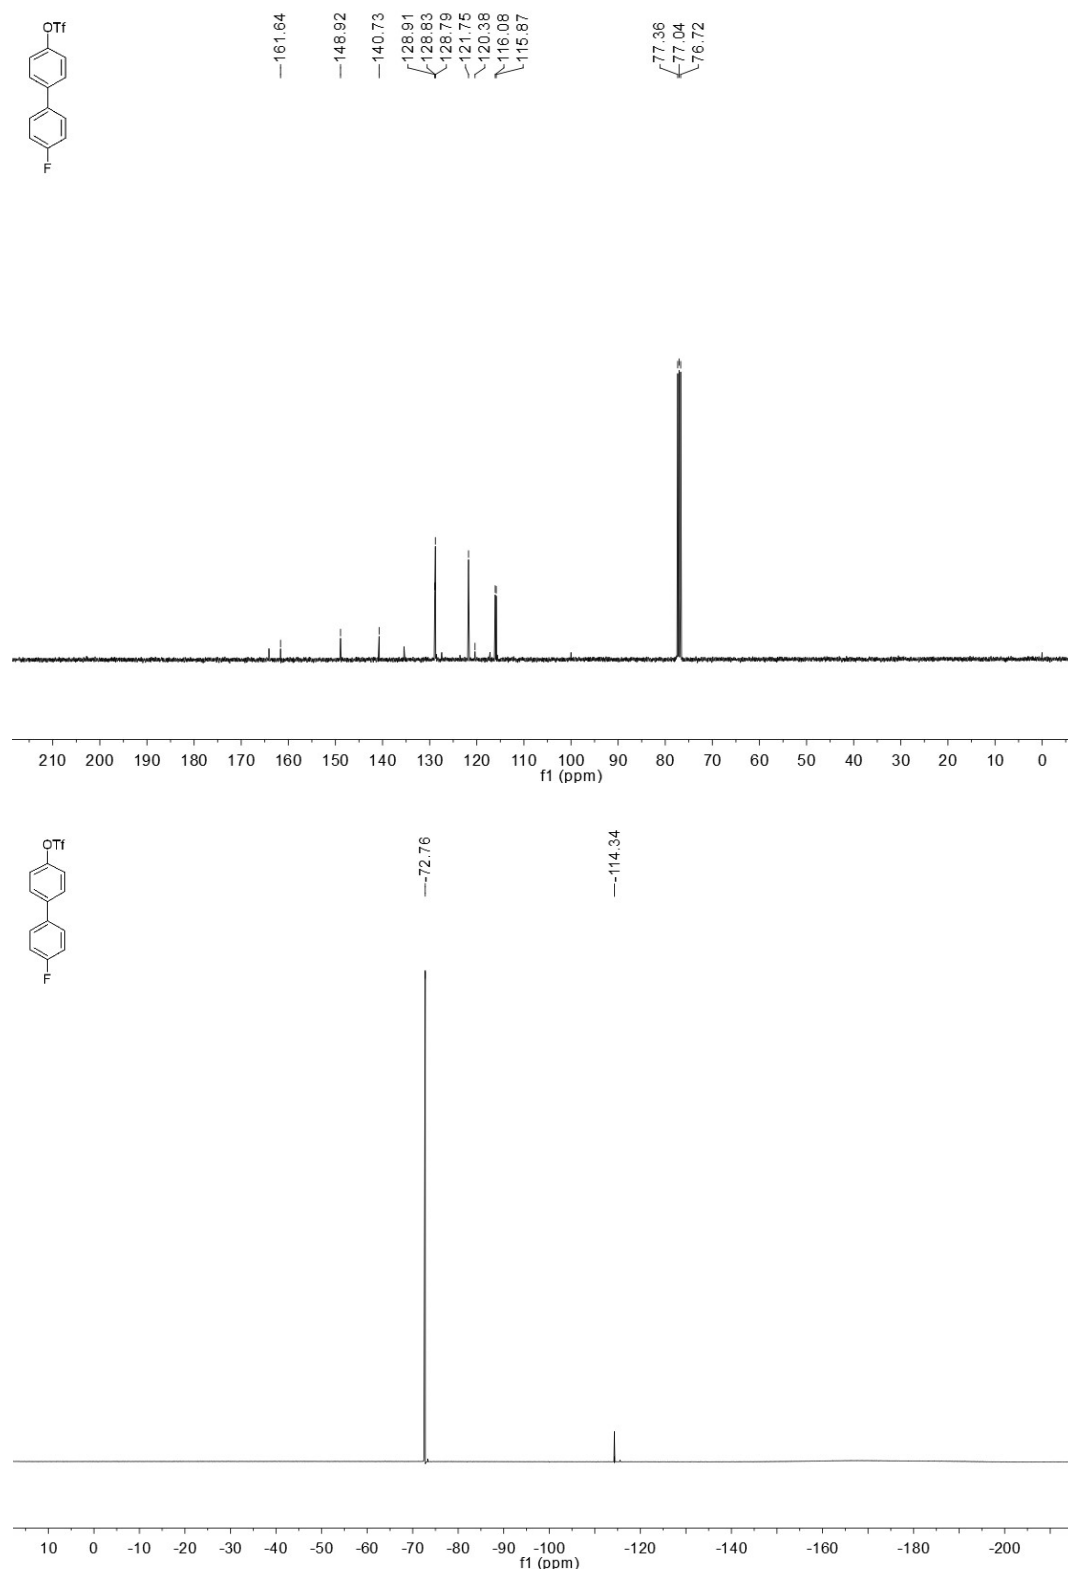

Figure S16. The NMR spectra of **3n**

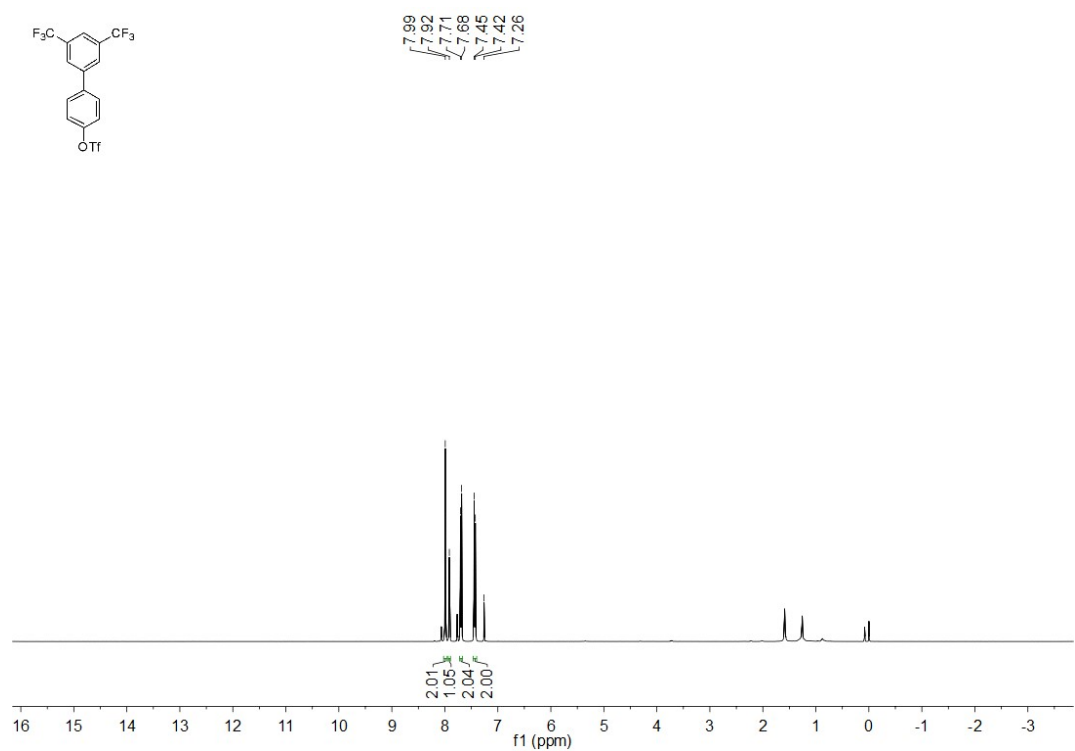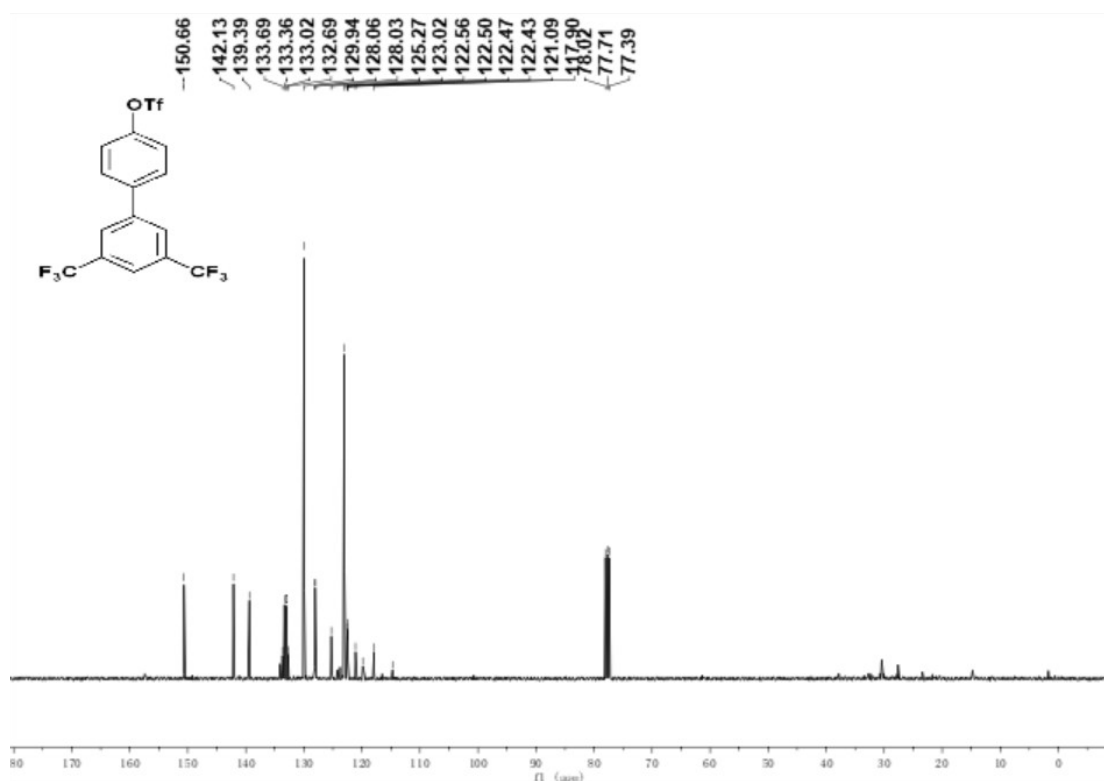

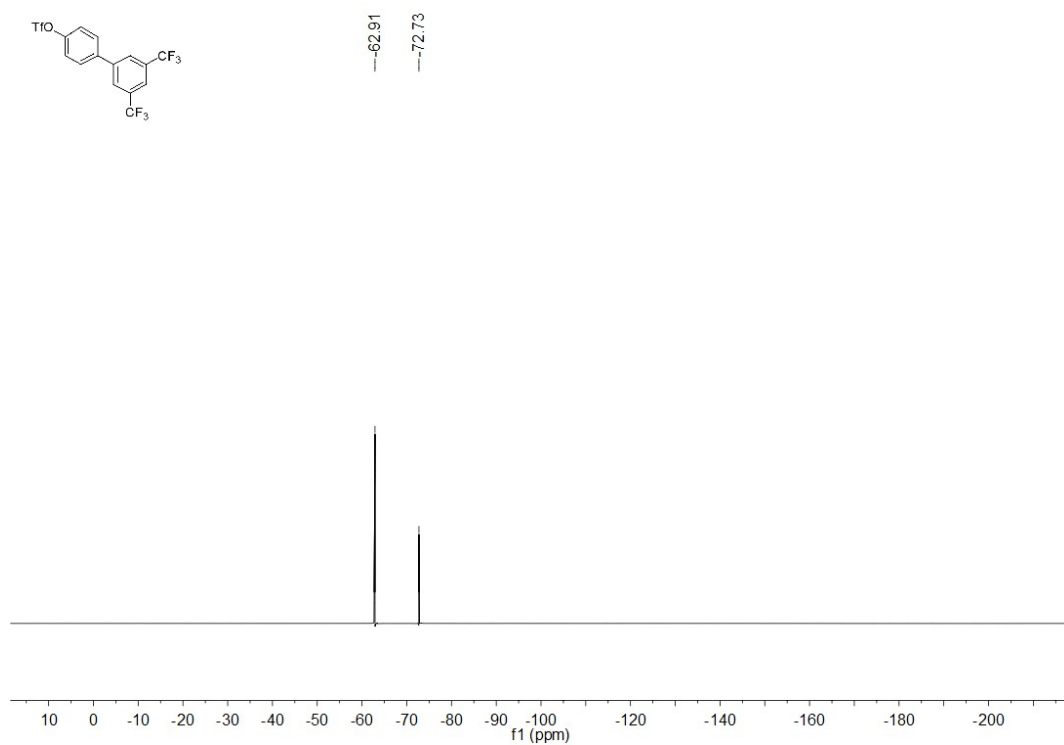

Figure S17. The NMR spectra of **3o**

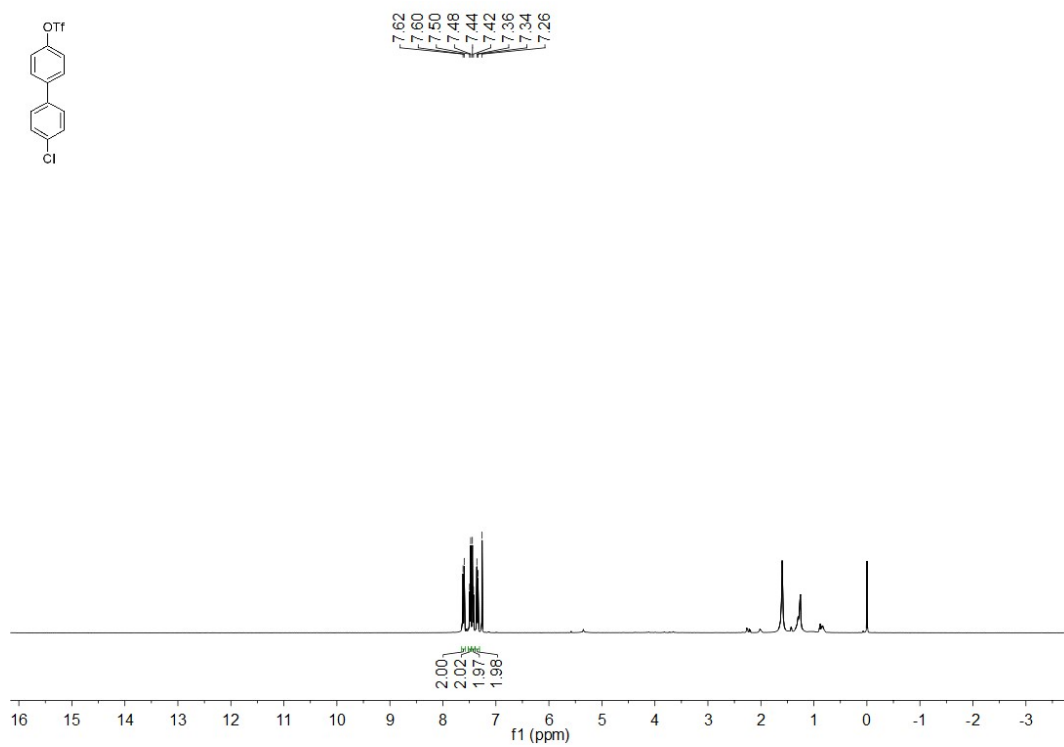

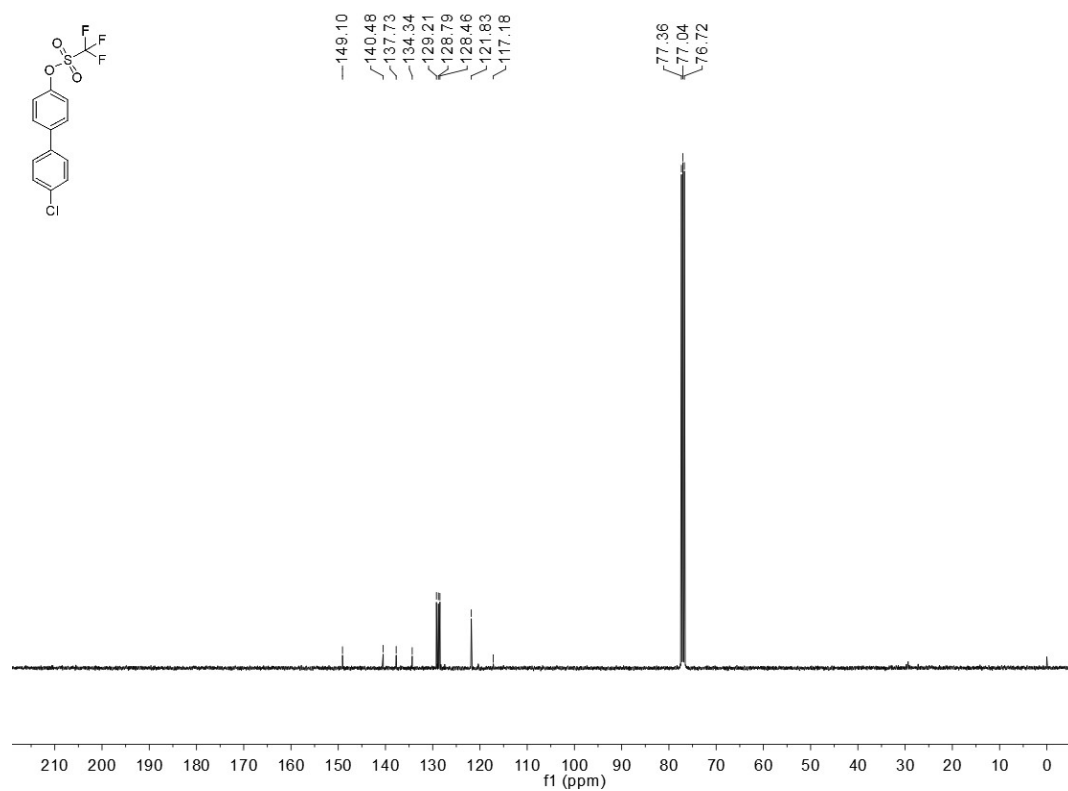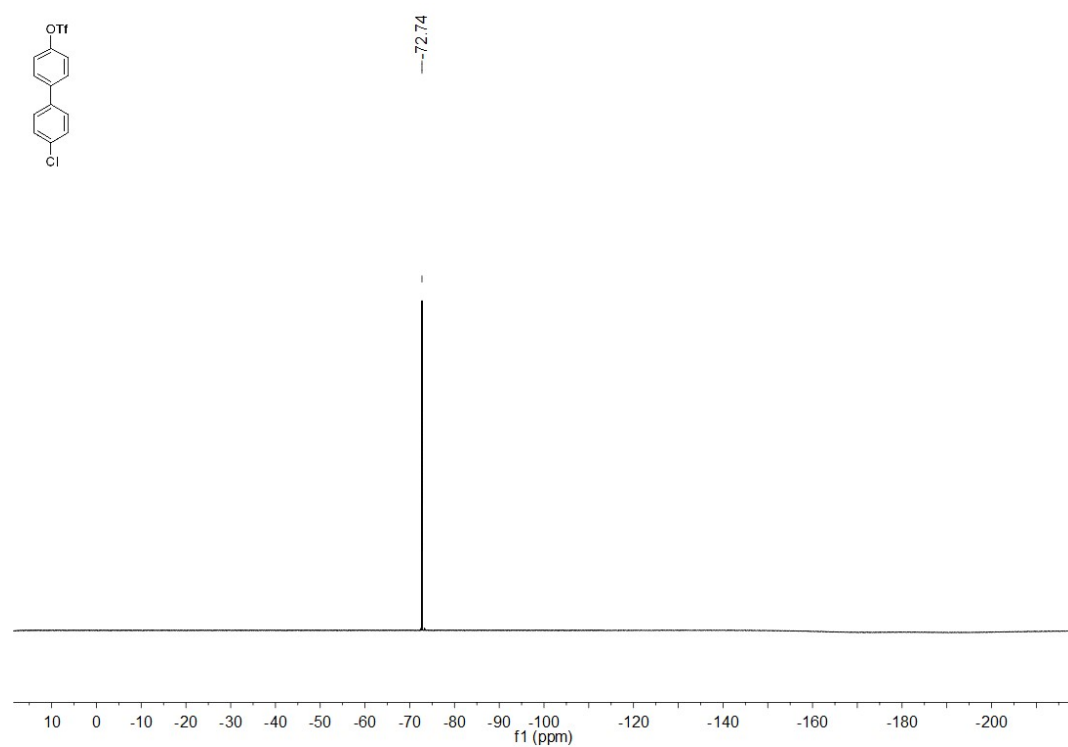

Figure S18. The NMR spectra of **3p**

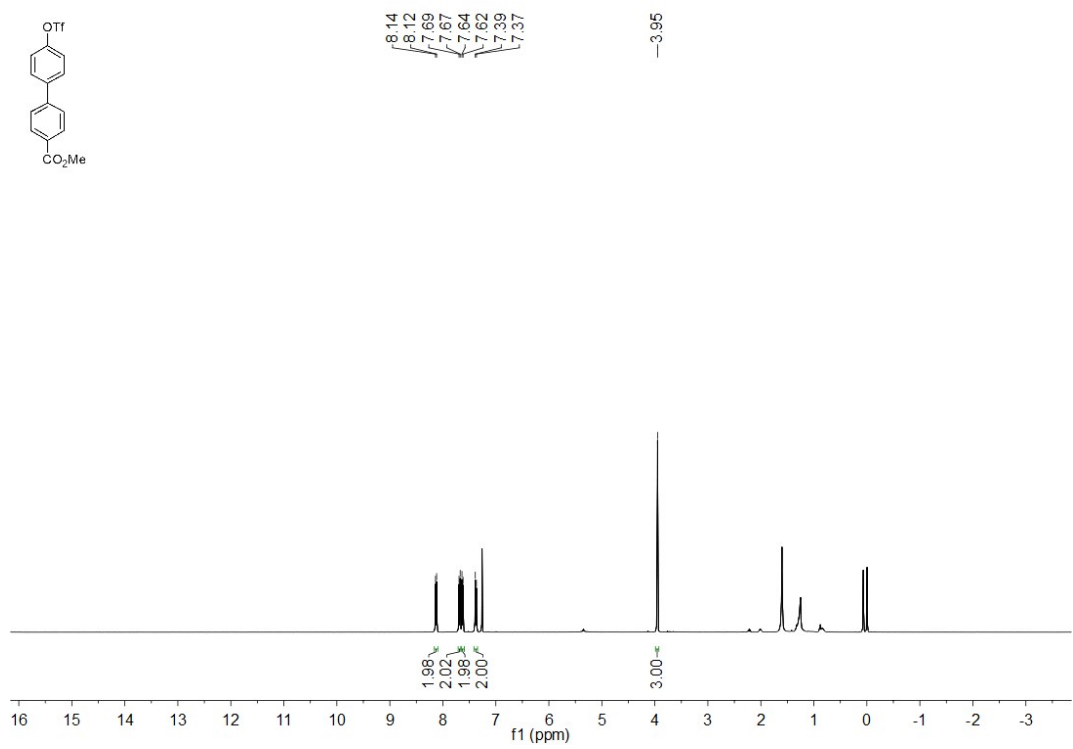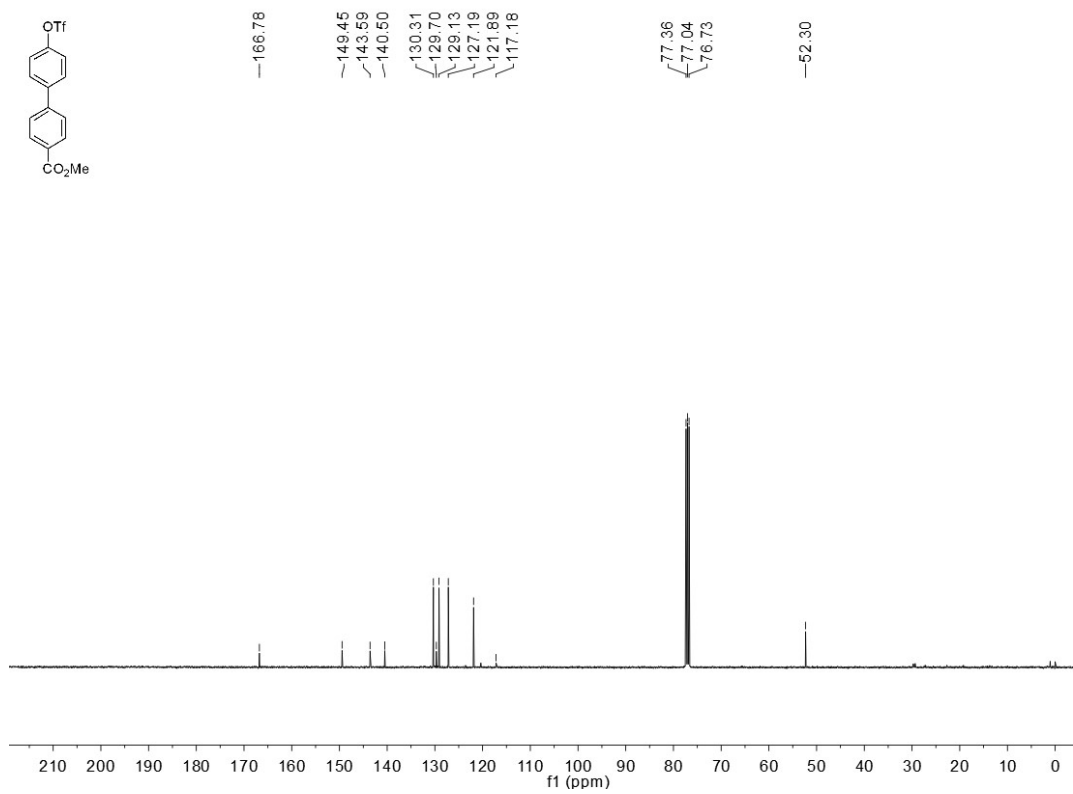

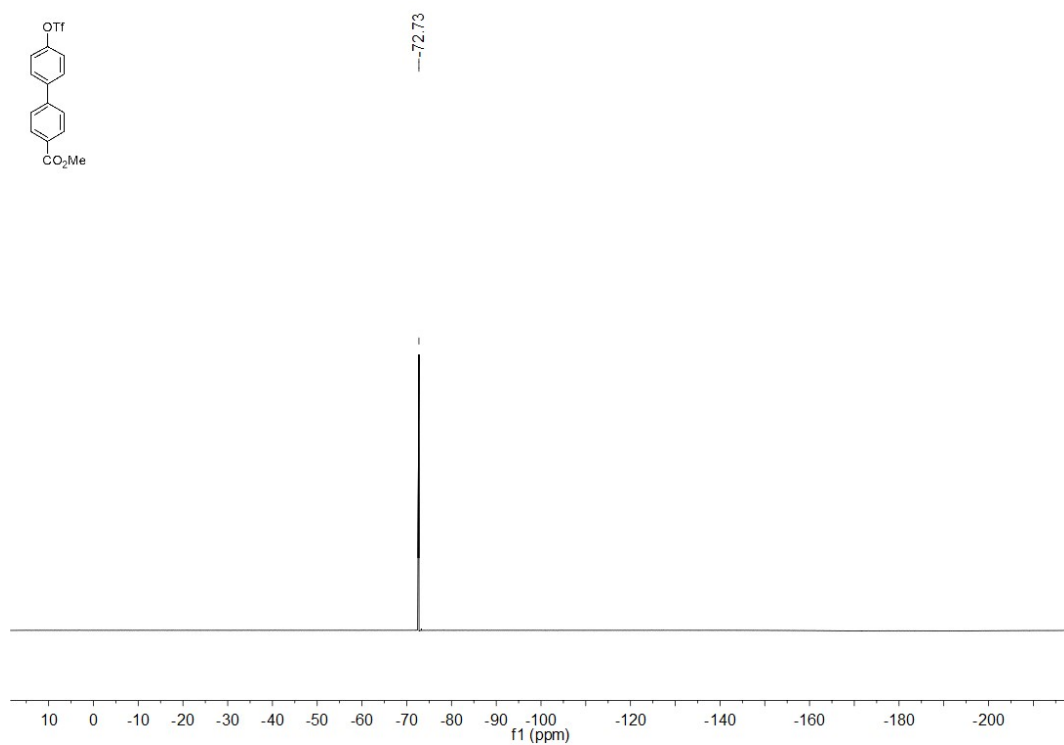

Figure S19. The NMR spectra of **3q**

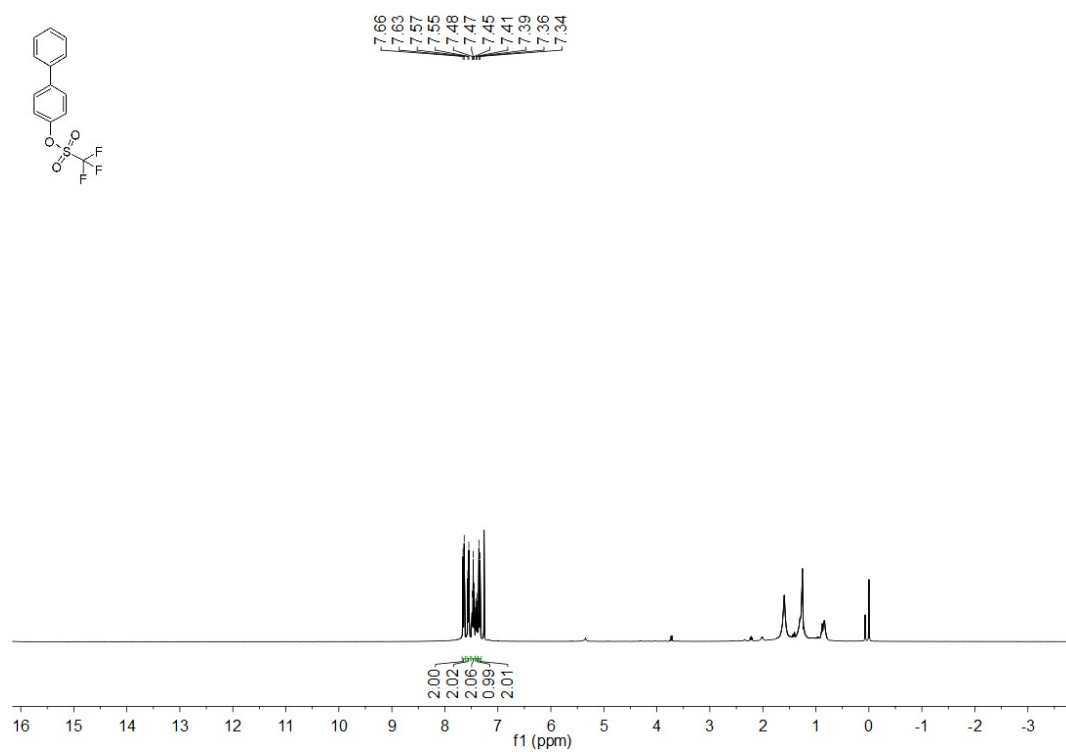

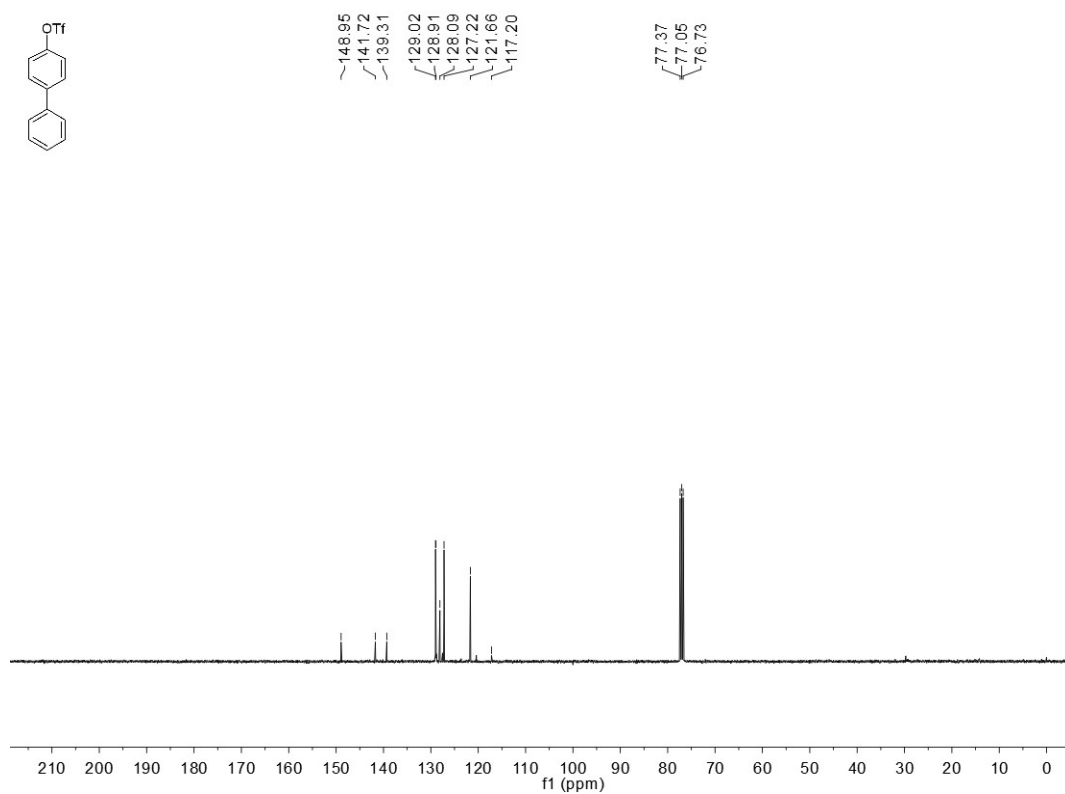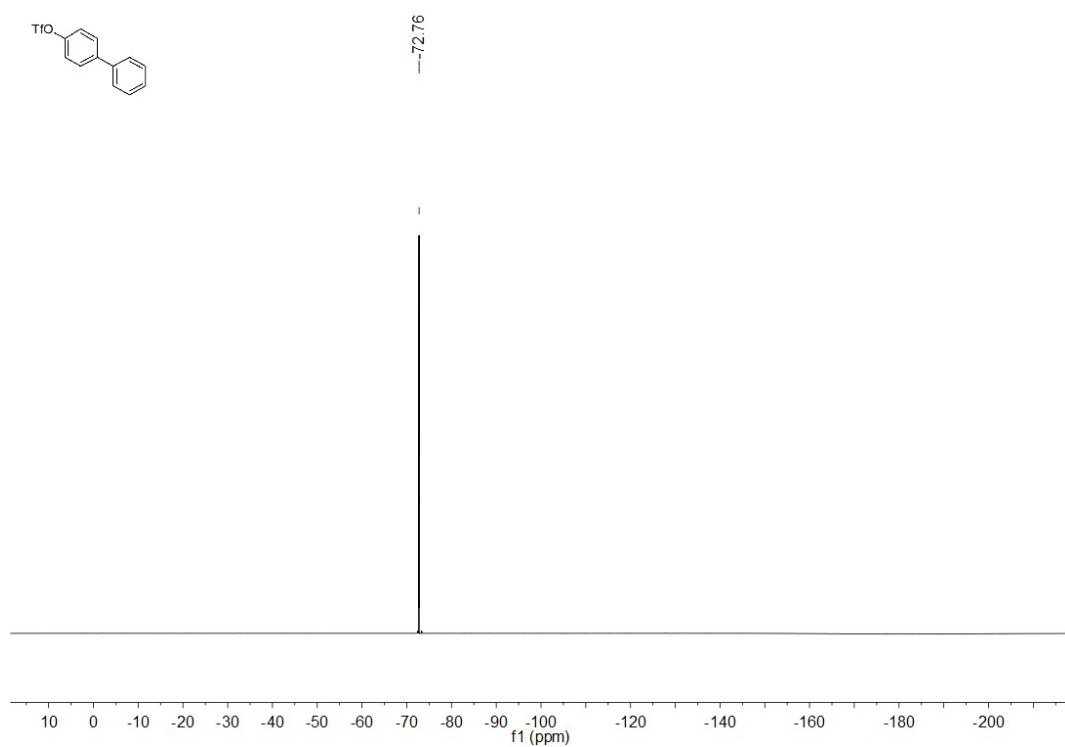

Figure S20. The NMR spectra of **3r**



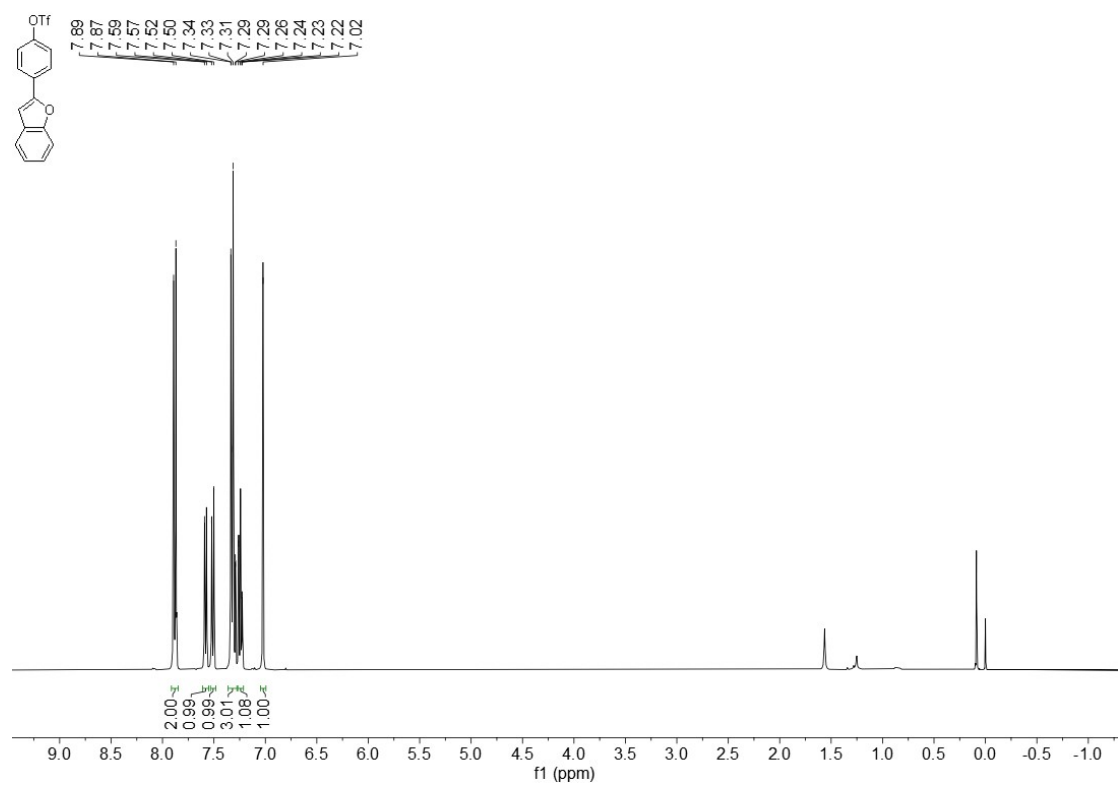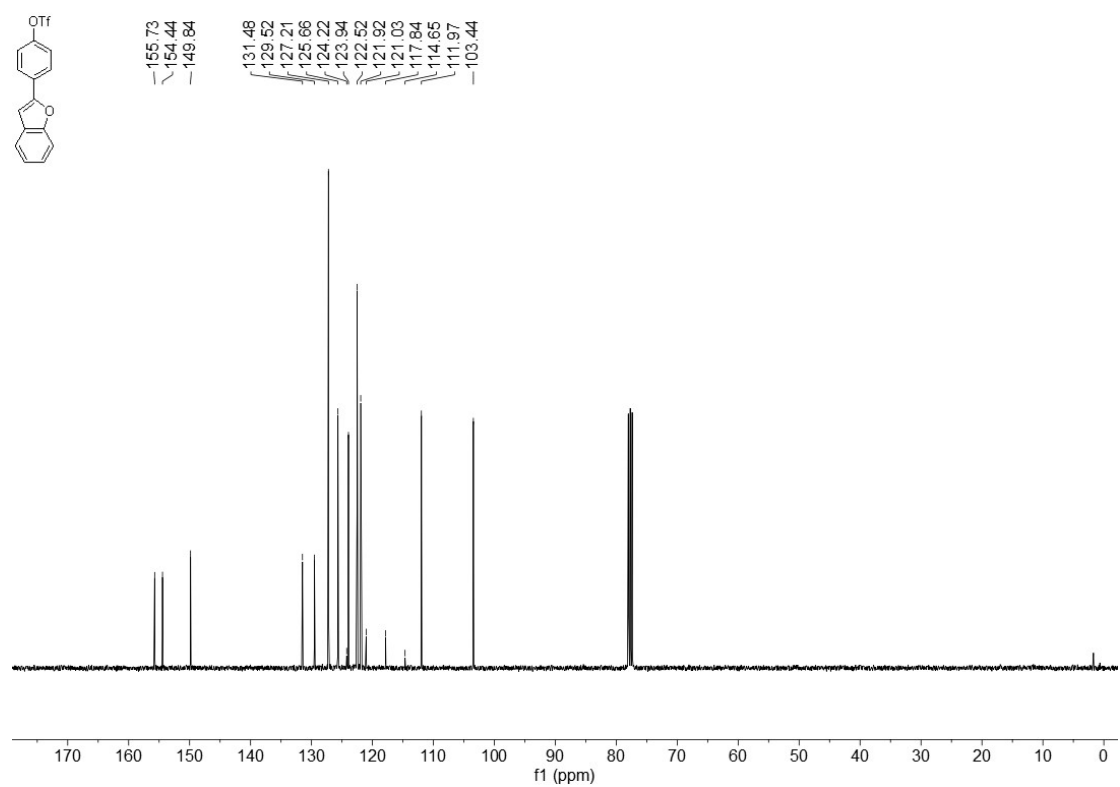



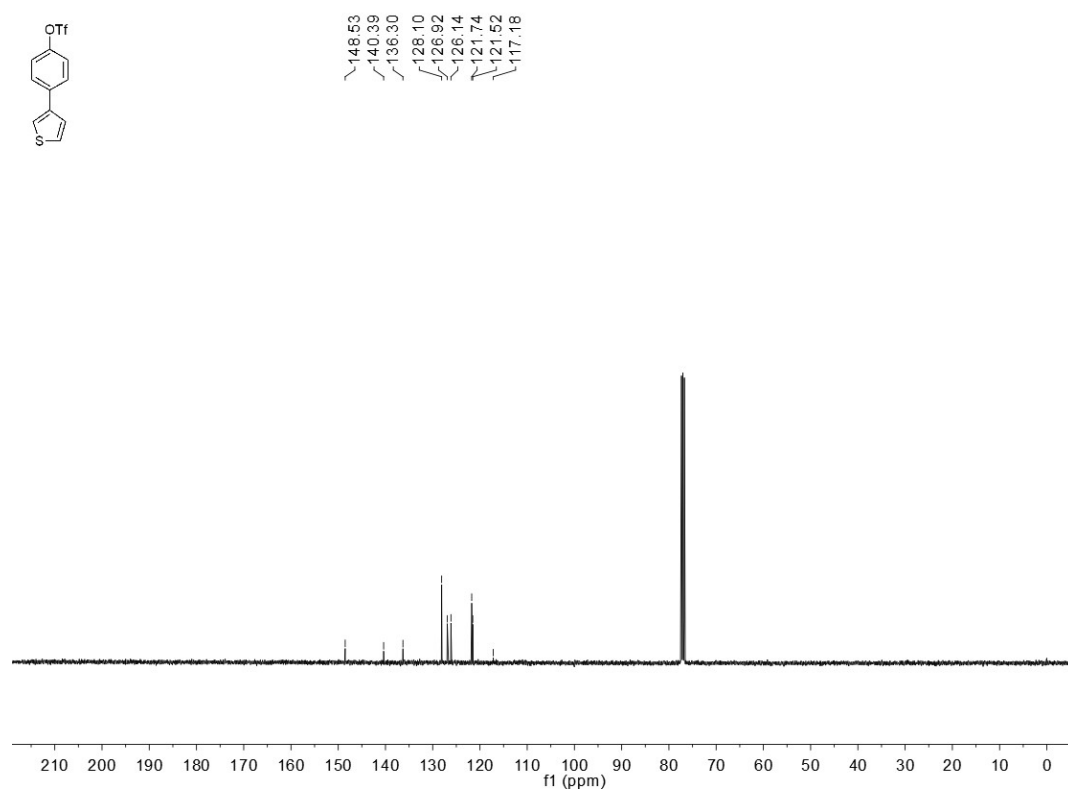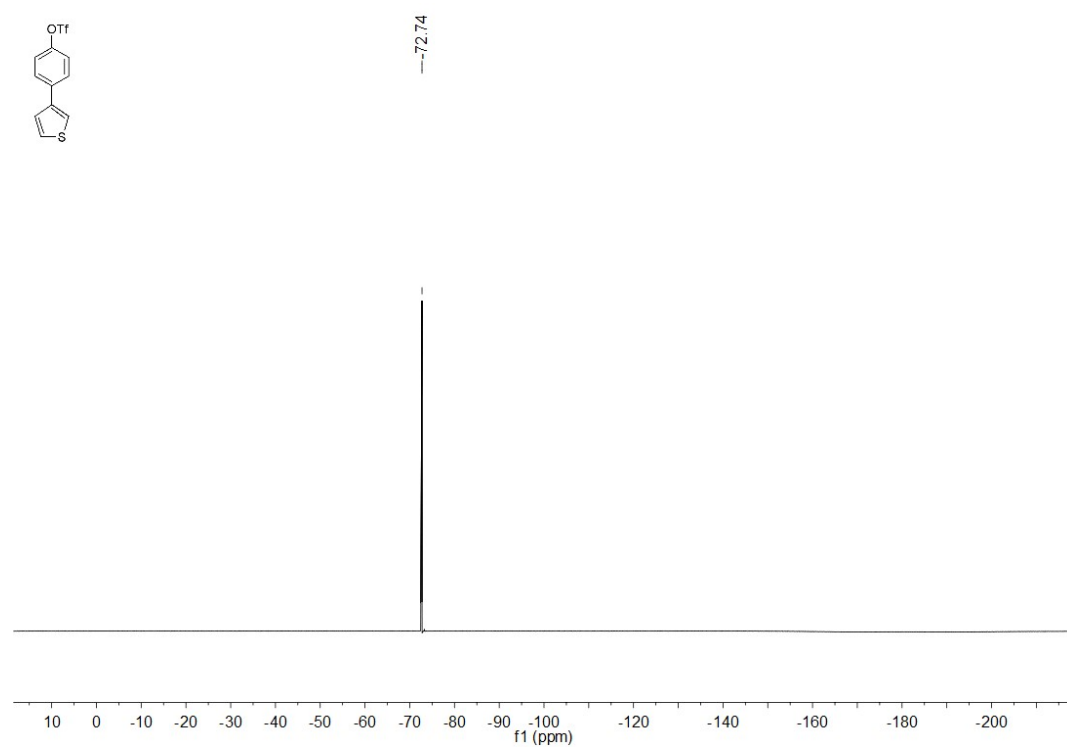

Figure S22. The NMR spectrums of **3t**

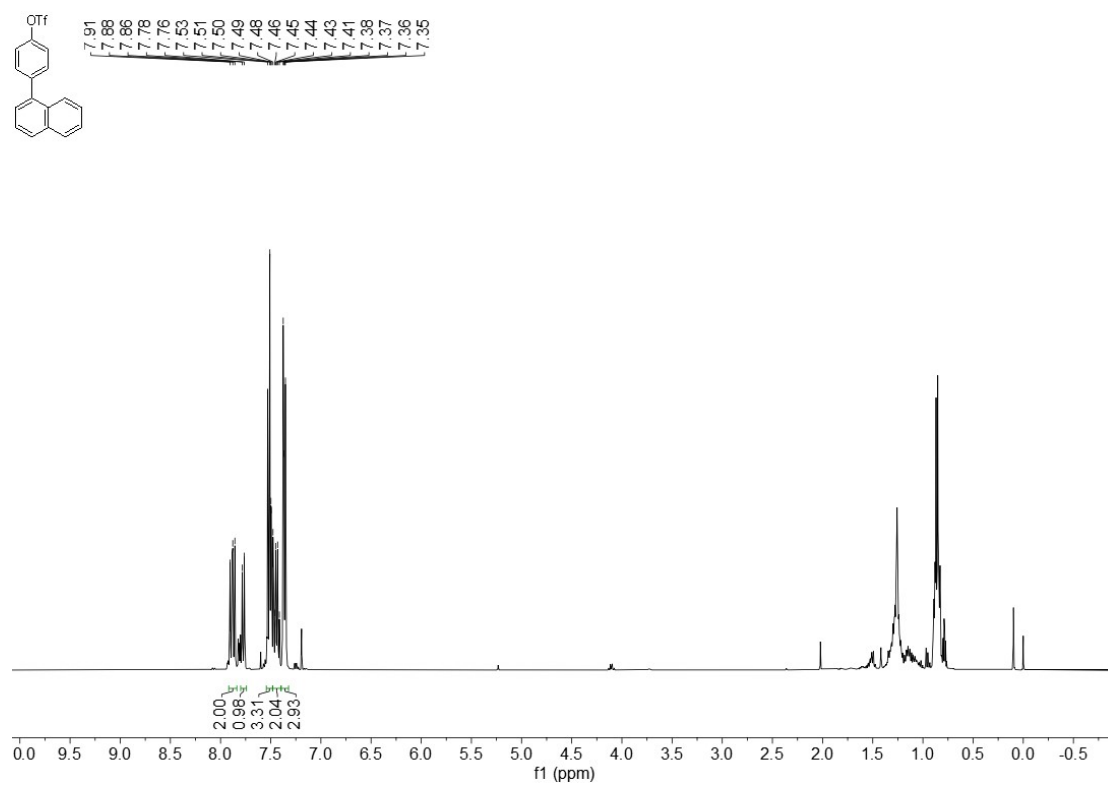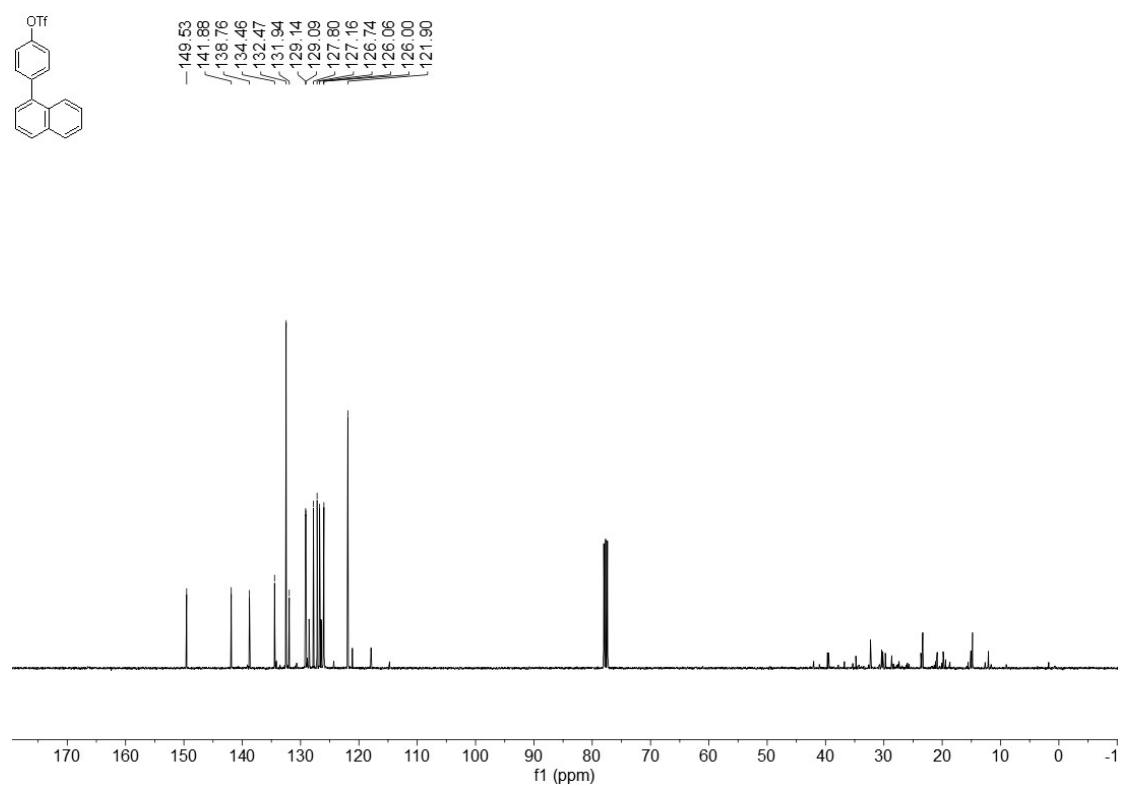

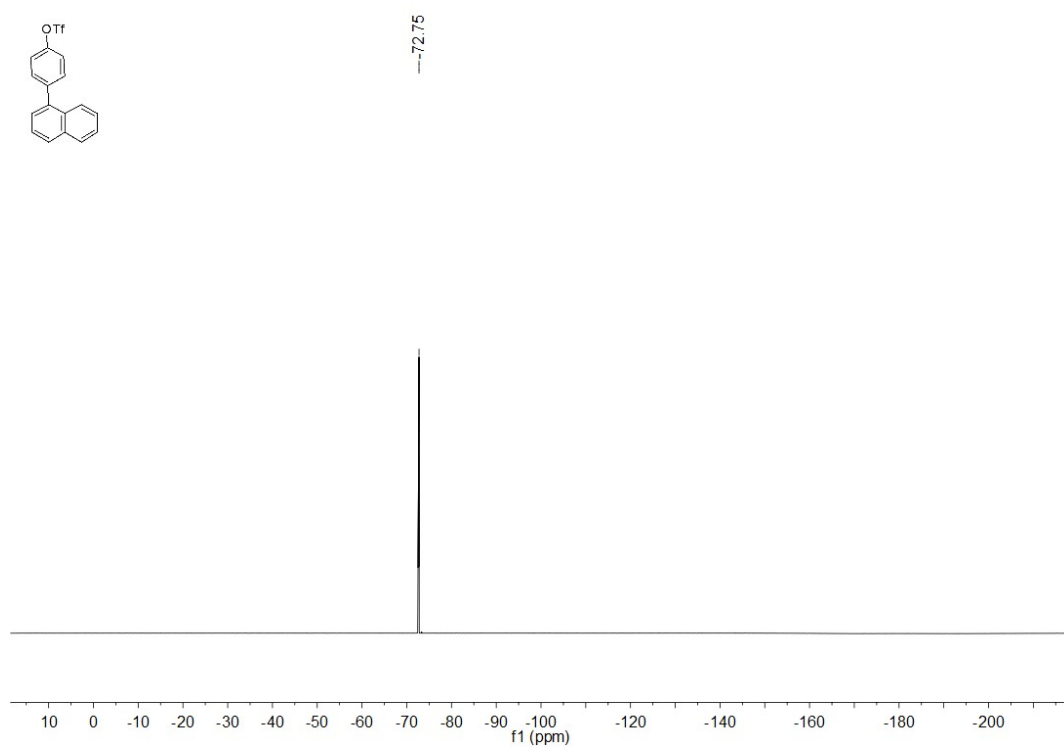

Figure S23. The NMR spectrums of **3u**

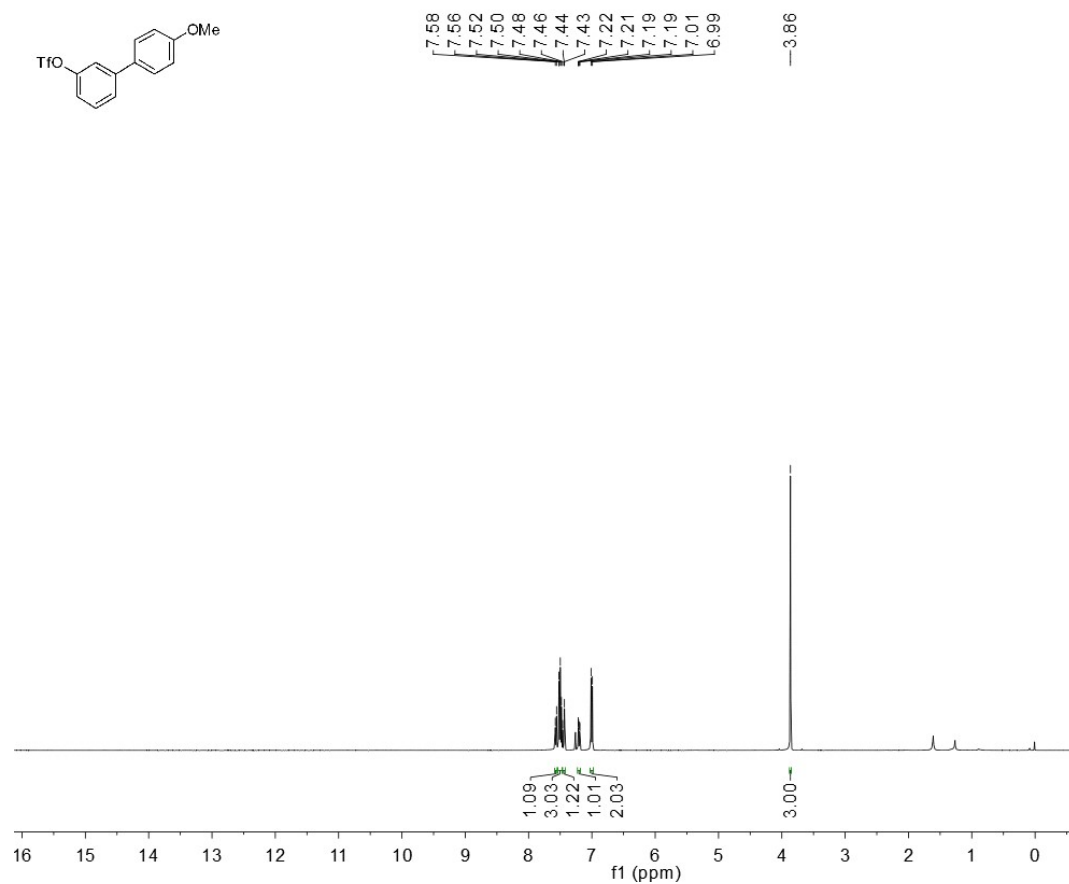

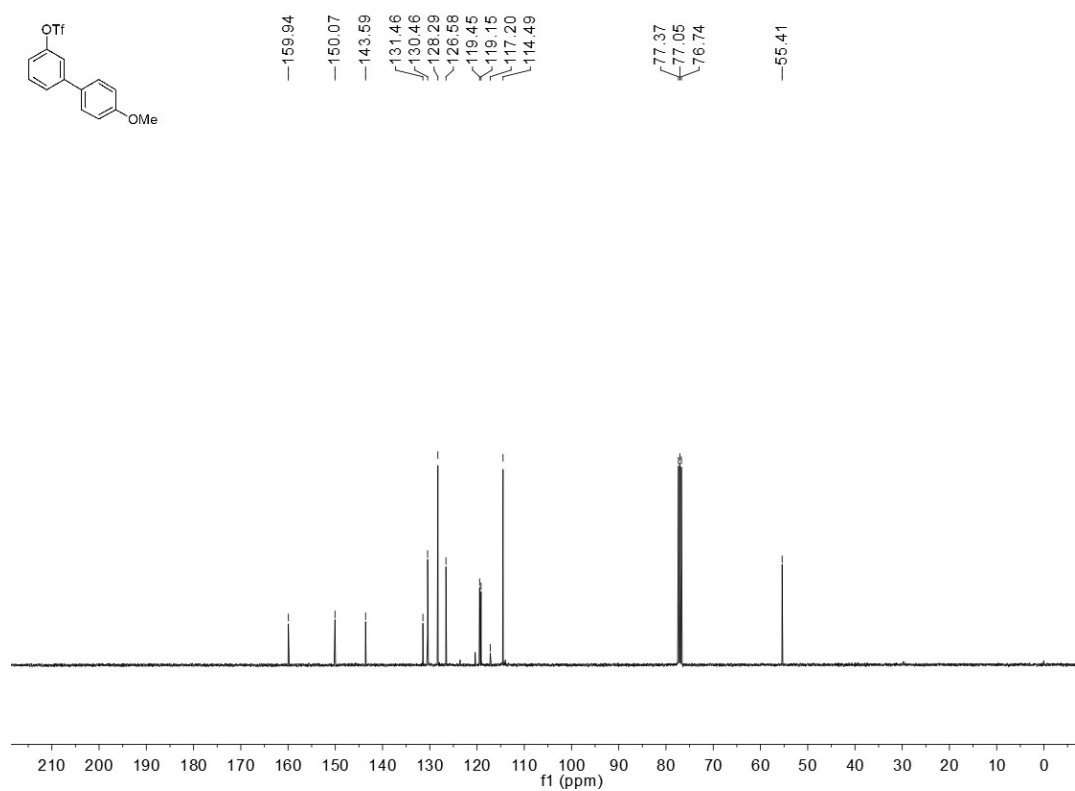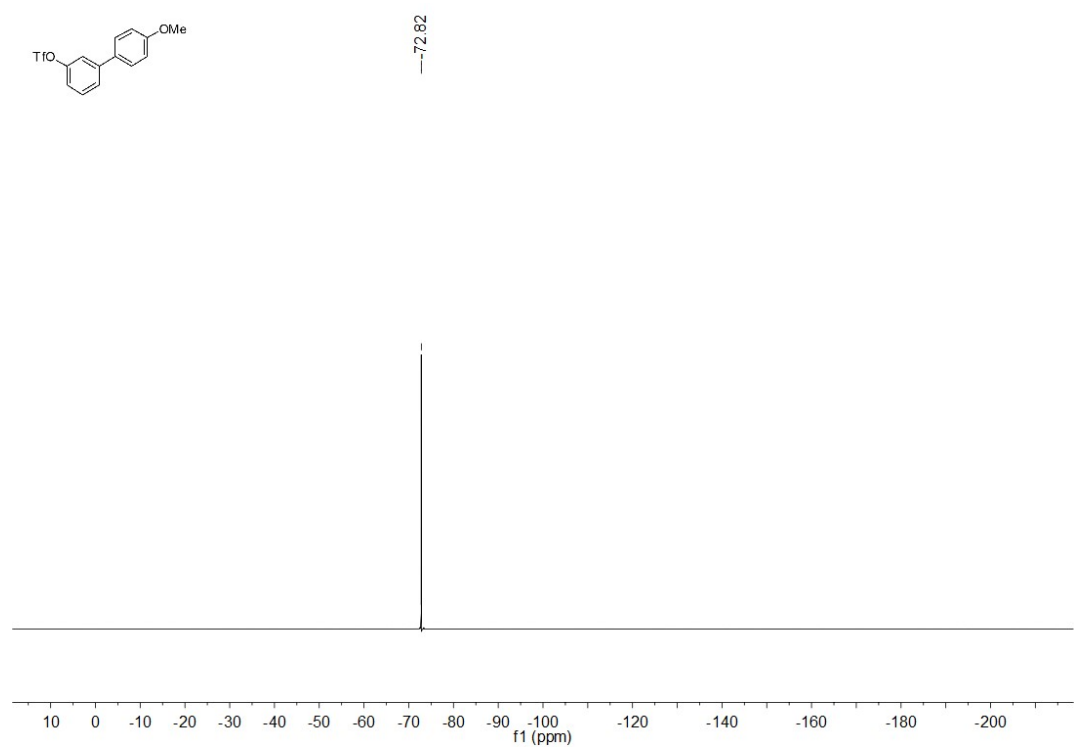

Figure S24. The NMR spectra of **3v**

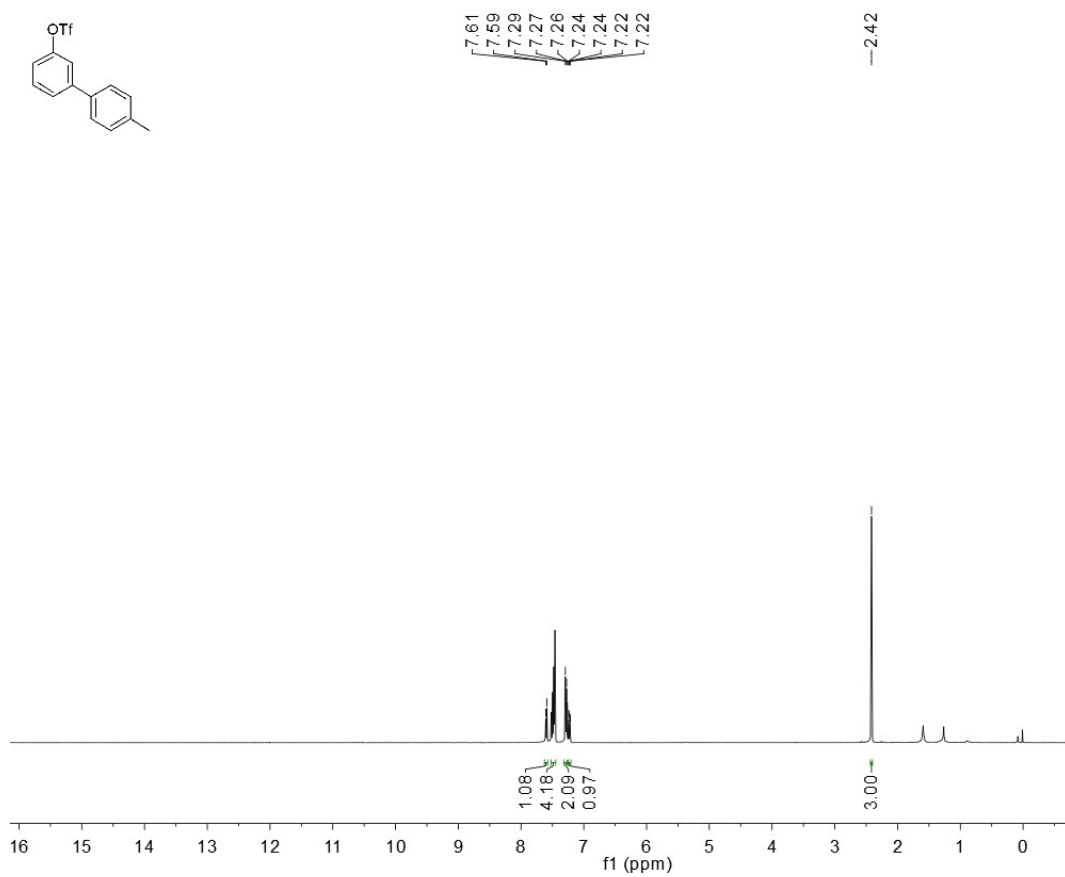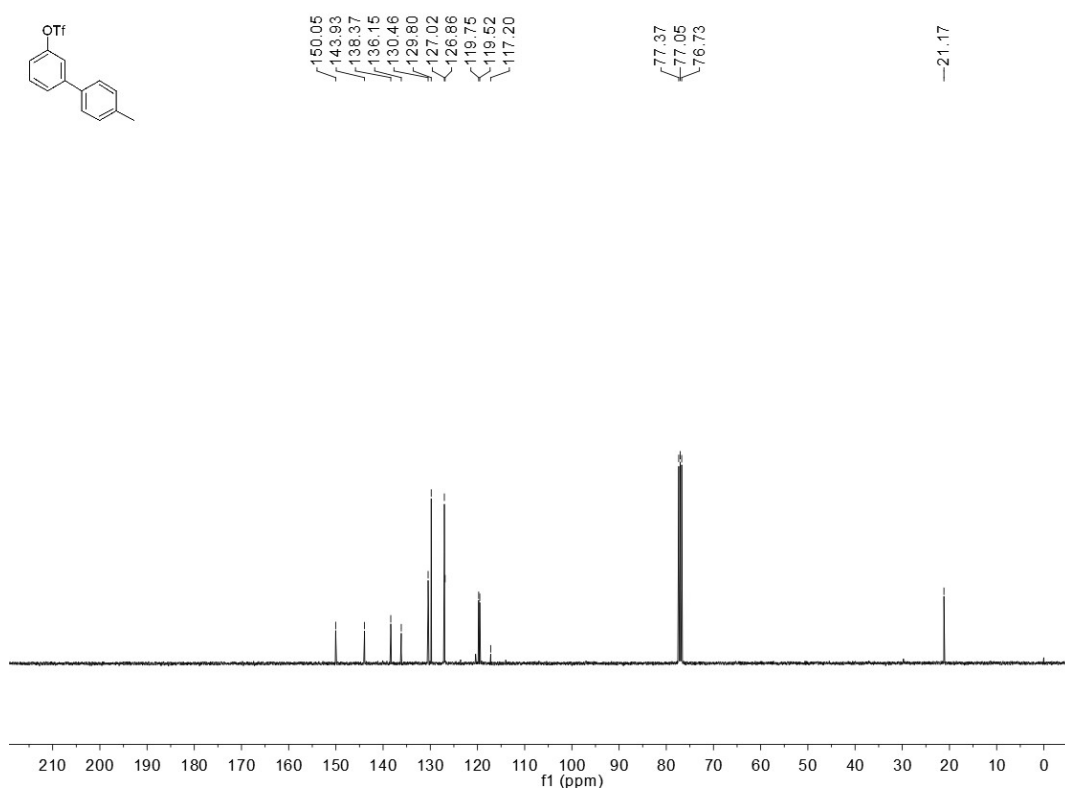

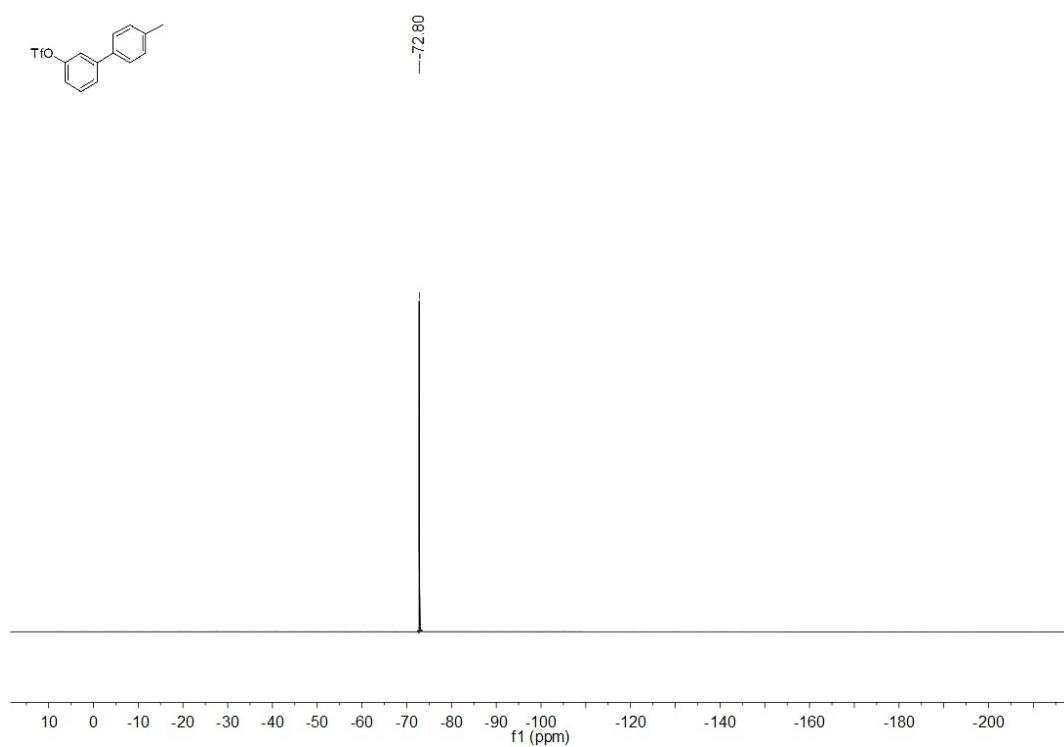

Figure S25. The NMR spectra of **3w**

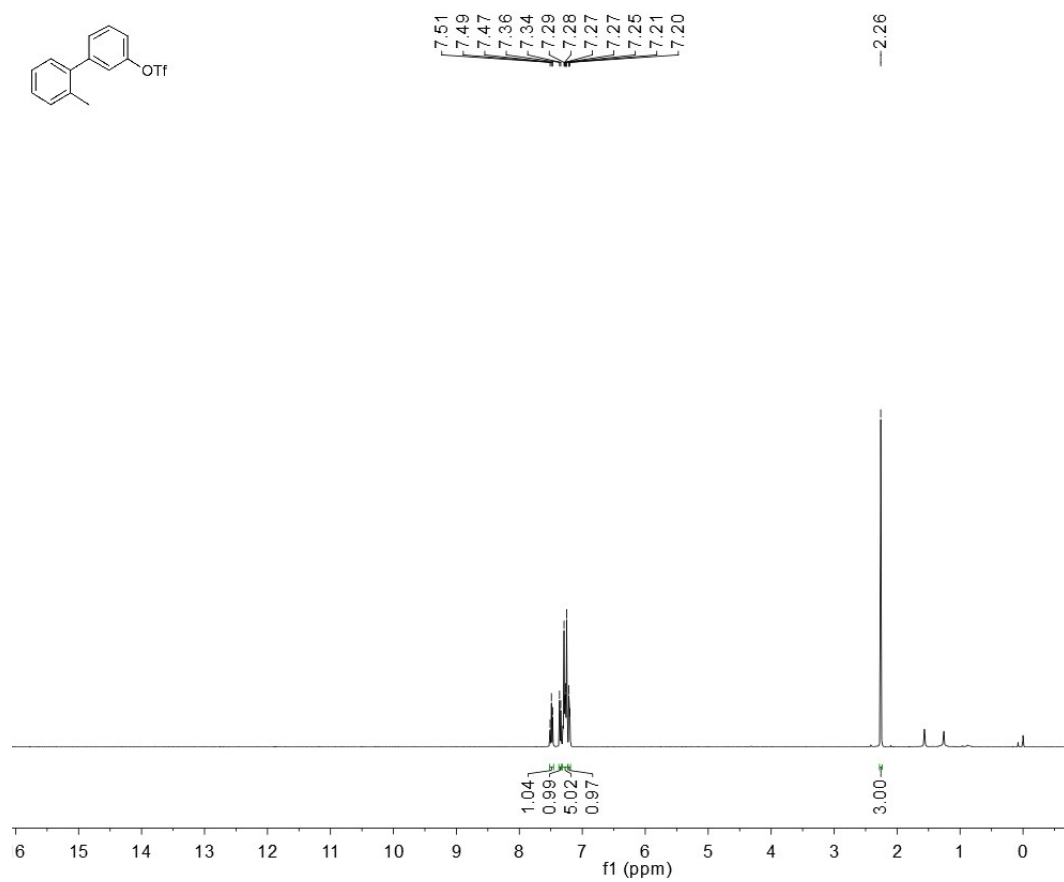



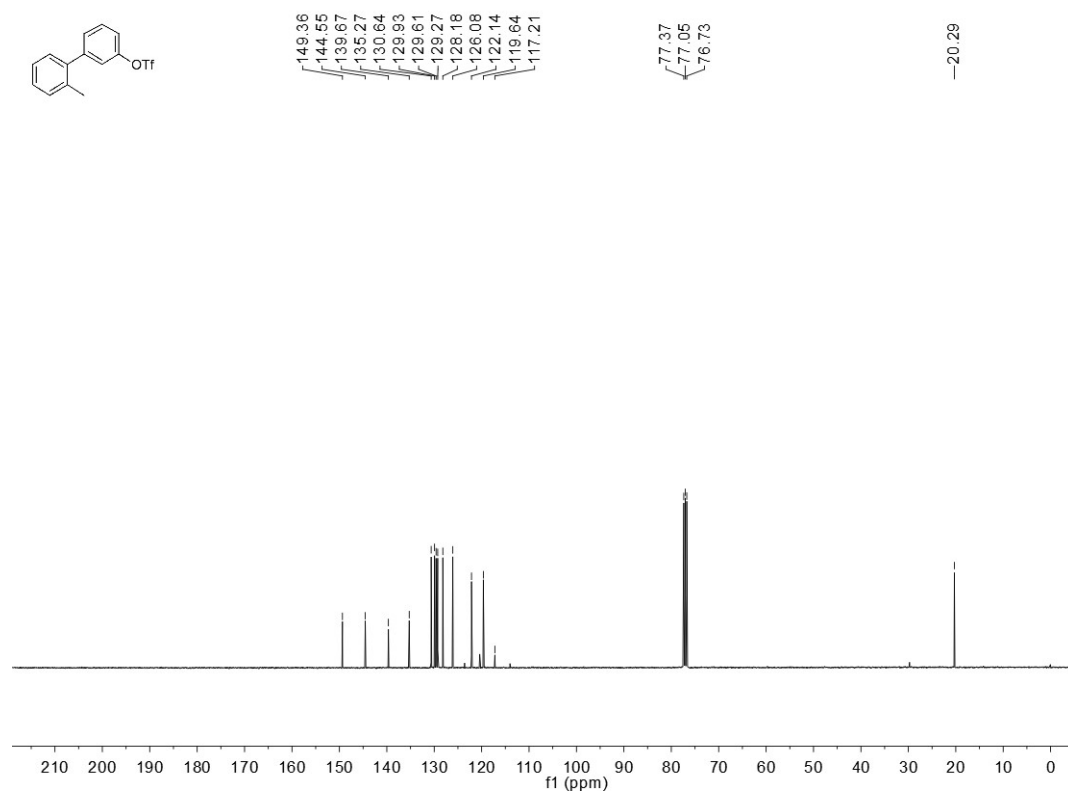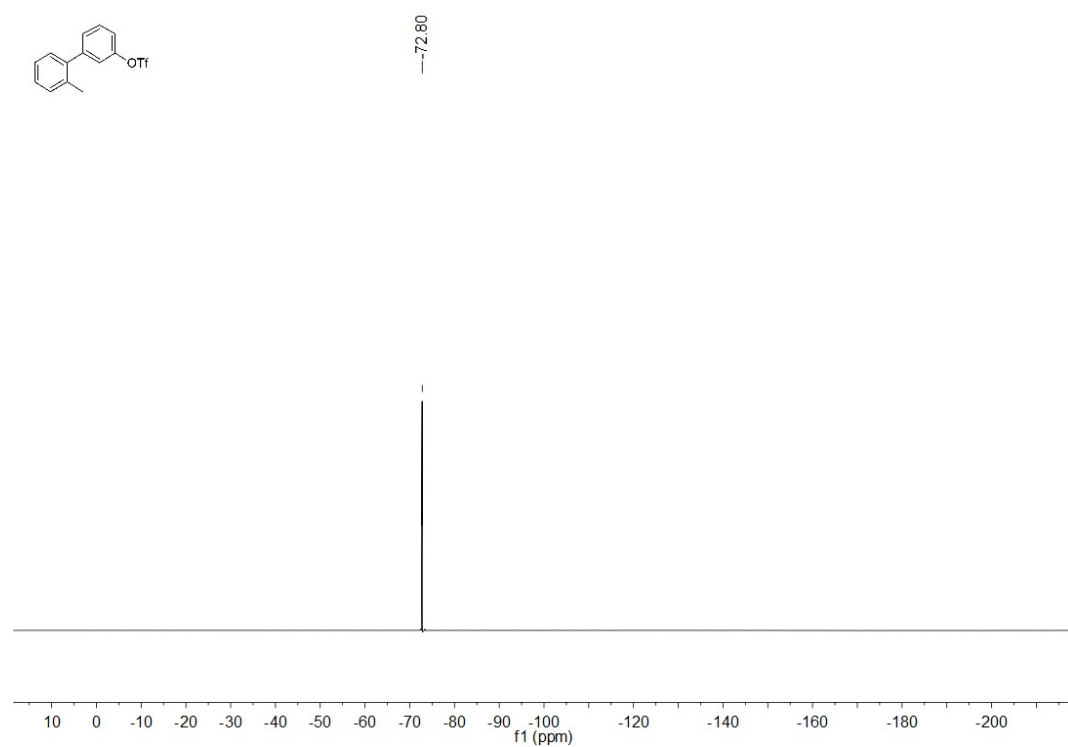

Figure S26. The NMR spectra of **3x**

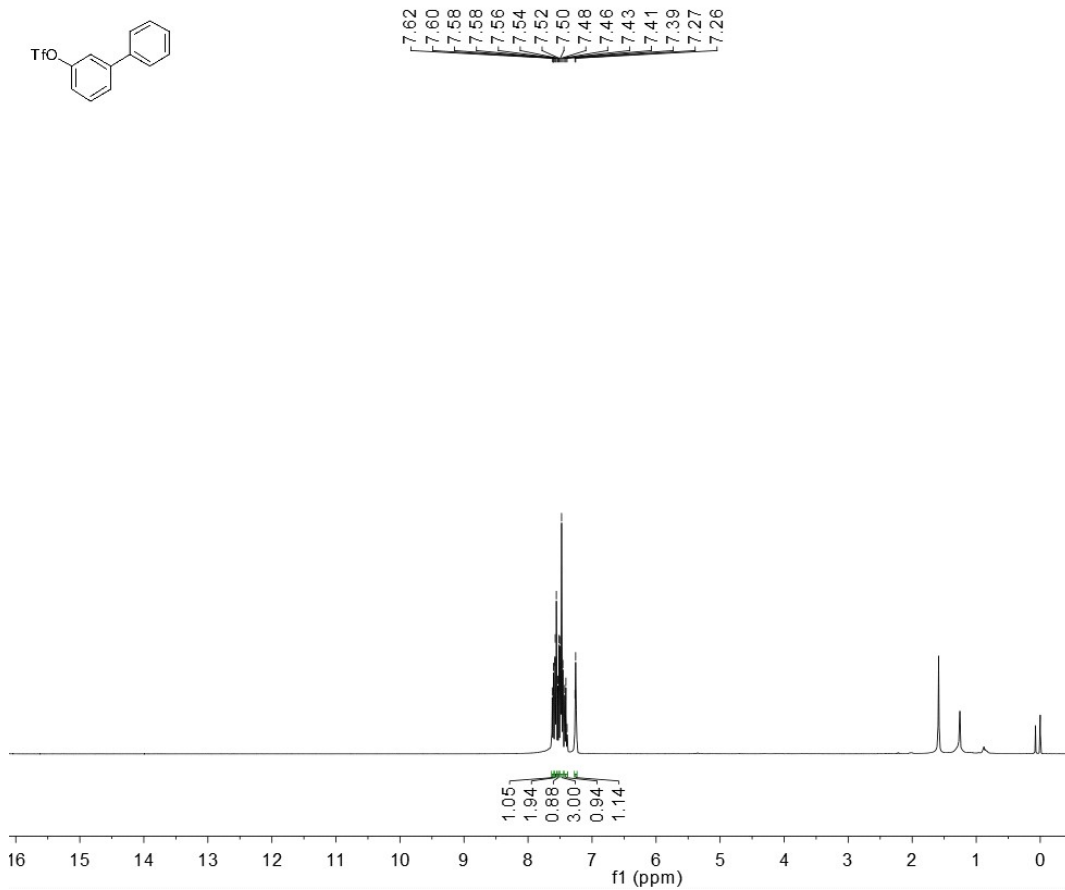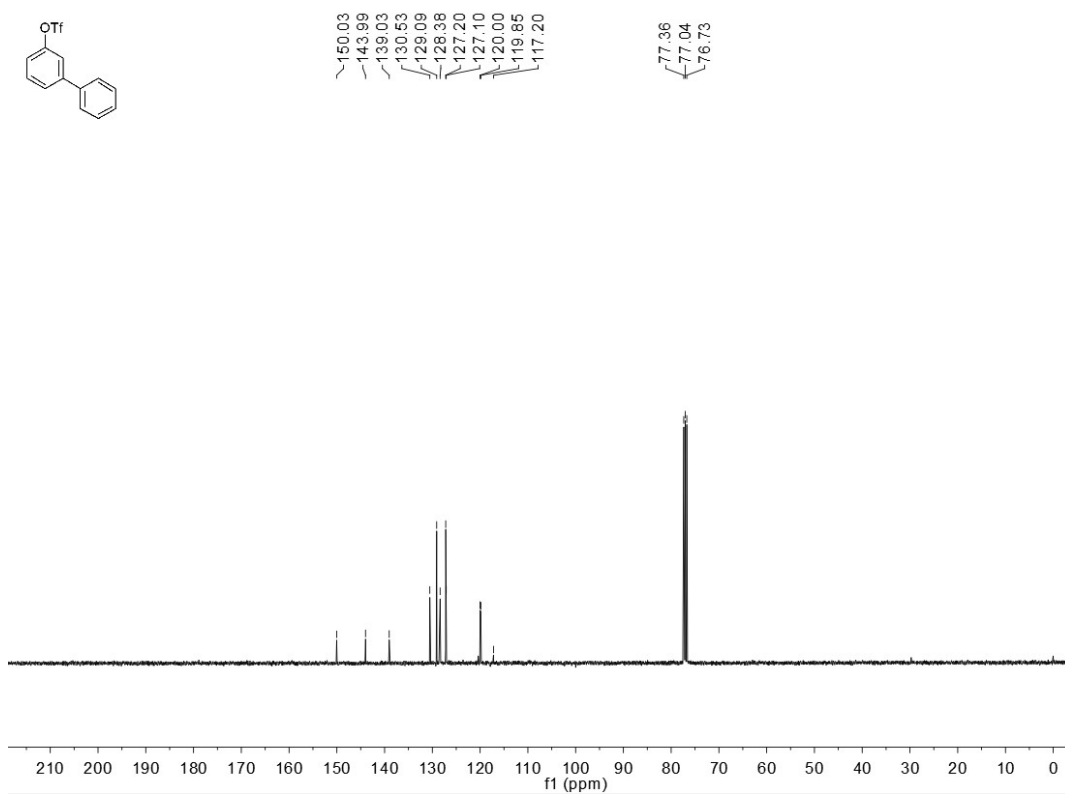

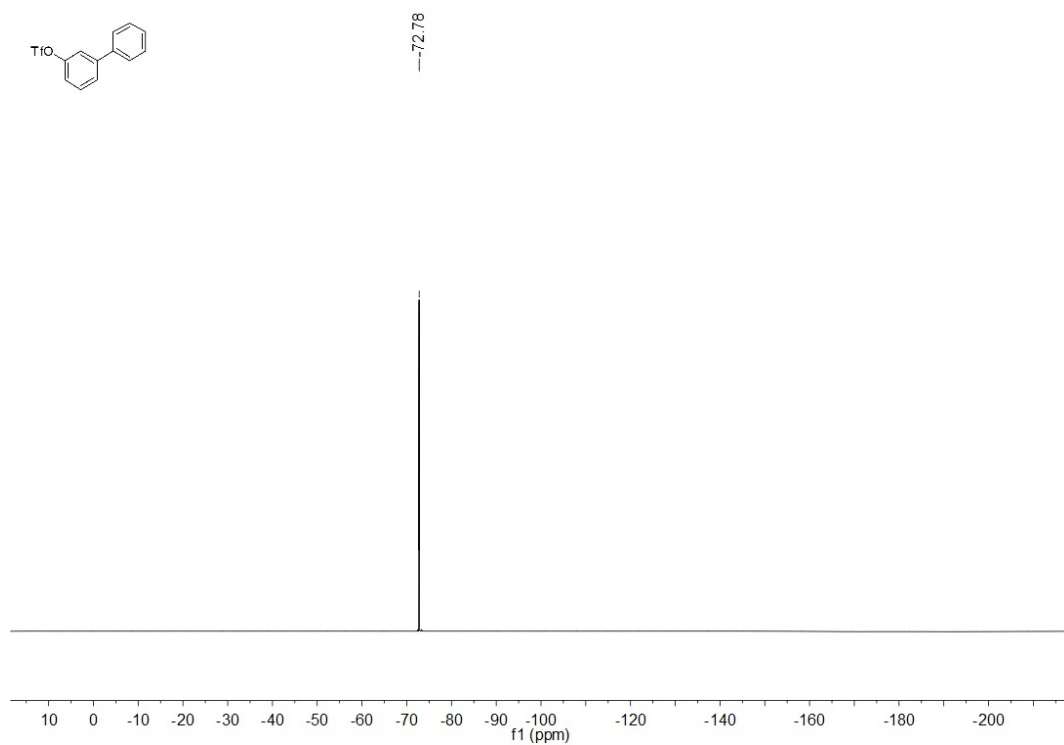

Figure S27. The NMR spectra of **3y**

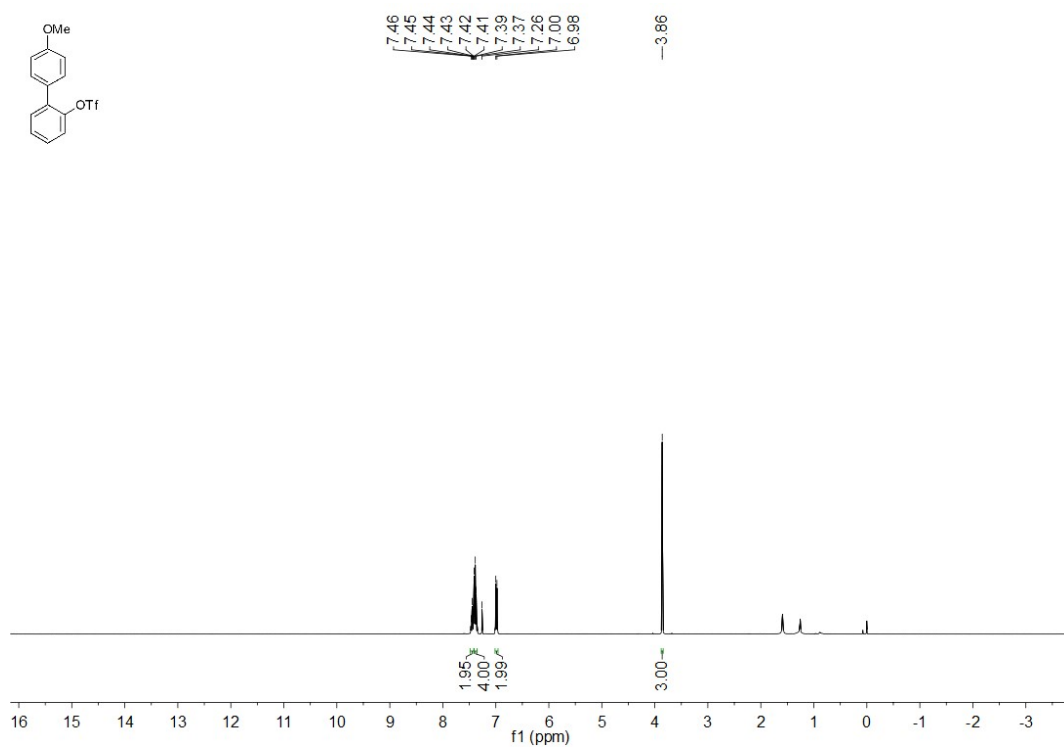

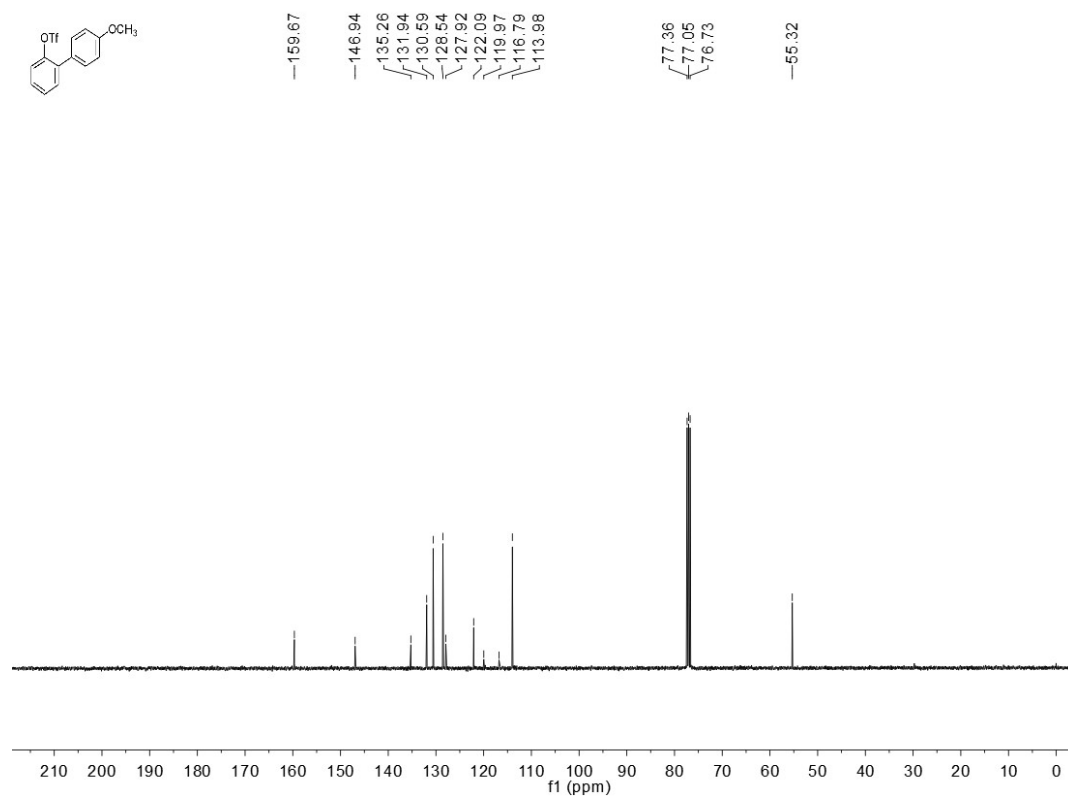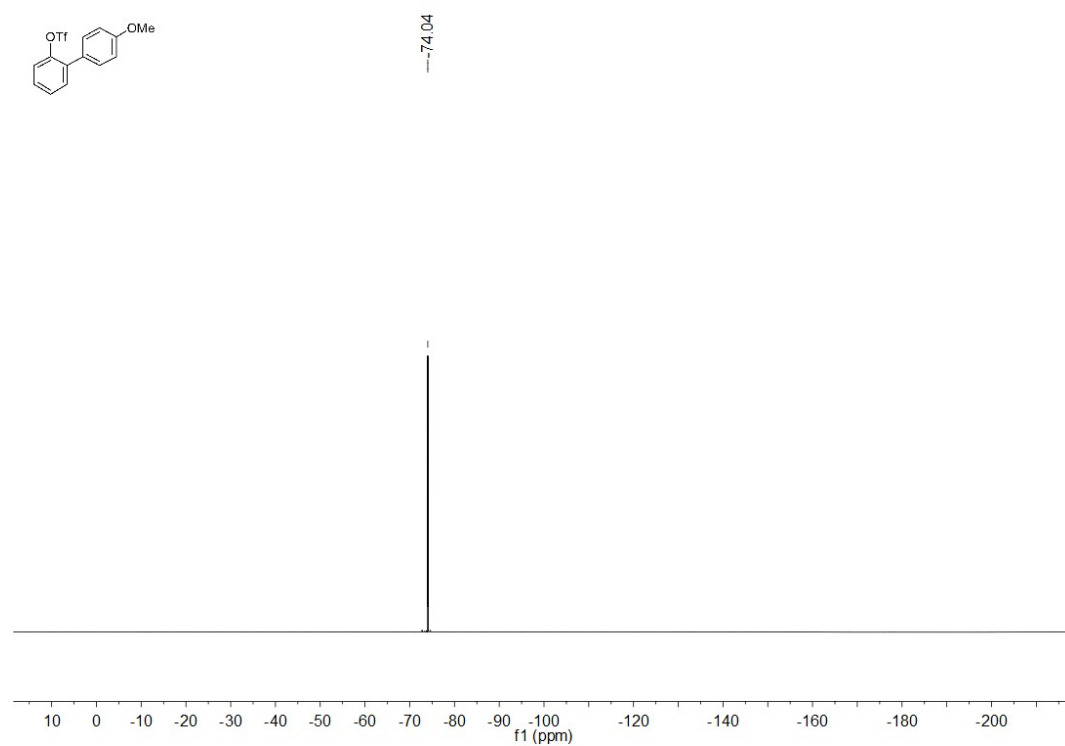

Figure S28. The NMR spectrums of **3z**

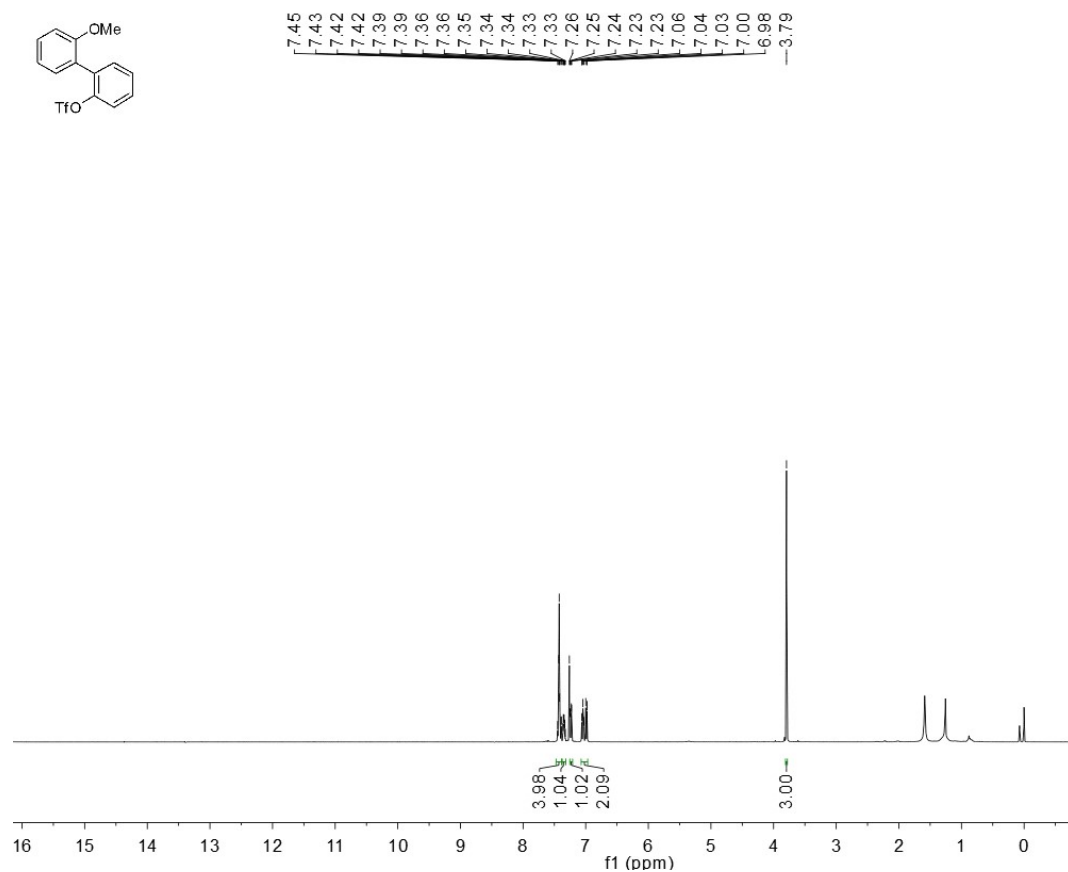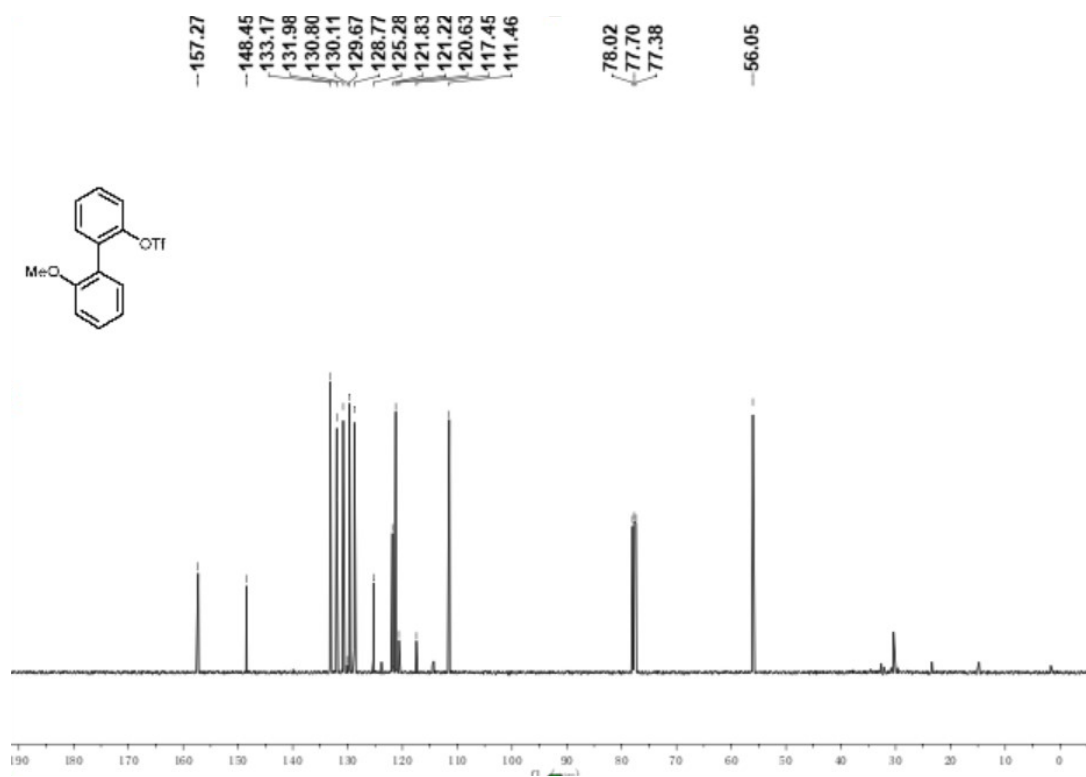

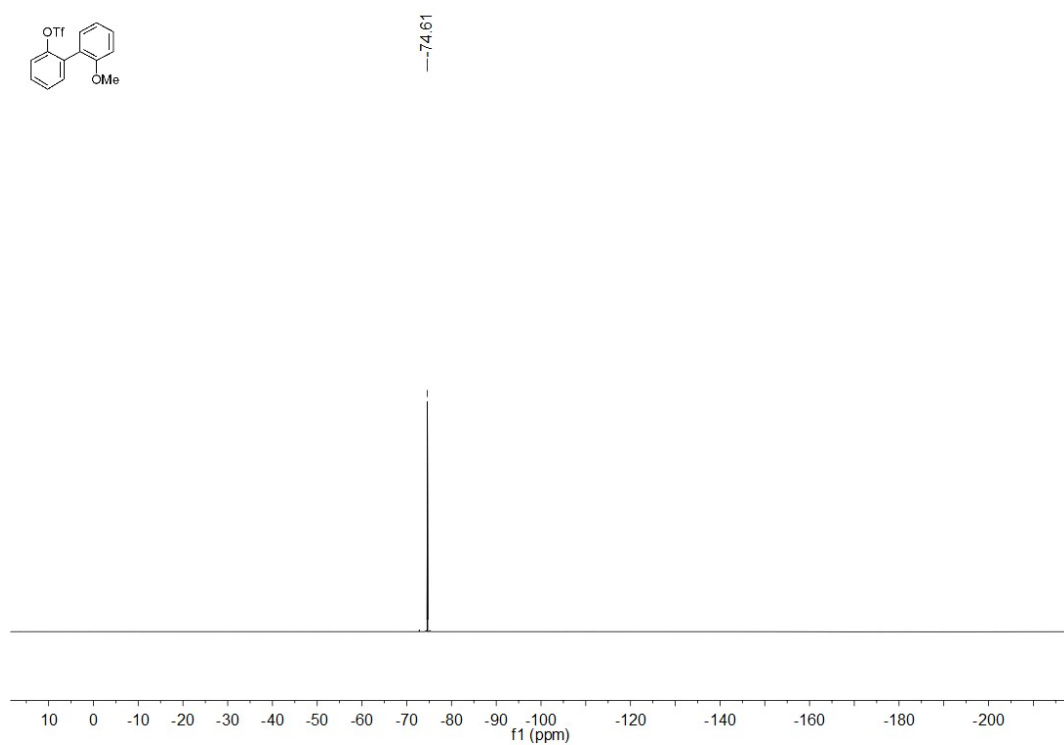

Figure S29. The NMR spectra of **4a**

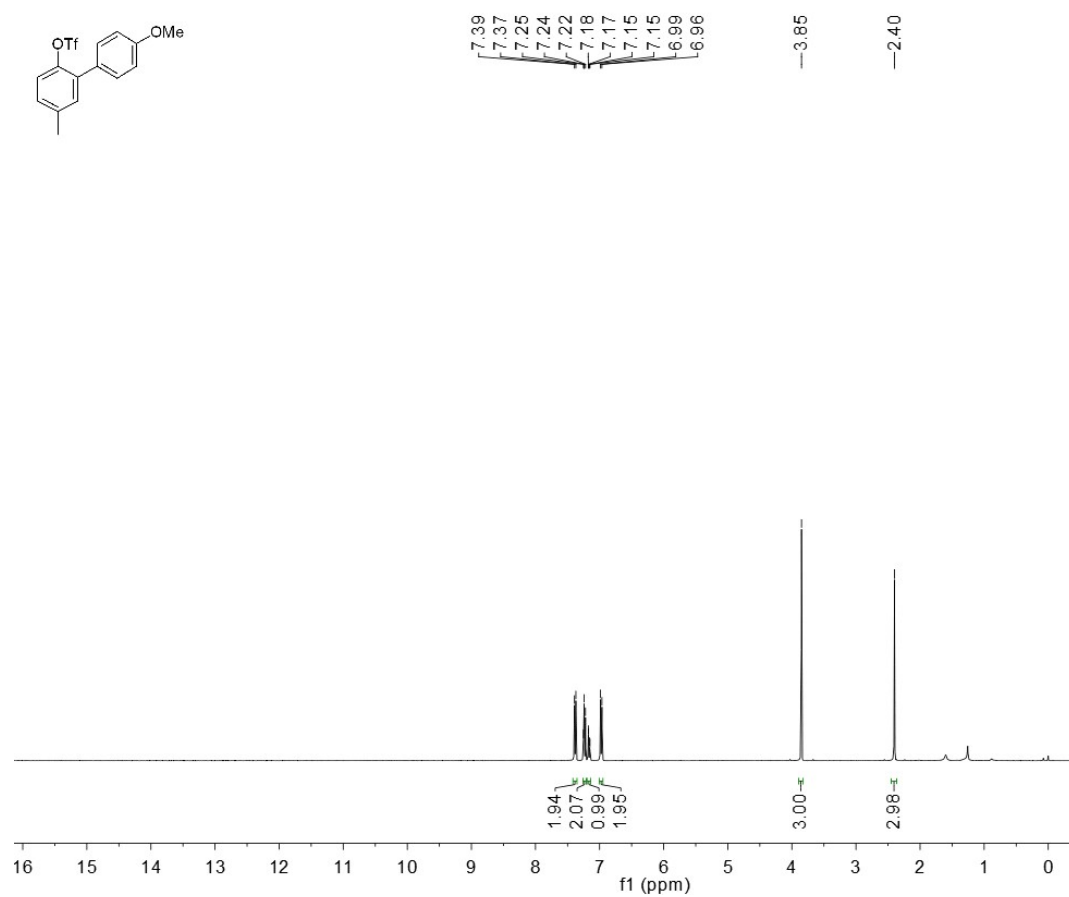

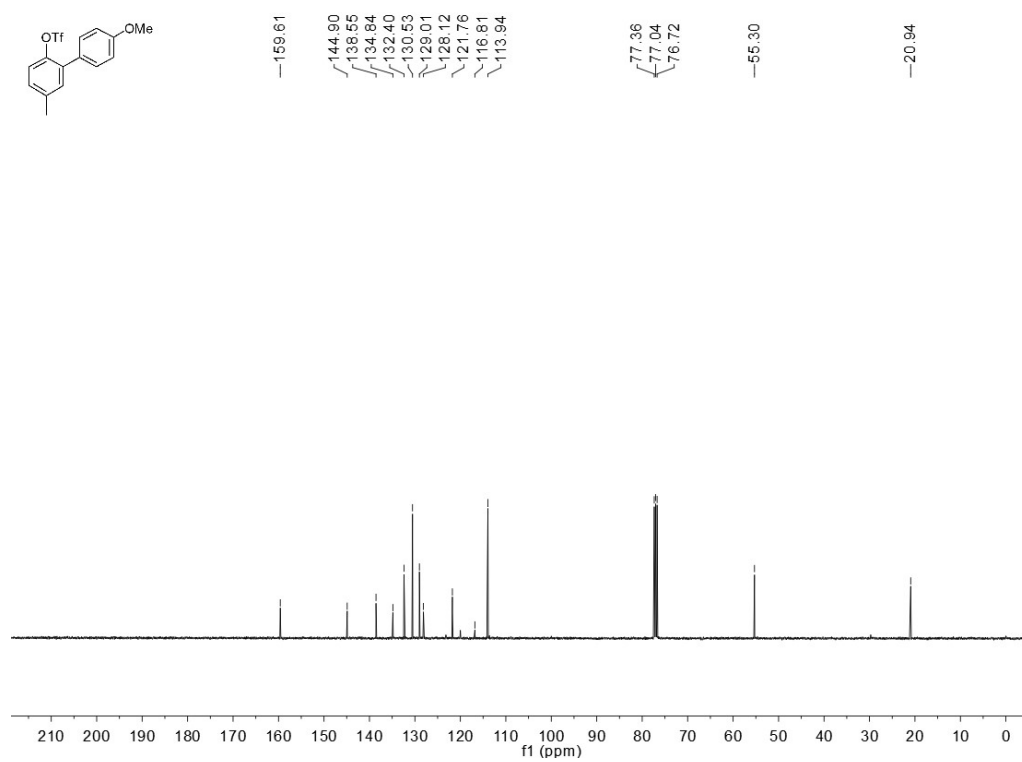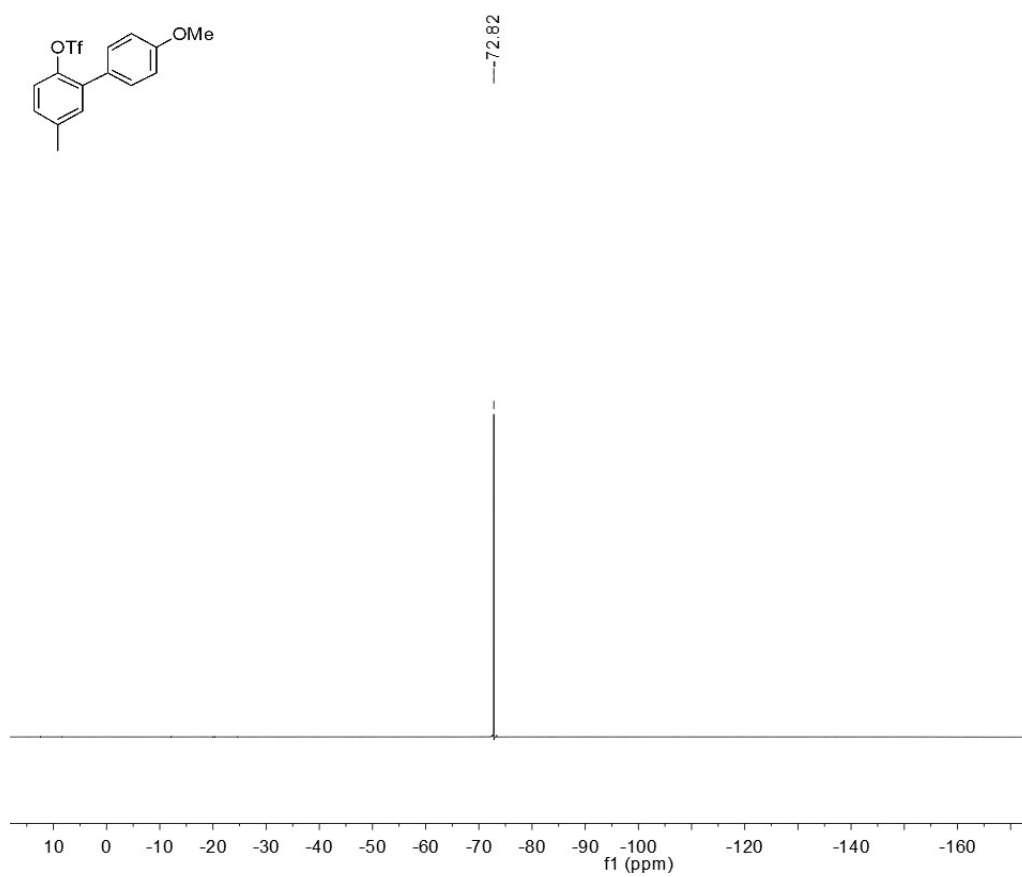

Figure S30. The NMR spectra of **4b**

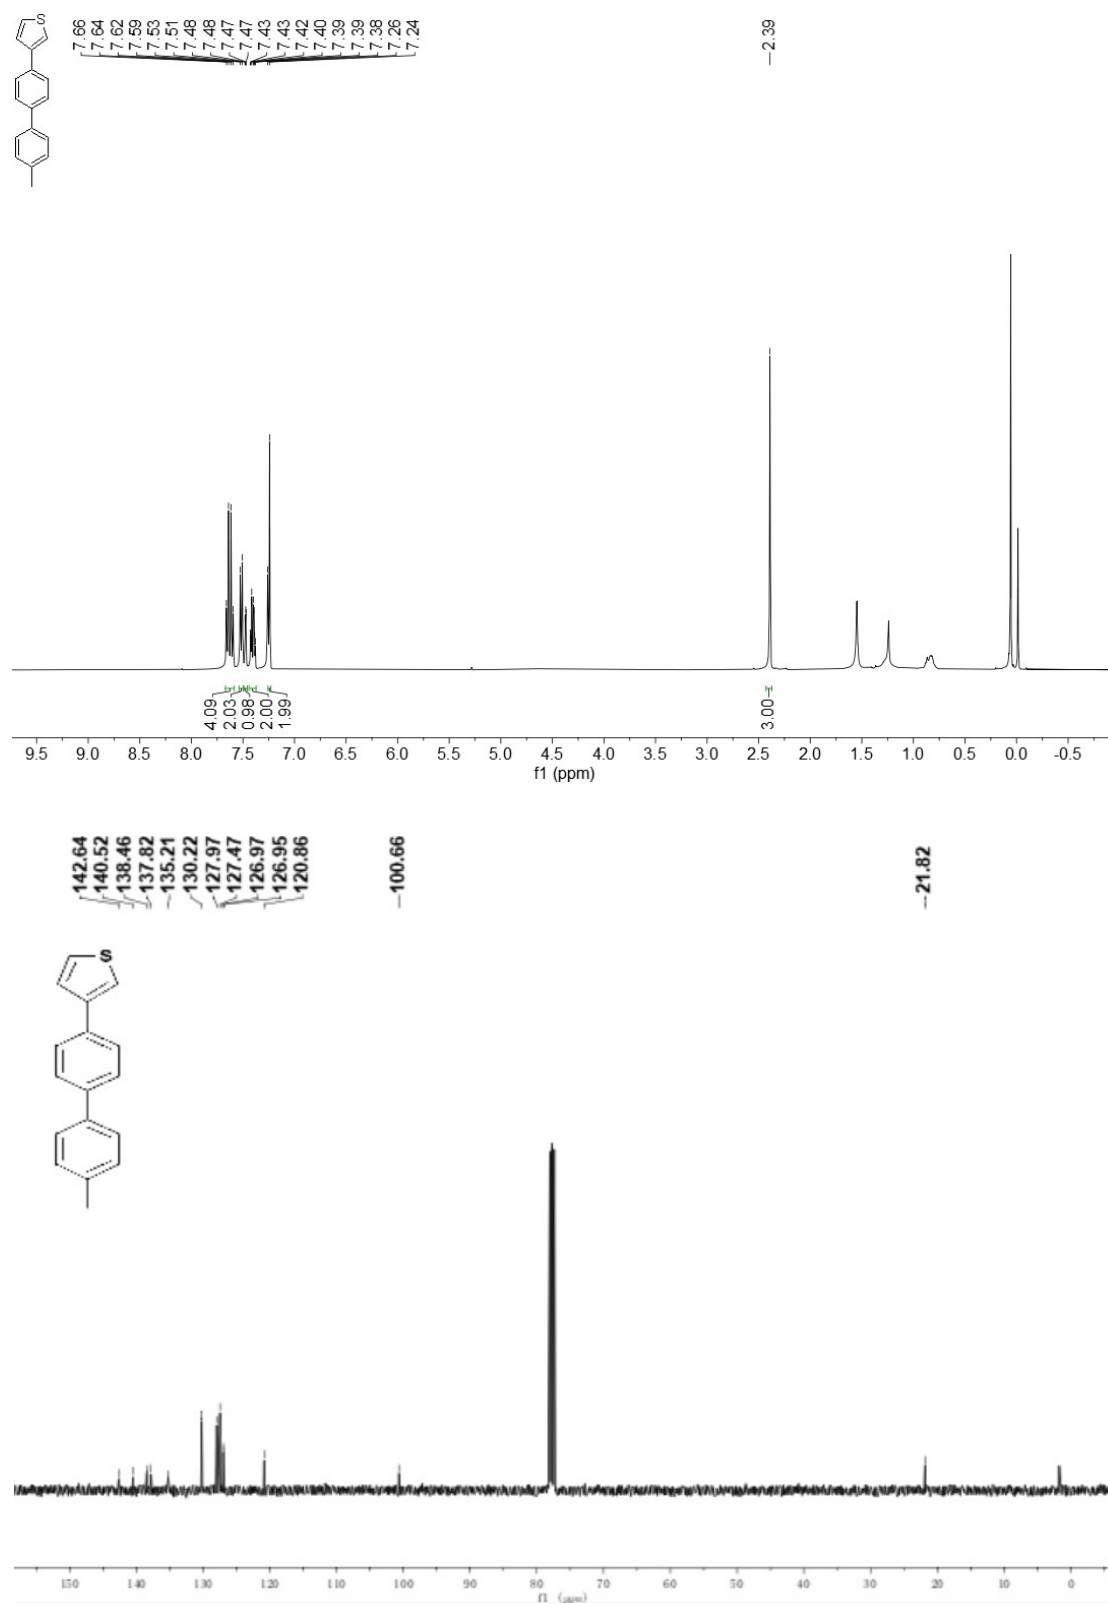

Figure S31. The NMR spectra of **5a**



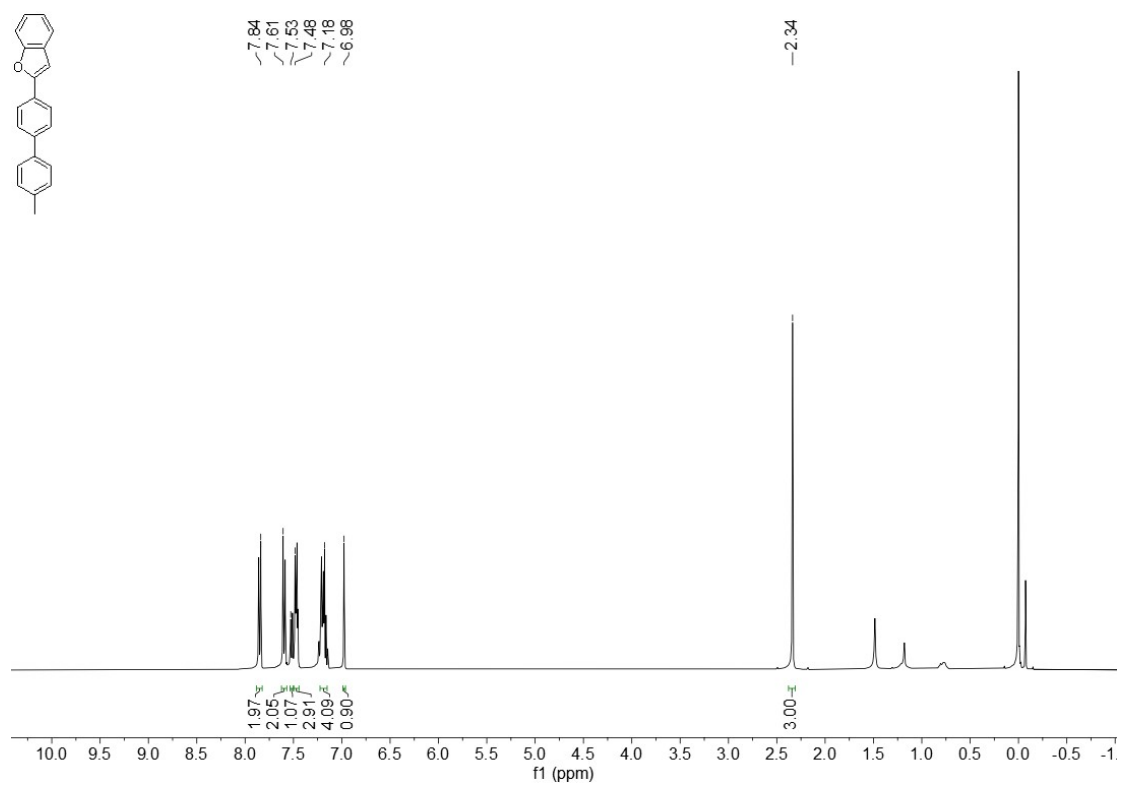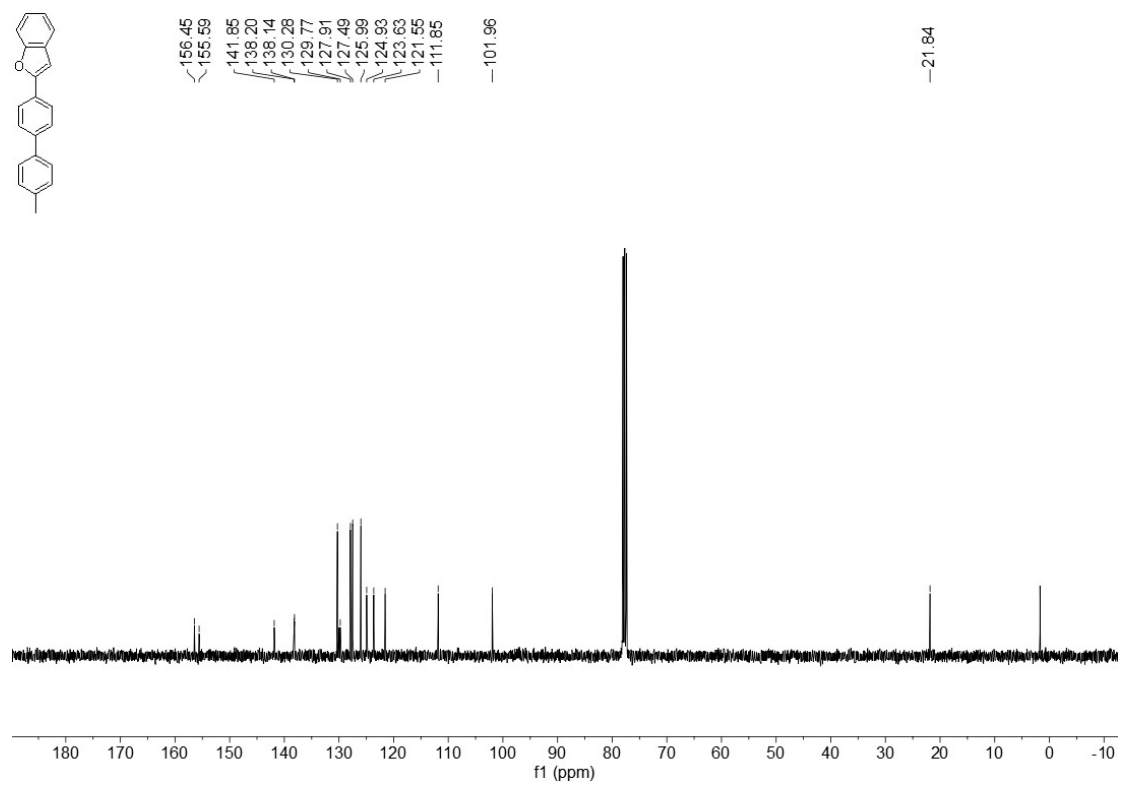

Figure S32. The NMR spectra of **5b**

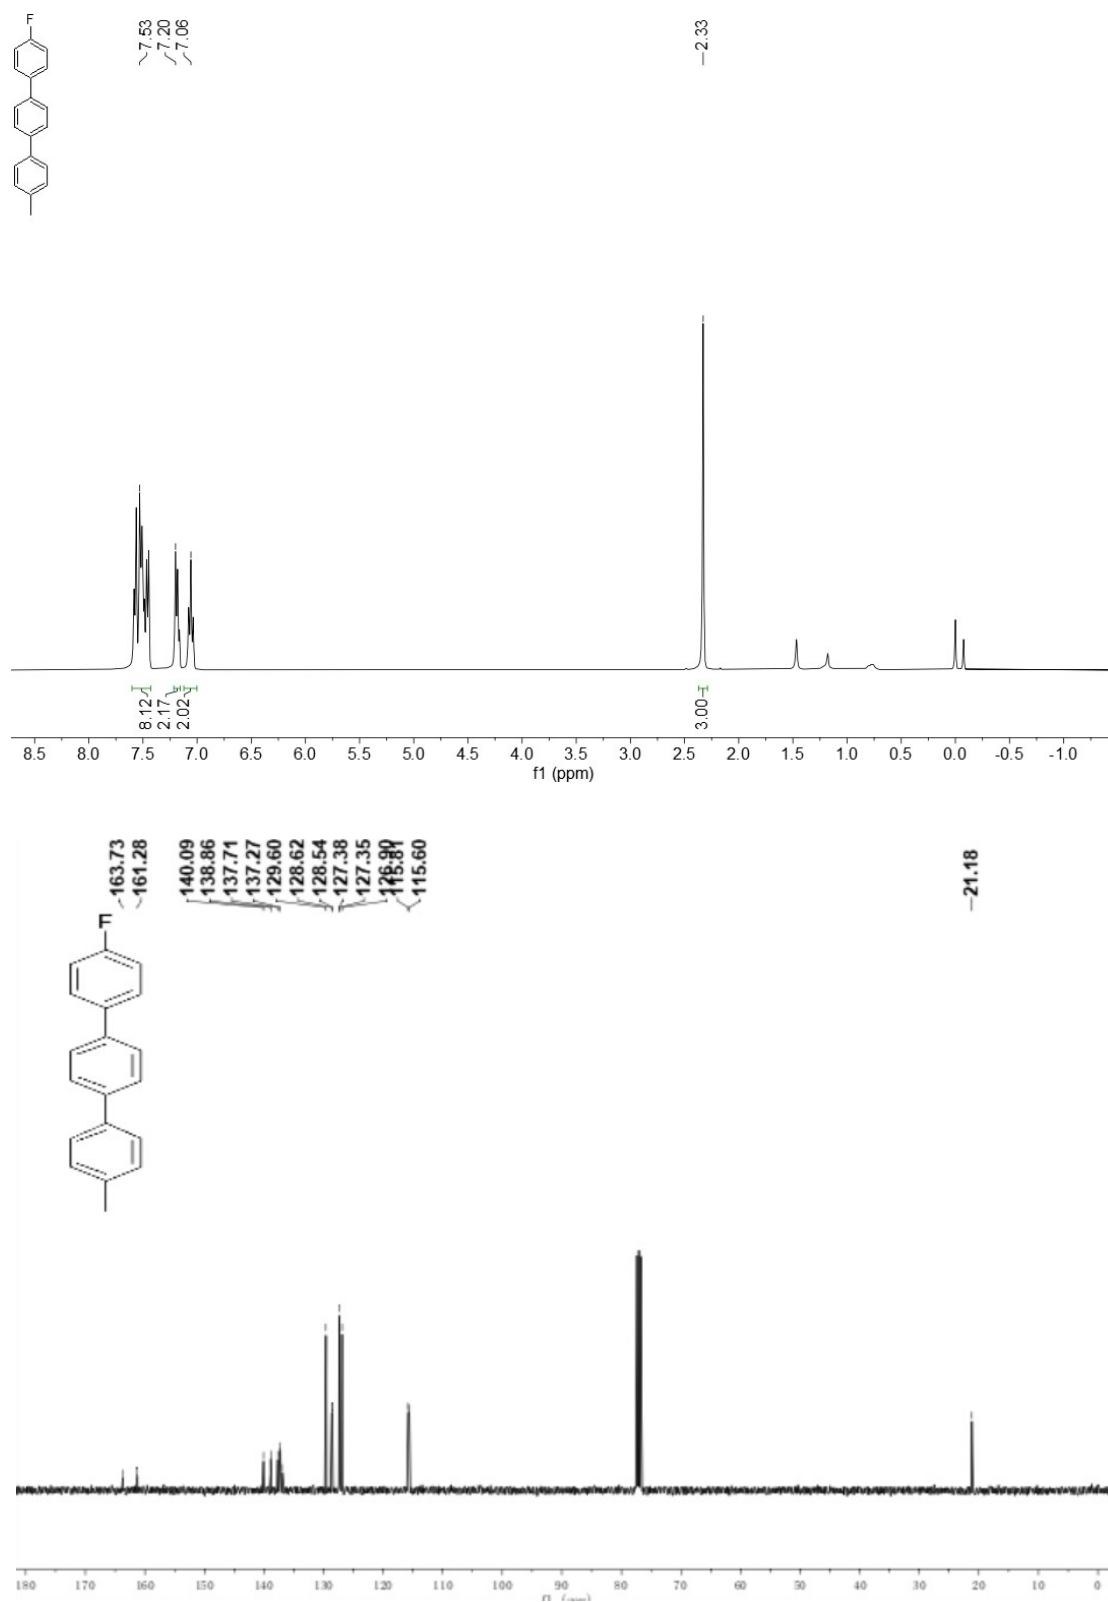

Figure S33. The NMR spectrums of 5c

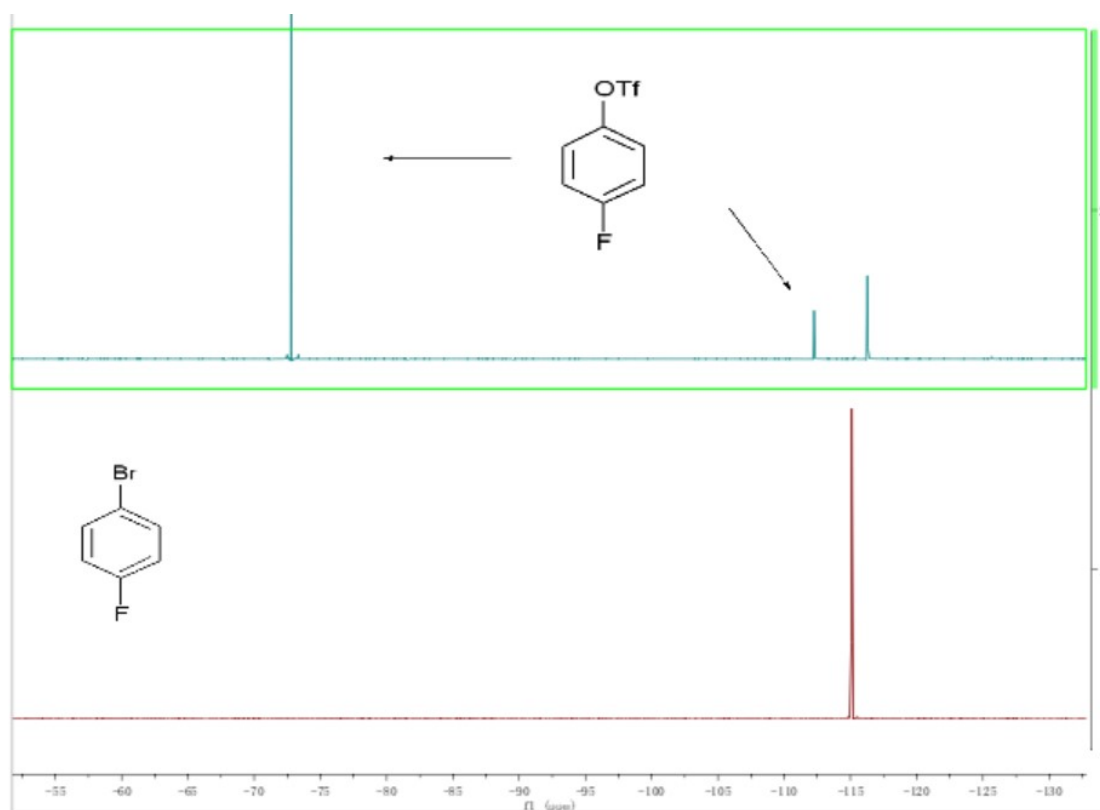

Figure S34. The  $^{19}\text{F}$  NMR spectra of 1-bromo-4-fluorobenzene (lower) and the crude product of competitive Suzuki reaction (upper)

## 6. References

1. J.-S. Ouyang, Y.-F. Li, D.-S. Shen, Z. Ke and F.-S. Liu, *Dalton Trans.*, 2016, **45**, 14919-14927
2. F.-M. Chen, D.-D. Lu, L.-Q. Hu, J. Huang and F.-S. Liu, *Org. Biomol. Chem.*, 2017, **15**, 5731-5736.
3. L.-Q. Hu, R.-L. Deng, Y.-F. Li, C.-J. Zeng, D.-S. Shen and F.-S. Liu, *Organometallics*, 2018, **37**, 214-226.
